# Supplementary material
Source: PubMed Central journal article supplement (PMC4727754)
Supplement: NIHMS752154-supplement-SI.pdf [file NIHMS752154-supplement-SI.pdf]

# Supporting Information

## Theoretical and Experimental Investigation of Thermodynamics and Kinetics of Thiol-Michael Addition Reactions: A Case Study of Reversible Fluorescent Probes for Glutathione Imaging in Single Cells

Jianwei Chen,<sup>†,‡</sup> Xiqian Jiang,<sup>†,‡</sup> Shaina L. Carroll,<sup>†,¶</sup> Jia Huang,<sup>§</sup> and Jin Wang<sup>†,§,\*</sup>

<sup>†</sup>Department of Pharmacology, <sup>§</sup>Center for Drug Discovery, Dan L. Duncan Cancer Center, and Cardiovascular Research Institute, Baylor College of Medicine, Houston, Texas 77030, United States;

<sup>¶</sup>Department of Chemistry, Rice University, Houston, Texas 77251, United States;

<sup>§</sup>Sciclotron LLC., Sugar Land, Texas 77479, United States.

<sup>‡</sup> These authors contributed equally.

Email: [wangj@bcm.edu](mailto:wangj@bcm.edu)

## Table of Contents

|                                                                                                                    |     |
|--------------------------------------------------------------------------------------------------------------------|-----|
| Materials and Methods .....                                                                                        | S3  |
| Scheme S1. Synthetic route of compounds 1-F, 1-NO <sub>2</sub> , 1-OH and 1-OH-AM.....                             | S3  |
| Scheme S2. A general scheme for the mechanism of thiol-Michael addition reaction. ....                             | S3  |
| Scheme S3. Definition of $\Delta G_1$ , $\Delta G_2$ and $\Delta G_3$ .....                                        | S4  |
| Table S1. Gibbs free energies for Michael addition reactions computed by M06-2X/6-31G(d).....                      | S5  |
| Table S2. Summary of energies calculated with different DFT methods.....                                           | S5  |
| Figure S1. Concentration dependent ratiometric spectra of 1-X in PBS.....                                          | S10 |
| Figure S2. Kinetics of forward and reverse reactions between GSH probes and GSH.....                               | S13 |
| Figure S3. Linear correlation between $\Delta G_2$ and $\log k_f$ .....                                            | S14 |
| Figure S4. Stable enolate intermediate of 1-OH-MeS <sup>-</sup> adduct.....                                        | S14 |
| Figure S5. Linear correlation between $-\Delta G_3$ and $\log k_r$ .....                                           | S15 |
| Figure S7. <sup>13</sup> C NMR (100 MHz, CDCl <sub>3</sub> ) spectrum of 1-F-ester.....                            | S17 |
| Figure S8. <sup>1</sup> H NMR (400 MHz, DMSO- <i>d</i> <sub>6</sub> ) spectrum of 1-F.....                         | S18 |
| Figure S9. <sup>13</sup> C NMR (100 MHz, DMSO- <i>d</i> <sub>6</sub> ) spectrum of 1-F.....                        | S19 |
| Figure S10. <sup>1</sup> H NMR (400 MHz, CDCl <sub>3</sub> ) spectrum of 1-NO <sub>2</sub> -ester.....             | S20 |
| Figure S11. <sup>13</sup> C NMR (100 MHz, CDCl <sub>3</sub> ) spectrum of 1-NO <sub>2</sub> -ester.....            | S21 |
| Figure S12. <sup>1</sup> H NMR (400 MHz, DMSO- <i>d</i> <sub>6</sub> ) spectrum of 1-NO <sub>2</sub> .....         | S22 |
| Figure S13. <sup>13</sup> C NMR (100 MHz, DMSO- <i>d</i> <sub>6</sub> ) spectrum of 1-NO <sub>2</sub> .....        | S23 |
| Figure S14. <sup>1</sup> H NMR (400 MHz, DMSO- <i>d</i> <sub>6</sub> ) spectrum of 1-OH.....                       | S24 |
| Figure S15. <sup>13</sup> C NMR (100 MHz, DMSO- <i>d</i> <sub>6</sub> ) spectrum of 1-OH.....                      | S25 |
| Figure S16. <sup>1</sup> H NMR (400 MHz, CDCl <sub>3</sub> ) spectrum of 1-OH-AM.....                              | S26 |
| Figure S17. <sup>13</sup> C NMR (100 MHz, DMSO- <i>d</i> <sub>6</sub> CDCl <sub>3</sub> ) spectrum of 1-OH-AM..... | S27 |
| Computational Methodology and Data .....                                                                           | S28 |
| References .....                                                                                                   | S82 |

## Materials and Methods

**Materials:** All the chemicals were purchased from Sigma-Aldrich or Alfa Aesar unless otherwise specified. All other solvents and reagents were used as obtained without further purification.

**Instrumentation:** NMR spectra were recorded on a Varian NMR ( $^1\text{H}$  at 400 MHz and  $^{13}\text{C}$  at 100 MHz) spectrometer. Chemical shifts ( $\delta$ ) were given in ppm with reference to solvent signals [ $^1\text{H}$  NMR:  $\text{CDCl}_3$  (7.26),  $\text{DMSO-}d_6$  (2.50);  $^{13}\text{C}$  NMR:  $\text{CDCl}_3$  (77.0),  $\text{DMSO-}d_6$  (40.0)]. UV-Vis measurements were performed in  $10 \times 10$  mm quartz cuvettes with a Cary 60 UV-Vis Spectrometer. Fluorescence measurements were performed in  $10 \times 10$  mm quartz cuvettes with a Cary Eclipse fluorescence spectrophotometer. Flash chromatography was performed on a Teledyne ISCO CombiFlash Rf 200. ESI mass spectrometry was measured on an Agilent Mass Spectrometer (6130 single quad). The Carl Zeiss LSM-780 confocal laser scanning microscope from the Optical Imaging and Vital Microscopy Core at Baylor College of Medicine was used for all cell imaging.

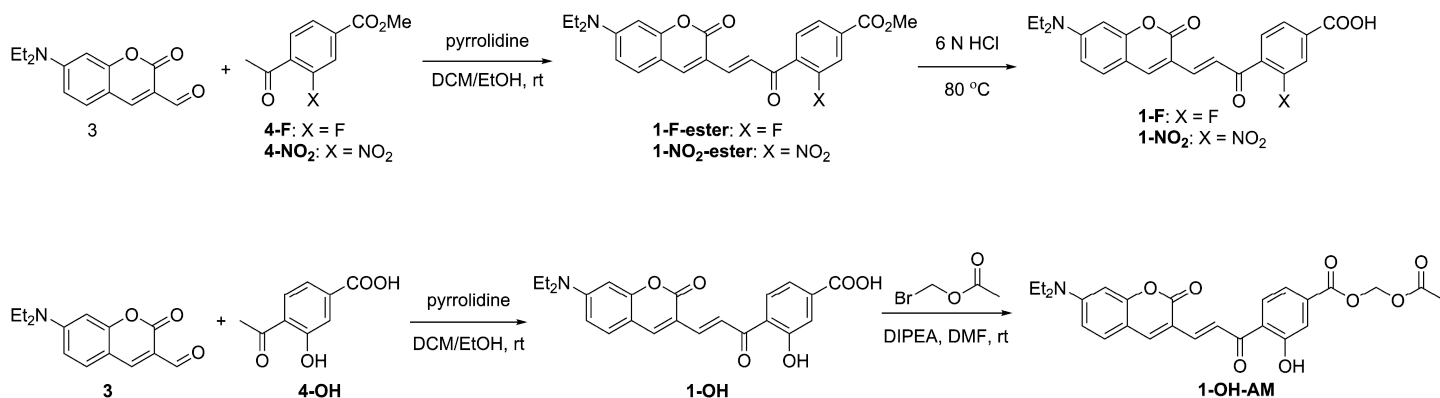

### Scheme S1. Synthetic route of compounds 1-F, 1-NO<sub>2</sub>, 1-OH and 1-OH-AM.

Compounds **1-H**<sup>S1</sup>, **1-Br**<sup>S1</sup>, **3**<sup>S1</sup>, **4-F**<sup>S2</sup>, **4-NO<sub>2</sub>**<sup>S3</sup> and **4-OH**<sup>S4</sup> were synthesized according to the literature.

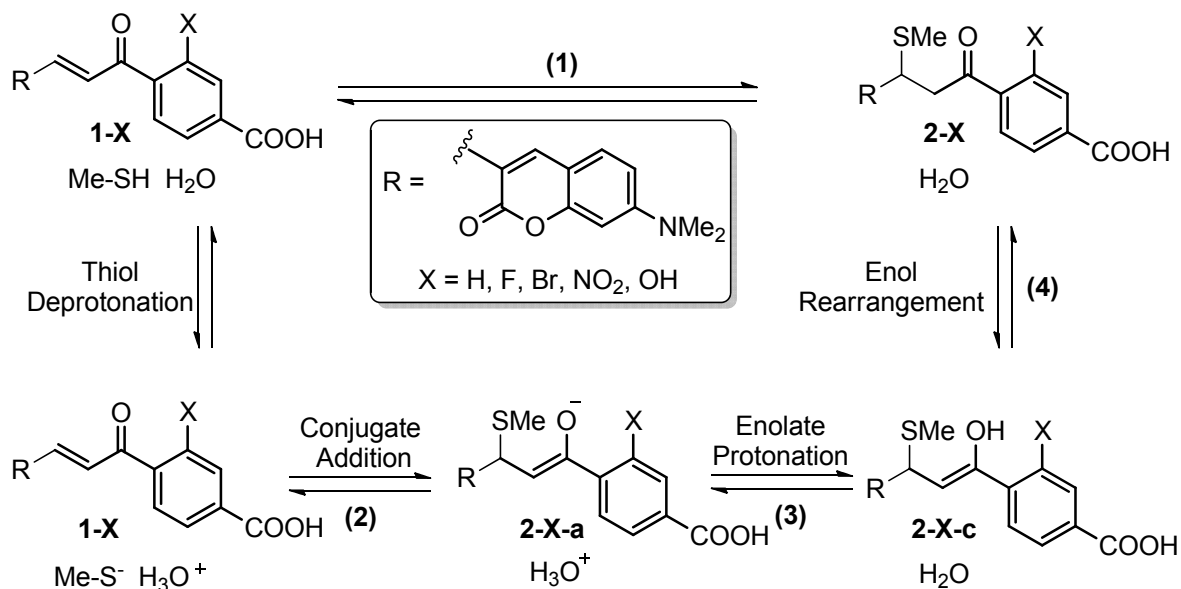

**Scheme S2.** A general scheme for the mechanism of thiol-Michael addition reaction. To simplify calculations, methyl groups were used as substitutes for the ethyl groups in the coumarin moiety.

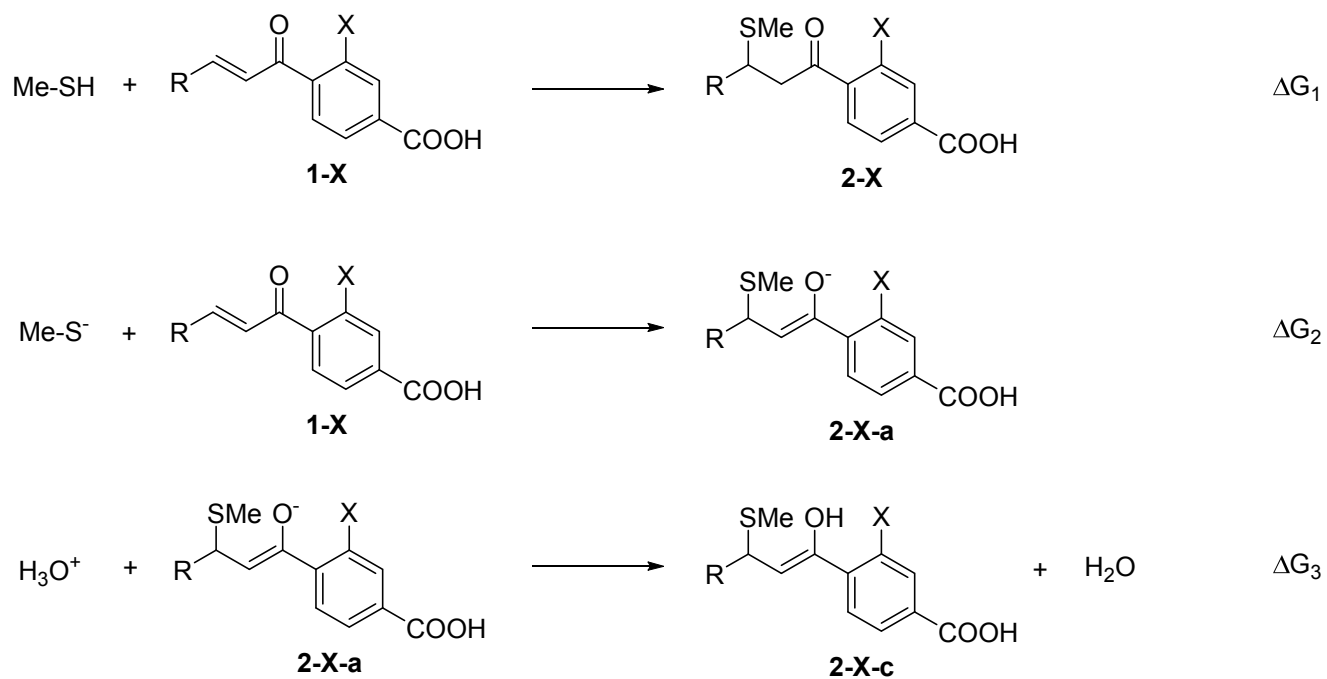

**Scheme S3.** Definition of  $\Delta G_1$ ,  $\Delta G_2$  and  $\Delta G_3$ .

**Table S1.** Gibbs free energies for Michael addition reactions computed by M06-2X/6-31G(d).

| <b>X</b>    | <b>1-X*</b>  | <b>1-X-a*</b> | <b>1-X-b*</b> | <b>2-X*</b>  |
|-------------|--------------|---------------|---------------|--------------|
| <b>Br**</b> | -3811.820694 | -4249.897932  | -4250.419190  | -4250.440404 |
| <b>H</b>    | -1240.634867 | -1678.782346  | -1679.236039  | -1679.251144 |
| <b>F</b>    | -1339.852664 | -1778.00102   | -1778.452895  | -1778.468107 |
| <b>Br</b>   | -3811.852090 | -4250.000578  | -4250.452588  | -4250.468143 |
| <b>NO2</b>  | -1445.063982 | -1883.215301  | -1883.666727  | -1883.678798 |
| <b>OH</b>   | -1315.840037 | -1753.993027  | -1754.437886  | -1754.455958 |

\*in Hartree

\*\*in the gas phase

**Table S2.** Summary of energies calculated with different DFT methods

| Entry                     | M06-2X/6-31G(d)   |                   |                              |                                |                                         | 6-311G(2d,p)               |                           |                             |                            |
|---------------------------|-------------------|-------------------|------------------------------|--------------------------------|-----------------------------------------|----------------------------|---------------------------|-----------------------------|----------------------------|
|                           | Electronic Energy | Zero-Point Energy | Thermal Correction to Energy | Thermal Correction to Enthalpy | Thermal Correction to Gibbs Free Energy | Electronic Energy (M06-2X) | Electronic Energy (B3LYP) | Electronic Energy (PBE1PBE) | Electronic Energy (wB97XD) |
| MeS <sup>-</sup>          | -438.156891       | 0.046987          | 0.040170                     | 0.041114                       | 0.013534                                | -438.2010694               | -438.2649071              | -438.0488223                | -438.2264258               |
| H3O <sup>+</sup>          | -76.809148        | 0.037134          | 0.037762                     | 0.038706                       | 0.015756                                | -76.84730862               | -76.88399972              | -76.80068734                | -76.86222575               |
| Water                     | -76.399062        | 0.021122          | 0.023957                     | 0.024901                       | 0.002800                                | -76.42628946               | -76.46091933              | -76.37612653                | -76.43705682               |
| MeSH                      | -438.631330       | 0.399029          | 0.050440                     | 0.051384                       | 0.022920                                | -438.6800671               | -438.7479387              | -438.5325888                | -438.7114735               |
| <b>1-H</b>                | -1240.924250      | 0.348154          | 0.367022                     | 0.367966                       | 0.289383                                | -1241.250336               | -1241.739484              | -1240.317300                | -1241.311241               |
| <b>2-H-a</b>              | -1679.105540      | 0.399732          | 0.409604                     | 0.410548                       | 0.323194                                | -1679.469350               | -1680.001325              | -1678.378198                | -1679.552080               |
| <b>2-H-b</b>              | -1679.572320      | 0.386117          | 0.422978                     | 0.423922                       | 0.336281                                | -1679.948366               | -1680.481677              | -1678.858926                | -1680.034870               |
| <b>2-H</b>                | -1679.588720      | 0.400840          | 0.423541                     | 0.424485                       | 0.337576                                | -1679.959726               | -1680.493873              | -1678.870356                | -1680.051661               |
| <b>1-Br</b>               | -3812.127200      | 0.343724          | 0.358414                     | 0.359358                       | 0.275110                                | -3814.812808               | -3815.269129              | -3813.526991                | -3814.872887               |
| <b>2-Br-a</b>             | -4250.312120      | 0.395833          | 0.401188                     | 0.402132                       | 0.311542                                | -4253.034184               | -4253.531535              | -4251.588924                | -4253.115731               |
| <b>2-Br-b</b>             | -4250.775650      | 0.396622          | 0.414057                     | 0.415001                       | 0.323062                                | -4253.510250               | -4254.011219              | -4252.068338                | -4253.596509               |
| <b>2-Br</b>               | -4250.794250      | 0.382761          | 0.415015                     | 0.415959                       | 0.326107                                | -4253.521703               | -4254.017505              | -4252.075671                | -4253.612006               |
| <b>1-F</b>                | -1340.131510      | 0.333465          | 0.359254                     | 0.360198                       | 0.278846                                | -1340.486735               | -1341.001976              | -1339.490882                | -1340.547370               |
| <b>2-F-a</b>              | -1778.314840      | 0.386819          | 0.402168                     | 0.403112                       | 0.313820                                | -1778.707848               | -1779.265224              | -1777.553221                | -1778.789989               |
| <b>2-F-b</b>              | -1778.780020      | 0.372968          | 0.415437                     | 0.416381                       | 0.327125                                | -1779.185253               | -1779.744924              | -1778.033330                | -1779.271449               |
| <b>2-F</b>                | -1778.796450      | 0.334953          | 0.416362                     | 0.417307                       | 0.328343                                | -1779.197230               | -1779.756629              | -1778.044316                | -1779.288350               |
| <b>1-NO<sub>2</sub></b>   | -1445.350420      | 0.387487          | 0.371763                     | 0.372708                       | 0.286438                                | -1445.731652               | -1446.290712              | -1444.664857                | -1445.798373               |
| <b>2-NO<sub>2</sub>-a</b> | -1883.537480      | 0.388610          | 0.414834                     | 0.415778                       | 0.322179                                | -1883.956001               | -1884.556957              | -1882.730324                | -1884.044237               |
| <b>2-NO<sub>2</sub>-b</b> | -1884.000190      | 0.385408          | 0.427620                     | 0.428564                       | 0.333463                                | -1884.431421               | -1885.033435              | -1883.207108                | -1884.523370               |
| <b>2-NO<sub>2</sub></b>   | -1884.014850      | 0.374460          | 0.428495                     | 0.429439                       | 0.336052                                | -1884.441482               | -1885.041168              | -1883.215366                | -1884.539159               |
| <b>1-OH</b>               | -1316.133060      | 0.397648          | 0.372262                     | 0.373206                       | 0.293023                                | -1316.484932               | -1316.997839              | -1315.502690                | -1316.546915               |
| <b>2-OH-a</b>             | -1754.319050      | 0.345551          | 0.413626                     | 0.414570                       | 0.326023                                | -1754.710625               | -1755.265114              | -1753.569670                | -1754.793300               |
| <b>2-OH-b</b>             | -1754.777150      | 0.385332          | 0.427833                     | 0.428777                       | 0.339264                                | -1755.178268               | -1755.734207              | -1754.038110                | -1755.265636               |
| <b>2-OH</b>               | -1754.796790      | 0.034898          | 0.428653                     | 0.429597                       | 0.340832                                | -1755.193801               | -1755.751408              | -1754.054746                | -1755.286624               |

\*in Hartree

### Synthesis of compound 1-F

To the mixture of compound **3** (20 mg, 0.082 mmol) and compound **4-F** (32 mg, 0.16 mmol) in dry DCM/EtOH (1:1, 2 mL) was added pyrrolidine (0.018 mL, 0.25 mmol). The mixture was stirred at room temperature for 3 d. Then the solvent was removed and the residue was purified by flash chromatography (hexanes/EtOAc = 4:1 to 3:1) to afford compound **1-F-ester** (15 mg, 43%). Compound **1-F-ester**:  $^1\text{H}$  NMR (400 MHz,  $\text{CDCl}_3$ )  $\delta$  7.93 – 7.86 (m, 2H), 7.86 – 7.75 (m, 3H), 7.60 (d,  $J = 15.6$  Hz, 1H), 7.32 (d,  $J = 8.8$  Hz, 1H), 6.61 (dd,  $J = 9.2, 2.4$  Hz, 1H), 6.48 (d,  $J = 2.4$  Hz, 1H), 3.95 (s, 3H), 3.45 (q,  $J = 7.2$  Hz, 4H), 1.23 (t,  $J = 7.2$  Hz, 6H);  $^{13}\text{C}$  NMR (100 MHz,  $\text{CDCl}_3$ )  $\delta$  189.1, 165.3, 160.6 (d,  $J = 254.2$  Hz), 160.1, 156.8, 152.1, 145.9, 140.8, 134.7, 131.4, 130.8 (d,  $J = 2.9$  Hz), 130.2, 125.7 (d,  $J = 5.6$  Hz), 125.2 (d,  $J = 3.6$  Hz), 117.8 (d,  $J = 25.0$  Hz), 114.5, 109.6, 108.9, 96.9, 52.6, 45.1 (2C), 12.5 (2C); MS (ESI):  $m/z$  424.2  $[\text{M}+1]^+$ ; HRMS (ESI):  $m/z$  calcd for  $\text{C}_{24}\text{H}_{23}\text{FNO}_5$   $[\text{M}+\text{H}]^+$ : 424.1560, found: 424.1562.

The mixture of compound **1-F-ester** (10 mg, 0.047 mmol) and 6 N HCl (2 ml) was stirred at 80 °C for 8 h. Then the solvent was removed and the residue was purified by HPLC to obtain compound **1-F** (7 mg, 72%).

Compound **1-F**:  $^1\text{H}$  NMR (400 MHz,  $\text{DMSO}-d_6$ )  $\delta$  8.34 (s, 1H), 7.84 (dd,  $J = 8.0, 1.3$  Hz, 1H), 7.78 – 7.74 (m, 2H), 7.60 (dd,  $J = 15.6, 2.0$  Hz, 1H), 7.46 (d,  $J = 14.0$  Hz, 1H), 7.43 (d,  $J = 8.8$  Hz, 1H), 6.73 (dd,  $J = 8.8, 2.0$  Hz, 1H), 6.53 (d,  $J = 1.6$  Hz, 1H), 3.43 (q,  $J = 7.2$  Hz, 4H), 1.09 (t,  $J = 7.2$  Hz, 6H);  $^{13}\text{C}$  NMR (101 MHz,  $\text{DMSO}-d_6$ )  $\delta$  189.1, 166.1 (d,  $J = 2.4$  Hz), 160.1, 160.0 (d,  $J = 251.3$  Hz), 157.1, 152.7, 147.6, 142.1, 136.1 (d,  $J = 7.7$  Hz), 131.4, 131.3 (d,  $J = 14.7$  Hz), 131.1 (d,  $J = 2.9$  Hz), 126.0 (d,  $J = 3.2$  Hz), 124.8 (d,  $J = 4.3$  Hz), 117.6 (d,  $J = 24.1$  Hz), 113.0, 110.5, 108.9, 96.7, 44.9 (2C), 12.9 (2C); MS (ESI):  $m/z$  410.1  $[\text{M}+1]^+$ ; HRMS (ESI):  $m/z$  calcd for  $\text{C}_{23}\text{H}_{21}\text{FNO}_5$   $[\text{M}+\text{H}]^+$ : 410.1404, found: 410.1408.

### Synthesis of compound 1-NO<sub>2</sub>

To the mixture of compound **3** (20 mg, 0.082 mmol) and compound **4-NO<sub>2</sub>** (33 mg, 0.15 mmol) in dry DCM/EtOH (1:1, 2 mL) was added pyrrolidine (0.0092 mL, 8.7 mmol). The mixture was stirred at room temperature for 3 d. Then the solvent was removed and the residue was purified by flash chromatography (hexanes/EtOAc = 4:1 to 3:1) to afford compound **1-NO<sub>2</sub>-ester** (23 mg, 63%). Compound **1-NO<sub>2</sub>-ester**:  $^1\text{H}$  NMR (400 MHz,  $\text{CDCl}_3$ )  $\delta$  8.76 (d,  $J = 1.2$  Hz, 1H), 8.36 (dd,  $J = 7.6, 1.6$  Hz, 1H), 7.78 (s, 1H), 7.59 (d,  $J = 8.0$  Hz, 1H), 7.45 (d,  $J = 16.0$  Hz, 1H), 7.32 (d,  $J = 16.0$  Hz, 1H), 7.31 (d,  $J = 9.2$  Hz, 1H), 6.61 (dd,  $J = 8.8, 2.4$  Hz, 1H), 6.46 (d,  $J = 2.0$  Hz, 1H), 4.01 (s, 3H), 3.45 (q,  $J = 7.2$  Hz, 4H), 1.23 (t,  $J = 7.2$  Hz, 6H);  $^{13}\text{C}$  NMR (100 MHz,  $\text{CDCl}_3$ )  $\delta$  191.9, 164.4, 160.1, 156.9, 152.3, 146.8, 145.5, 141.5, 140.5, 134.5, 132.4, 130.3, 129.0, 125.6, 125.1, 113.7, 109.7, 108.8, 96.9, 52.9, 45.1 (2C), 12.4 (2C); MS (ESI):  $m/z$  451.2  $[\text{M}+1]^+$ ; HRMS (ESI):  $m/z$  calcd for  $\text{C}_{24}\text{H}_{23}\text{N}_2\text{O}_7$   $[\text{M}+\text{H}]^+$ : 451.1505, found: 451.1505.

The mixture of compound **1-NO<sub>2</sub>-ester** (10 mg) and 6 N HCl (2 ml) was stirred at 80 °C for 3 h. And then the solvent was removed and the residue was purified by HPLC to obtain compound **1-NO<sub>2</sub>** (6 mg, 62%).

Compound **1-NO<sub>2</sub>**:  $^1\text{H}$  NMR (400 MHz,  $\text{DMSO}-d_6$ )  $\delta$  8.57 (s, 1H), 8.37 (d,  $J = 7.6$  Hz, 1H), 8.33 (s, 1H), 7.79 (d,  $J = 7.6$  Hz, 1H), 7.44 (d,  $J = 8.8$  Hz, 1H), 7.39 (d,  $J = 16.0$  Hz, 1H), 7.24 (d,  $J = 16.0$  Hz, 1H), 6.78 (d,  $J = 8.8$  Hz, 1H), 6.58 (s, 1H), 3.48 (d,  $J = 6.8$  Hz, 4H), 1.13 (t,  $J = 6.8$  Hz, 6H);  $^{13}\text{C}$  NMR (100 MHz,  $\text{DMSO}-d_6$ )  $\delta$  192.2, 165.5, 159.9, 157.1, 152.8, 147.0, 143.3, 139.4, 135.1, 133.7, 131.4, 130.0, 125.6, 124.9, 112.5, 110.5, 110.0, 108.8, 96.6, 44.8 (2C), 12.8 (2C); MS (ESI):  $m/z$  437.1  $[\text{M}+1]^+$ ; HRMS (ESI):  $m/z$  calcd for  $\text{C}_{23}\text{H}_{21}\text{N}_2\text{O}_7$   $[\text{M}+\text{H}]^+$ : 437.1349, found: 437.1346.

### Synthesis of compound 1-OH

To a solution of **3** (100 mg, 0.41 mmol) and compound **4-OH** (81 mg, 0.45 mmol) in  $\text{CH}_2\text{Cl}_2/\text{EtOH}$  (1:1, v/v, 2 mL) was added pyrrolidine (0.45 mmol, 0.038 mL). The resulting solution was stirred at r.t. for 24 h. Then the solvent was removed under vacuum. The crude product was then purified by reverse phase chromatography (C18 column, elute with ACN in water 5-40%) to obtain compound **1-OH** (40 mg, 24%). Compound **1-OH**:  $^1\text{H}$  NMR (400 MHz,  $\text{DMSO}-d_6$ )  $\delta$  13.32 (br s, 1H), 12.05 (s, 1H), 8.47 (s, 1H), 8.03 (d,  $J = 15.6$  Hz, 1H), 7.94 (d,  $J = 8.0$  Hz, 1H), 7.69 (d,  $J = 15.2$  Hz, 1H), 7.51 (s, 1H), 7.49 (m, 2H), 6.80 (dd,  $J = 8.8, 2.0$  Hz, 1H), 6.60 (d,  $J = 1.6$  Hz, 1H), 3.49 (q,  $J = 7.2$  Hz, 4H), 1.15 (t,  $J = 7.2$  Hz, 6H);  $^{13}\text{C}$  NMR (100 MHz,  $\text{DMSO}-d_6$ )  $\delta$  192.7, 166.4, 159.8, 159.8, 156.6, 152.2, 146.4, 140.6, 136.2, 130.9, 130.2, 125.6, 121.5, 119.6, 118.1, 112.8, 110.1, 108.4, 96.2, 44.4 (2C), 12.4 (2C); MS (ESI):  $m/z$  408.1  $[\text{M}+1]^+$ ; HRMS (ESI):  $m/z$  calcd for  $\text{C}_{23}\text{H}_{22}\text{NO}_6$   $[\text{M}+\text{H}]^+$ : 408.1447, found: 408.1453.

## Synthesis of compound 1-OH-AM:

To a solution of compound **1-OH** (10 mg, 0.025 mmol) in anhydrous DMF (1 mL) were added bromomethyl acetate (0.014 mL, 0.15 mmol) and DIPEA (0.026 mL, 0.15 mmol). The reaction mixture was allowed to stir at room temperature overnight, and then concentrated under reduced pressure. The residue was purified by flash column chromatography (elute with ethyl acetate in hexane 10-50%) to afford **1-OH-AM** (6.0 mg, 52%); <sup>1</sup>H NMR (400 MHz, CDCl<sub>3</sub>) δ 12.92 (s, 1H), 8.37 (d, *J* = 14.8 Hz, 1H), 8.09 (d, *J* = 8.4 Hz, 1H), 7.83 (s, 1H), 7.74 (d, *J* = 15.2 Hz, 1H), 7.68 (d, *J* = 1.2 Hz, 1H), 7.59 (dd, *J* = 8.4, 1.6 Hz, 1H), 7.36 (d, *J* = 8.8 Hz, 2H), 6.64 (dd, *J* = 8.8, 2.4 Hz, 1H), 6.52 (d, *J* = 2.0 Hz, 1H), 6.00 (s, 2H), 3.47 (q, *J* = 7.2 Hz, 4H), 2.15 (s, 3H), 1.25 (t, *J* = 7.2 Hz, 6H); <sup>13</sup>C NMR (100 MHz, CDCl<sub>3</sub>) δ 194.2, 169.5, 164.2, 163.0, 160.0, 156.8, 152.4, 147.6, 142.0, 135.0, 130.4, 130.2, 123.5, 120.8, 120.1, 119.6, 114.3, 109.8, 109.0, 96.9, 79.9, 45.1, 20.7 (2C), 12.5 (2C); MS (ESI): *m/z* 480.2 [M+1]<sup>+</sup>; HRMS (ESI): *m/z* calcd for C<sub>26</sub>H<sub>26</sub>NO<sub>8</sub> [M+H]<sup>+</sup>: 480.1658, found: 480.1673.

## Determination of *K<sub>d</sub>* of probes with GSH

The probe solution was mixed with a solution of GSH under anaerobic condition in a glovebox. The final probe concentrations were 16 μM (**1-H**), 16 μM (**1-F**), 15 μM (**1-Br**), 12 μM (**1-NO<sub>2</sub>**), and 15 μM (**1-OH**), respectively. The probe concentration was adjusted to ensure similar initial absorption. The GSH concentration varied from 0-80 mM (0, 0.2, 0.5, 1.0, 2.0, 4.0, 8.0, 10, 16, 20, and 80 mM), respectively. After 24 h, UV-Vis spectra of the mixture were taken.

## Determination of Reaction Kinetics of probes with GSH

Forward reaction rate constants *k<sub>f</sub>* were determined by monitoring absorption changes of GSH probes **1-X** after mixing with GSH (2 mM in PBS at the final concentration); reverse reaction rate constants *k<sub>r</sub>* were measured by monitoring absorption changes of pre-equilibrated mixtures of GSH probes **1-X** and GSH upon addition of 5,6-dihydro-2H-pyran-2-one, a GSH scavenger.

## Cell Culture and Treatment for Imaging:

HeLa cells used in this study were purchased from American Type Culture Collection (ATCC) and grown in DMEM (Gibco, 11965) media supplemented with 10% FBS and 1% 1003 Pen Strep (Gibco). Cells were cultured under a controlled atmosphere (37°C, 5% CO<sub>2</sub>). Glass bottom dishes were used for cell culture due to confocal scanning requirements. Cells were treated with **1-OH-AM** (1 μM with 1% DMSO in culture media) for 30 min, followed by one washing step with trypan blue prior to imaging. Fluorescent images were acquired with 405 nm laser / 418 - 495 nm filter and 488 nm laser / 499 - 695 nm filter. All the microscope settings were kept consistent in each experiment.

## Deduction of Ratiometric Quantification

The reversible reaction equation is:

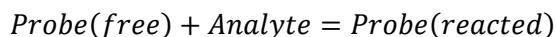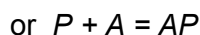

According to the reaction equation, the dissociation constant is:

$$K_d = \frac{[P][A]}{[AP]}$$

[*P*] and [*AP*] are the concentrations of free and reacted probes, respectively.

The absorptions at the two peak wavelengths are:

$$A_{\lambda 1} = \varepsilon_{P,\lambda 1}[P] + \varepsilon_{AP,\lambda 1}[AP]$$

$$A_{\lambda 2} = \varepsilon_{P,\lambda 2}[P] + \varepsilon_{AP,\lambda 2}[AP]$$

ε is the molar absorption coefficient, Subscripts *P*. and *AP*. stands for free and reacted probes, respectively.

The ratio can be described as:

$$R = \frac{A_{\lambda_1}}{A_{\lambda_2}} = \frac{\varepsilon_{P,\lambda_1}[P] + \varepsilon_{AP,\lambda_1}[AP]}{\varepsilon_{P,\lambda_2}[P] + \varepsilon_{AP,\lambda_2}[AP]}$$

From the dissociation constant, we can substitute all  $[P]$  with  $[AP]$ :

$$[AP] = [P][A]/K_d$$

$$R = \frac{\varepsilon_{P,\lambda_1} + \frac{\varepsilon_{AP,\lambda_1}}{K_d} [A]}{\varepsilon_{P,\lambda_2} + \frac{\varepsilon_{AP,\lambda_2}}{K_d} [A]}$$

So, the absorption ratio should fit in the following equation, which does not have a linear relationship to the analyte concentration:

$$R = \frac{\varepsilon_{P,\lambda_1}}{\varepsilon_{P,\lambda_2}} + \frac{\varepsilon_{AP,\lambda_1} - \frac{\varepsilon_{AP,\lambda_1}}{\varepsilon_{AP,\lambda_2}} \varepsilon_{P,\lambda_2}}{\varepsilon_{P,\lambda_2} + \frac{\varepsilon_{AP,\lambda_2}}{K_d} [A]} = P + \frac{Q}{S + T[A]}$$

The equation can be reduced to a linear fit when  $\varepsilon_{AP,\lambda_2} = 0$  or  $K_d$  is much larger than the analyte concentration.

Otherwise, the analyte concentration and  $R$  follows the relationship below:

$$[A] = K_d \left( \frac{R - \left( \frac{\varepsilon_{P,\lambda_1}}{\varepsilon_{P,\lambda_2}} \right)}{\left( \frac{\varepsilon_{AP,\lambda_1}}{\varepsilon_{AP,\lambda_2}} \right) - R} \right) \left( \frac{\varepsilon_{P,\lambda_2}}{\varepsilon_{AP,\lambda_2}} \right)$$

When there is no analyte present, only pure probe contributes to the absorbance:

$$A_{\lambda_1} = \varepsilon_{P,\lambda_1}[P]$$

$$A_{\lambda_2} = \varepsilon_{P,\lambda_2}[P]$$

$$R = \frac{\varepsilon_{P,\lambda_1}[P]}{\varepsilon_{P,\lambda_2}[P]} = \frac{\varepsilon_{P,\lambda_1}}{\varepsilon_{P,\lambda_2}} = R_{min}$$

When all the probe is saturated by analyte, only the bound probe contributes to the absorbance:

$$A_{\lambda_1} = \varepsilon_{AP,\lambda_1}[AP]$$

$$A_{\lambda_2} = \varepsilon_{AP,\lambda_2}[AP]$$

$$R = \frac{\varepsilon_{AP,\lambda_1}[AP]}{\varepsilon_{AP,\lambda_2}[AP]} = \frac{\varepsilon_{AP,\lambda_1}}{\varepsilon_{AP,\lambda_2}} = R_{max}$$

Combined all the above:

$$[A] = K_d \left( \frac{R - R_{min}}{R_{max} - R} \right) \left( \frac{\varepsilon_{P,\lambda_2}}{\varepsilon_{AP,\lambda_2}} \right)$$

$$[A] = K_d' \frac{R - R_{min}}{R_{max} - R}$$

Specific to **1-X**,  $\lambda_1 = 405$  nm, and  $\lambda_2 = 488$  nm.



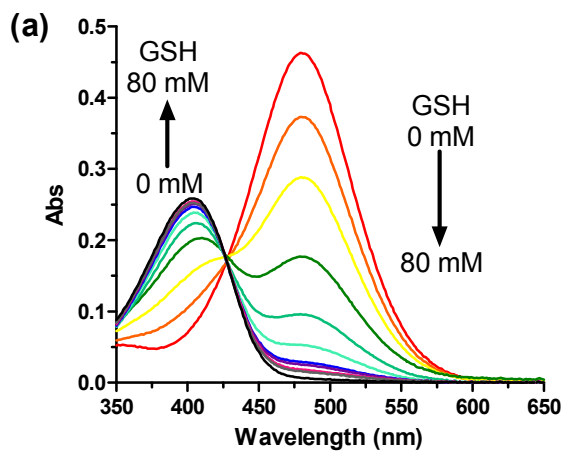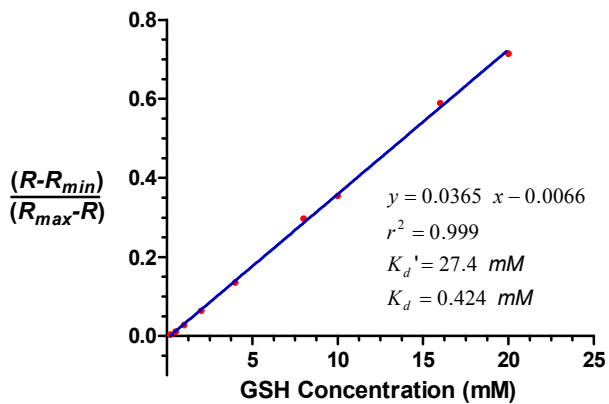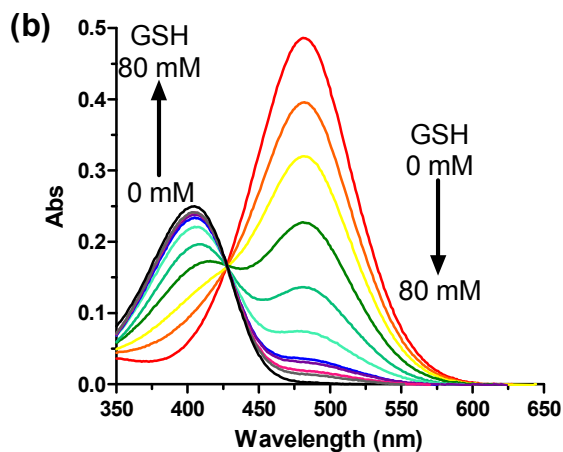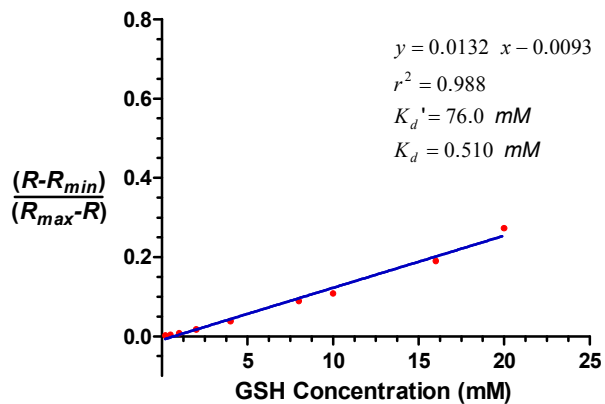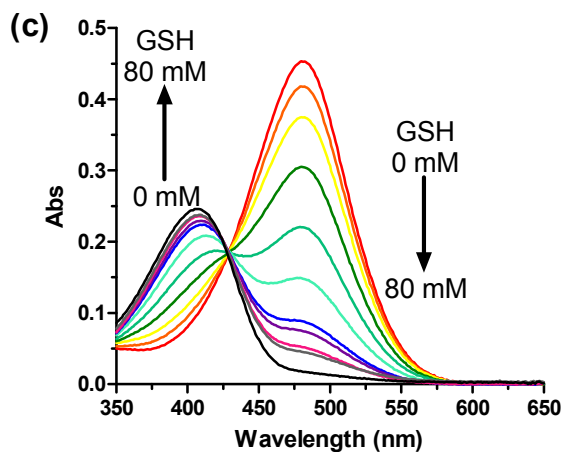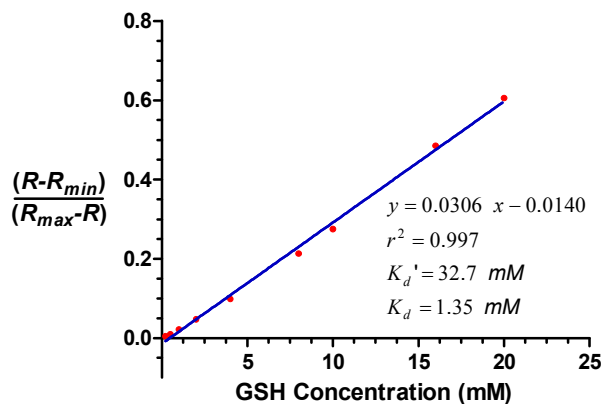

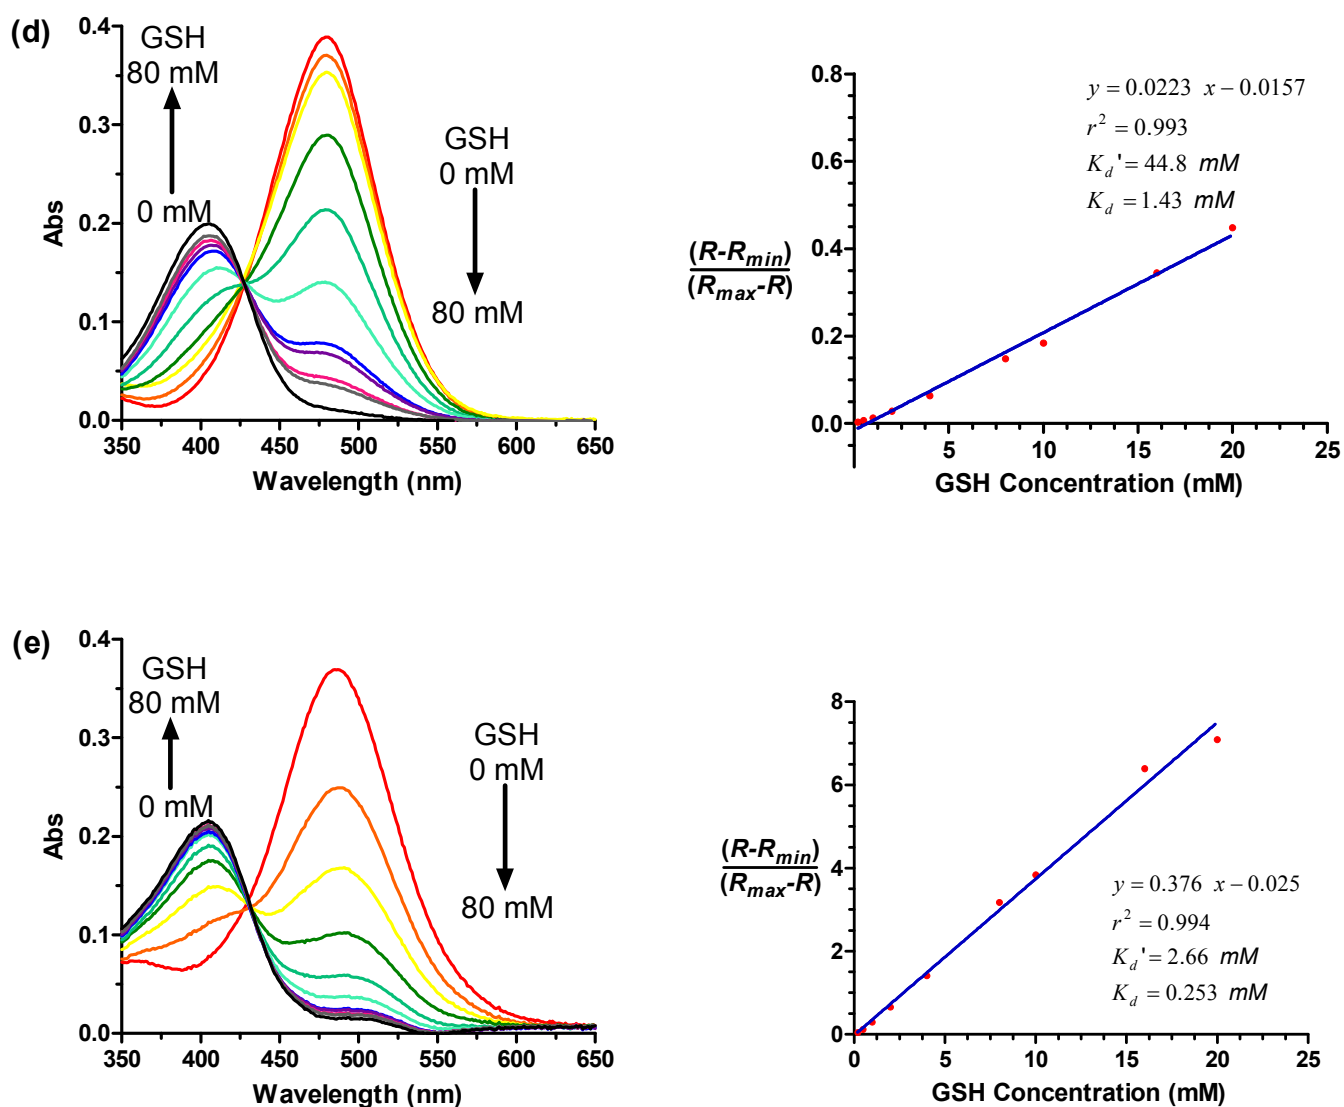

**Figure S1.** Concentration dependent ratiometric spectra of **1-X** in PBS under anaerobic conditions for 24 h (left). Linear relationship between  $(R-R_{min})/(R_{max}-R)$  and GSH concentration (right). (a) **1-H**, (b) **1-F**, (c) **1-Br**, (d) **1-NO<sub>2</sub>**, (e) **1-OH**. Theoretically, all the lines should go through the origin. Deviation from the origin is due to random errors in experimental measurements. If the linear fitting is forced to go through the origin, less than 5% of difference in slope can be observed.

The ratio between the absorbance at two wavelengths, 405 nm and 488 nm, was calculated and recorded as  $R$ .  $R_{max}$  represents the ratio when GSH is 80 mM;  $R_{min}$  represents the ratio when GSH is 0 mM. Plotting  $(R-R_{min})/(R_{max}-R)$  as a function of GSH concentration afforded a linear relationship. The reciprocal of the slope yields  $K_d'$ . It is assumed that at a GSH concentration of 80 mM, all the probe molecules are fully converted to the probe GSH adduct probe-GSH. Comparing the absorption values of probe and probe-GSH at 488 nm, we can calculate the value of  $\frac{\epsilon_{probe,488\text{ nm}}}{\epsilon_{probe-GSH,488\text{ nm}}}$

Based on the relationship

$$K_d' = K_d \frac{\epsilon_{probe,488\text{ nm}}}{\epsilon_{probe-GSH,488\text{ nm}}}$$

We can deduce  $K_d$  and the corresponding  $\Delta G$ .

The values used for the above calculations are listed below:

| <b>X</b>   | $K_d'$ (mM) | $\frac{\epsilon_{probe,488\text{ nm}}}{\epsilon_{probe-GSH,488\text{ nm}}}$ | $K_d$ (mM) | $\Delta G_1$ (kcal·mol <sup>-1</sup> ) |
|------------|-------------|-----------------------------------------------------------------------------|------------|----------------------------------------|
| <b>H</b>   | 27.4        | 64.6                                                                        | 0.424      | -4.67                                  |
| <b>F</b>   | 76.0        | 149                                                                         | 0.510      | -4.56                                  |
| <b>Br</b>  | 32.7        | 24.2                                                                        | 1.35       | -3.97                                  |
| <b>NO2</b> | 44.8        | 31.4                                                                        | 1.43       | -3.94                                  |
| <b>OH</b>  | 2.66        | 10.5                                                                        | 0.253      | -4.98                                  |

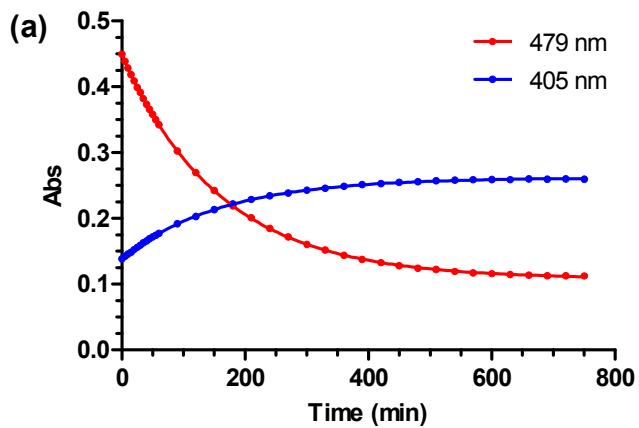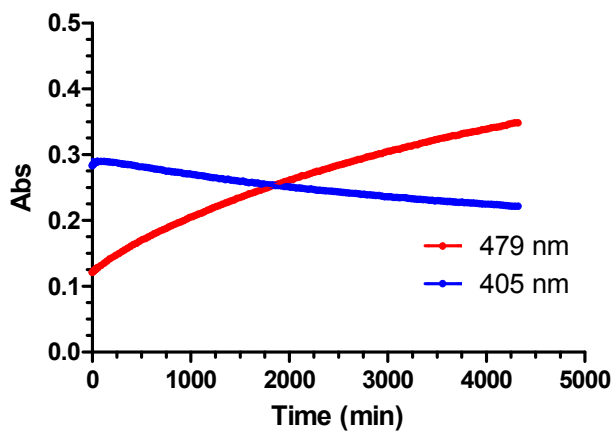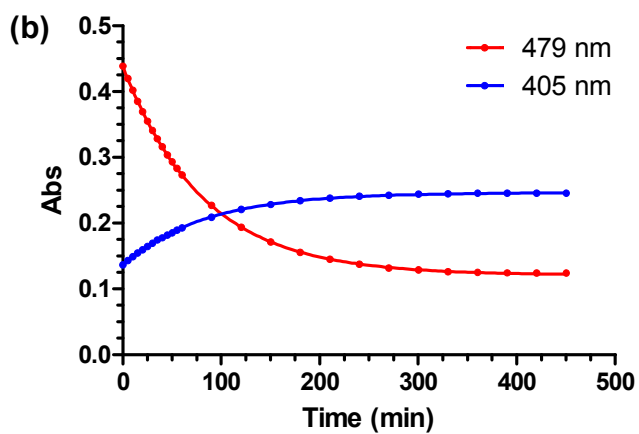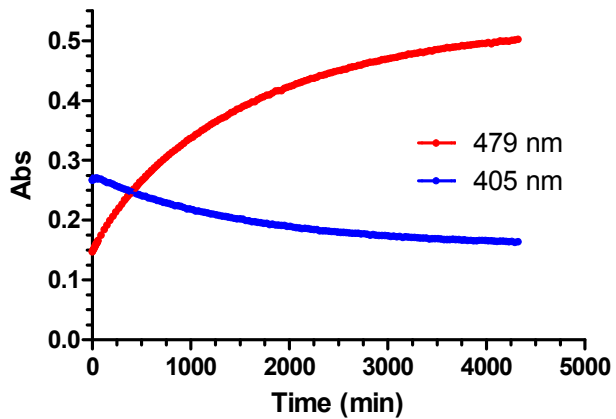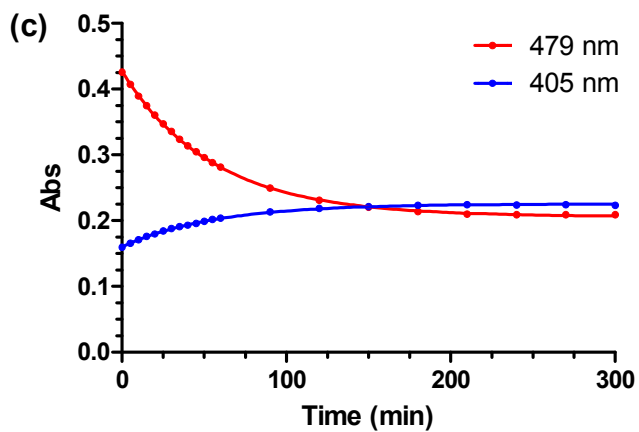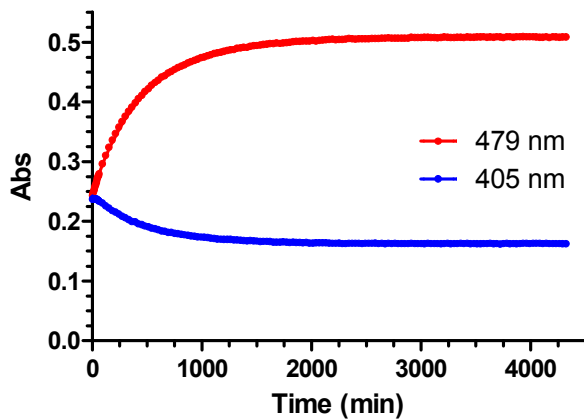

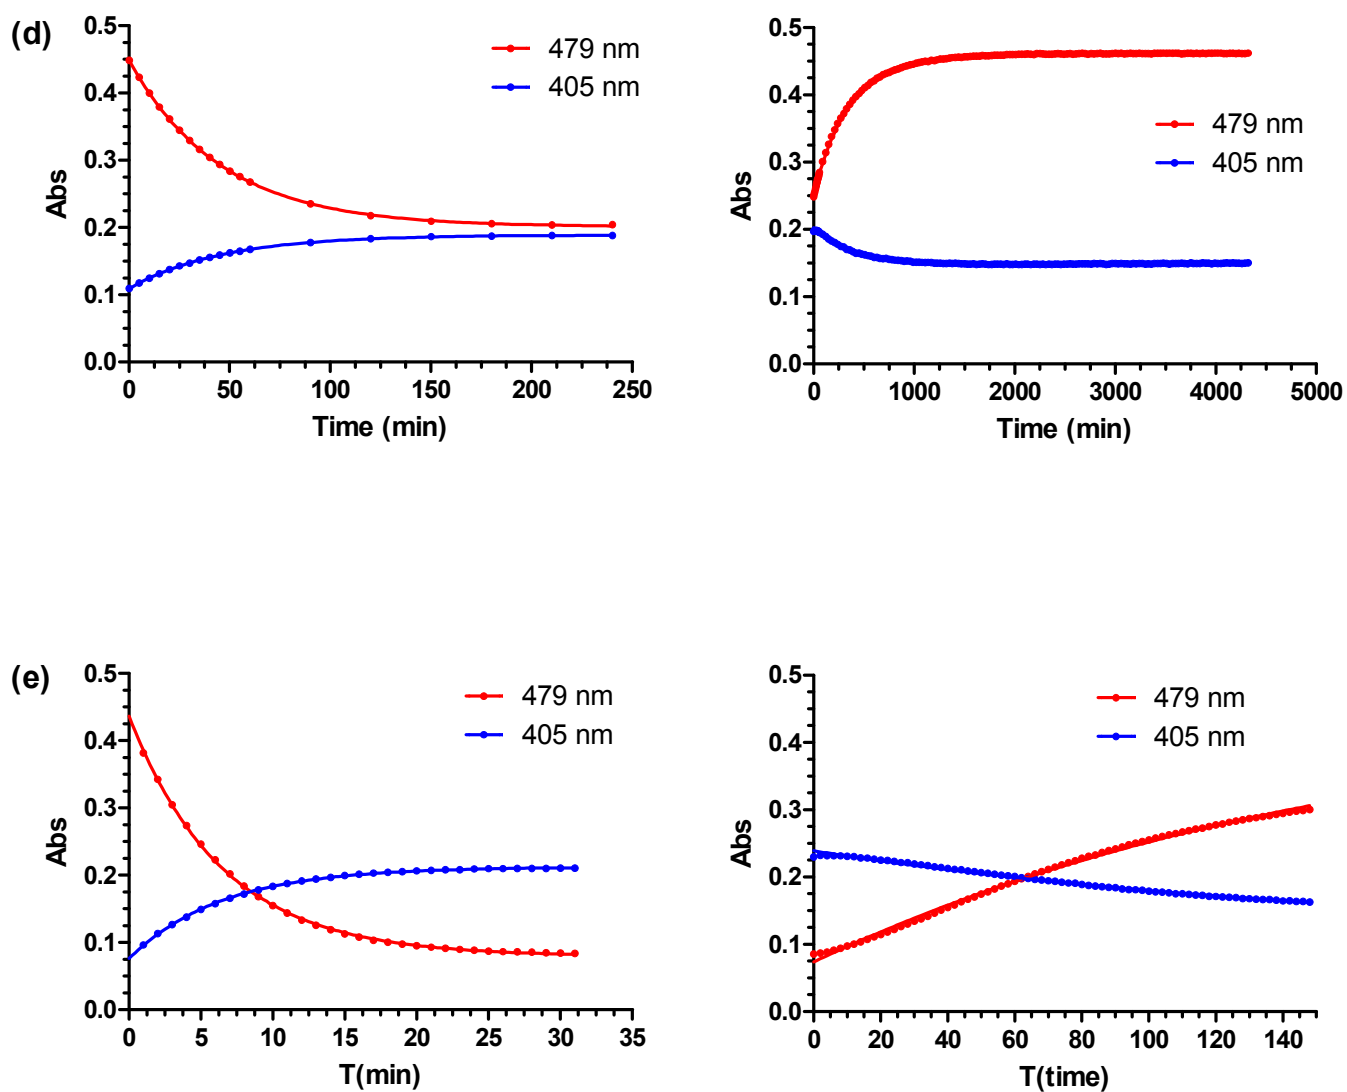

**Figure S2.** Kinetics of forward (left) and reverse (right) reactions between GSH probes and GSH (2 mM) in PBS (pH 7.4). (a) **1-H**, (b) **1-F**, (c) **1-Br**, (d) **1-NO<sub>2</sub>**, (e) **1-OH**.

The data obtained from the kinetic traces above are listed below:

| <b>X</b>              | $k_f/(M^{-1}s^{-1})$ | $\log [k_f/(M^{-1}\cdot s^{-1})]$ | $k_r/(10^{-6}\cdot s^{-1})$ | $\log [k_r/s^{-1}]$ |
|-----------------------|----------------------|-----------------------------------|-----------------------------|---------------------|
| <b>H</b>              | 0.052                | -1.28                             | 4.70                        | -5.33               |
| <b>F</b>              | 0.10                 | -1.00                             | 11.5                        | -4.94               |
| <b>Br</b>             | 0.15                 | -0.82                             | 35.7                        | -4.45               |
| <b>NO<sub>2</sub></b> | 0.18                 | -0.74                             | 46.6                        | -4.33               |
| <b>OH</b>             | 1.29                 | -0.11                             | 6050                        | -2.22               |

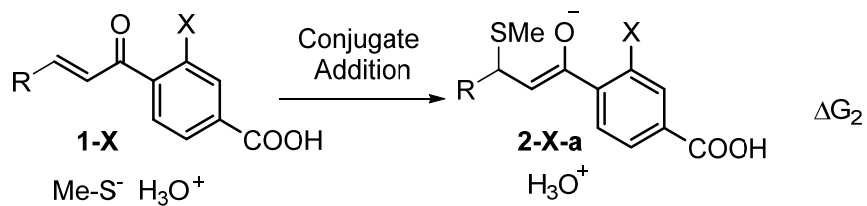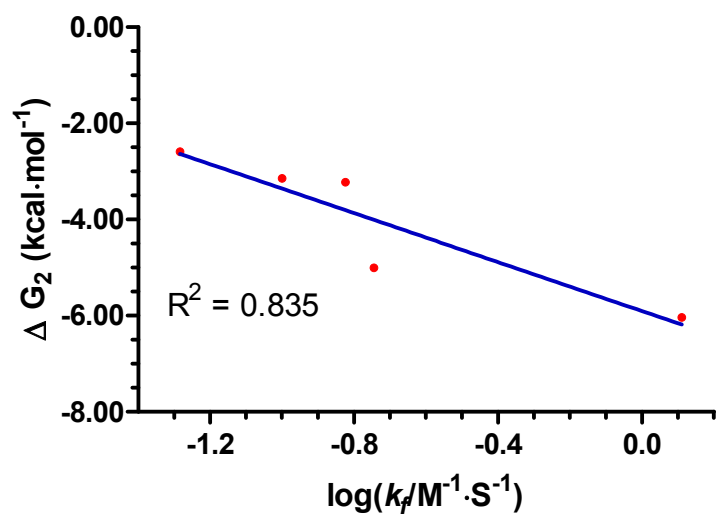

**Figure S3.** Linear correlation between  $\Delta G_2$  and  $\log k_f$ .

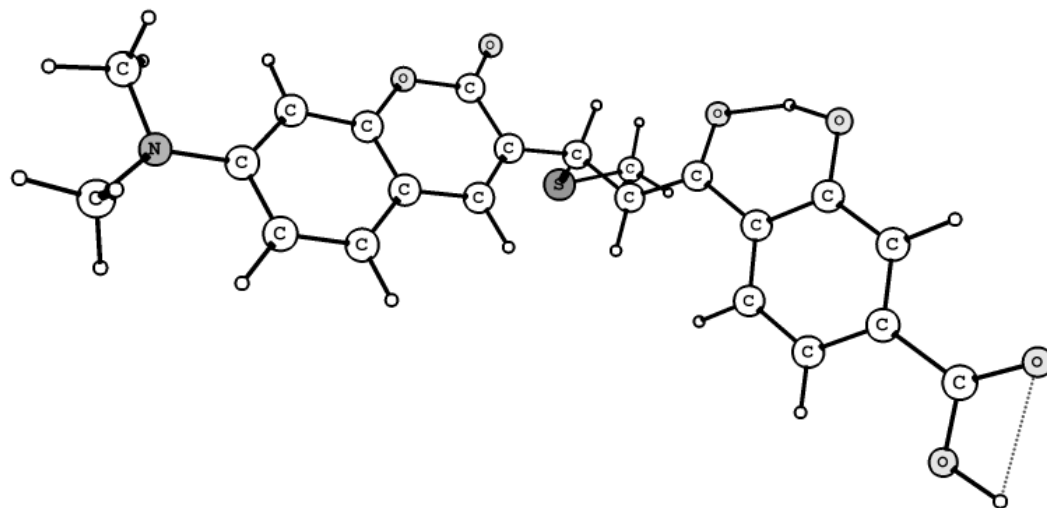

**Figure S4.** Stable enolate intermediate of 1-OH-MeS<sup>-</sup> adduct (computational model)

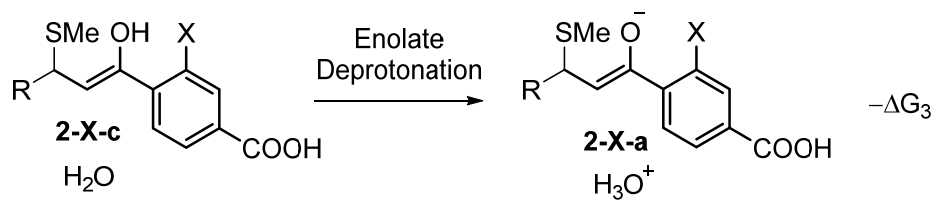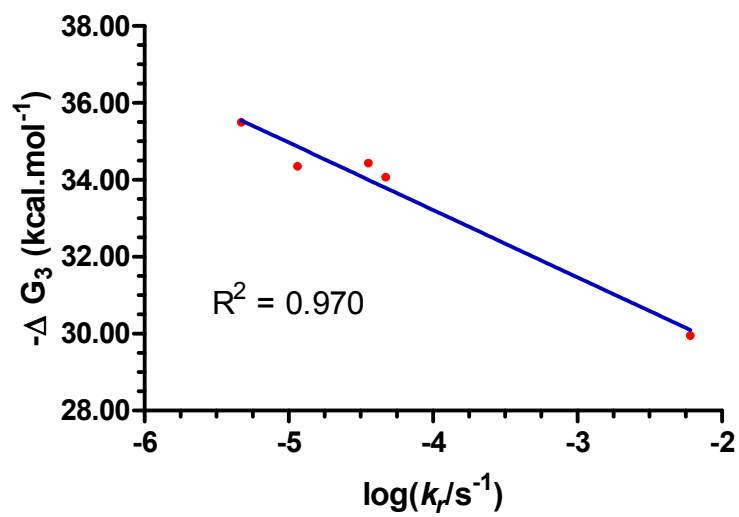

**Figure S5.** Linear correlation between  $-\Delta G_3$  and  $\log k_r$ .

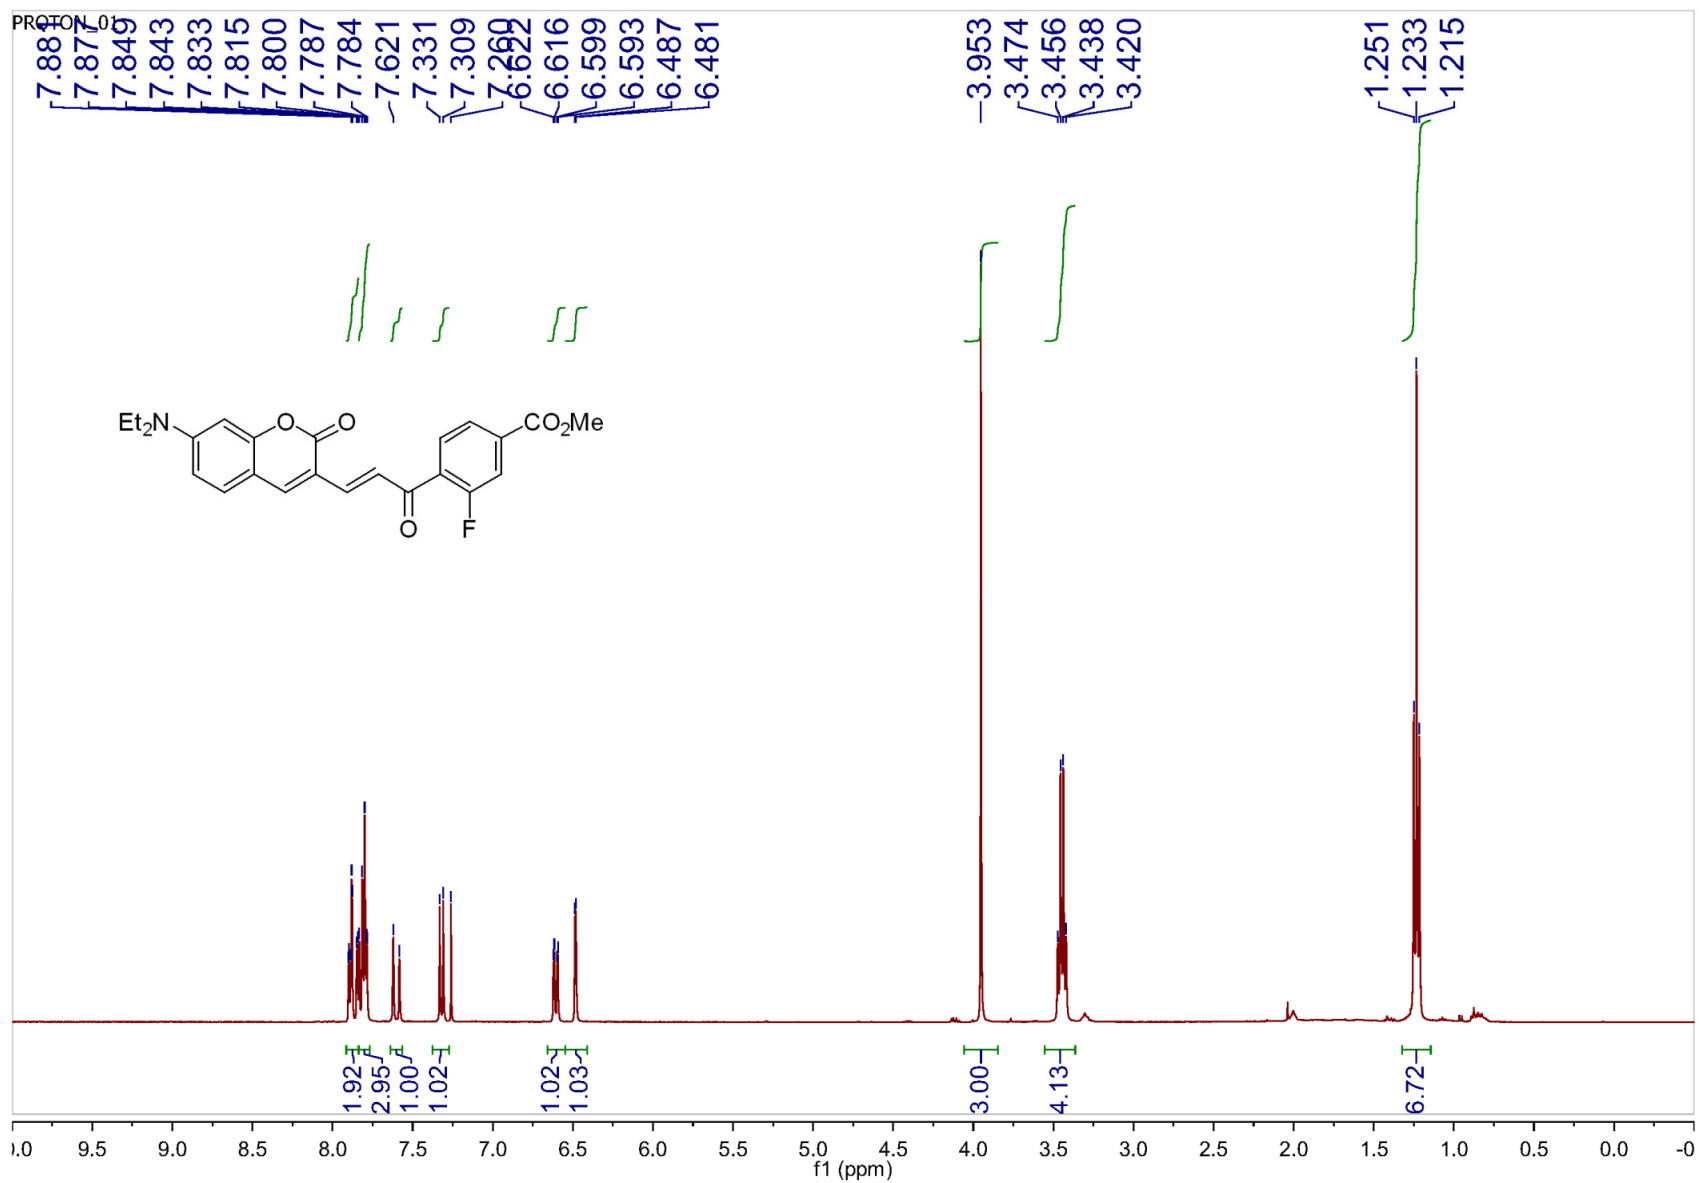

Figure S6. <sup>1</sup>H NMR (400 MHz, CDCl<sub>3</sub>) spectrum of 1-F-ester



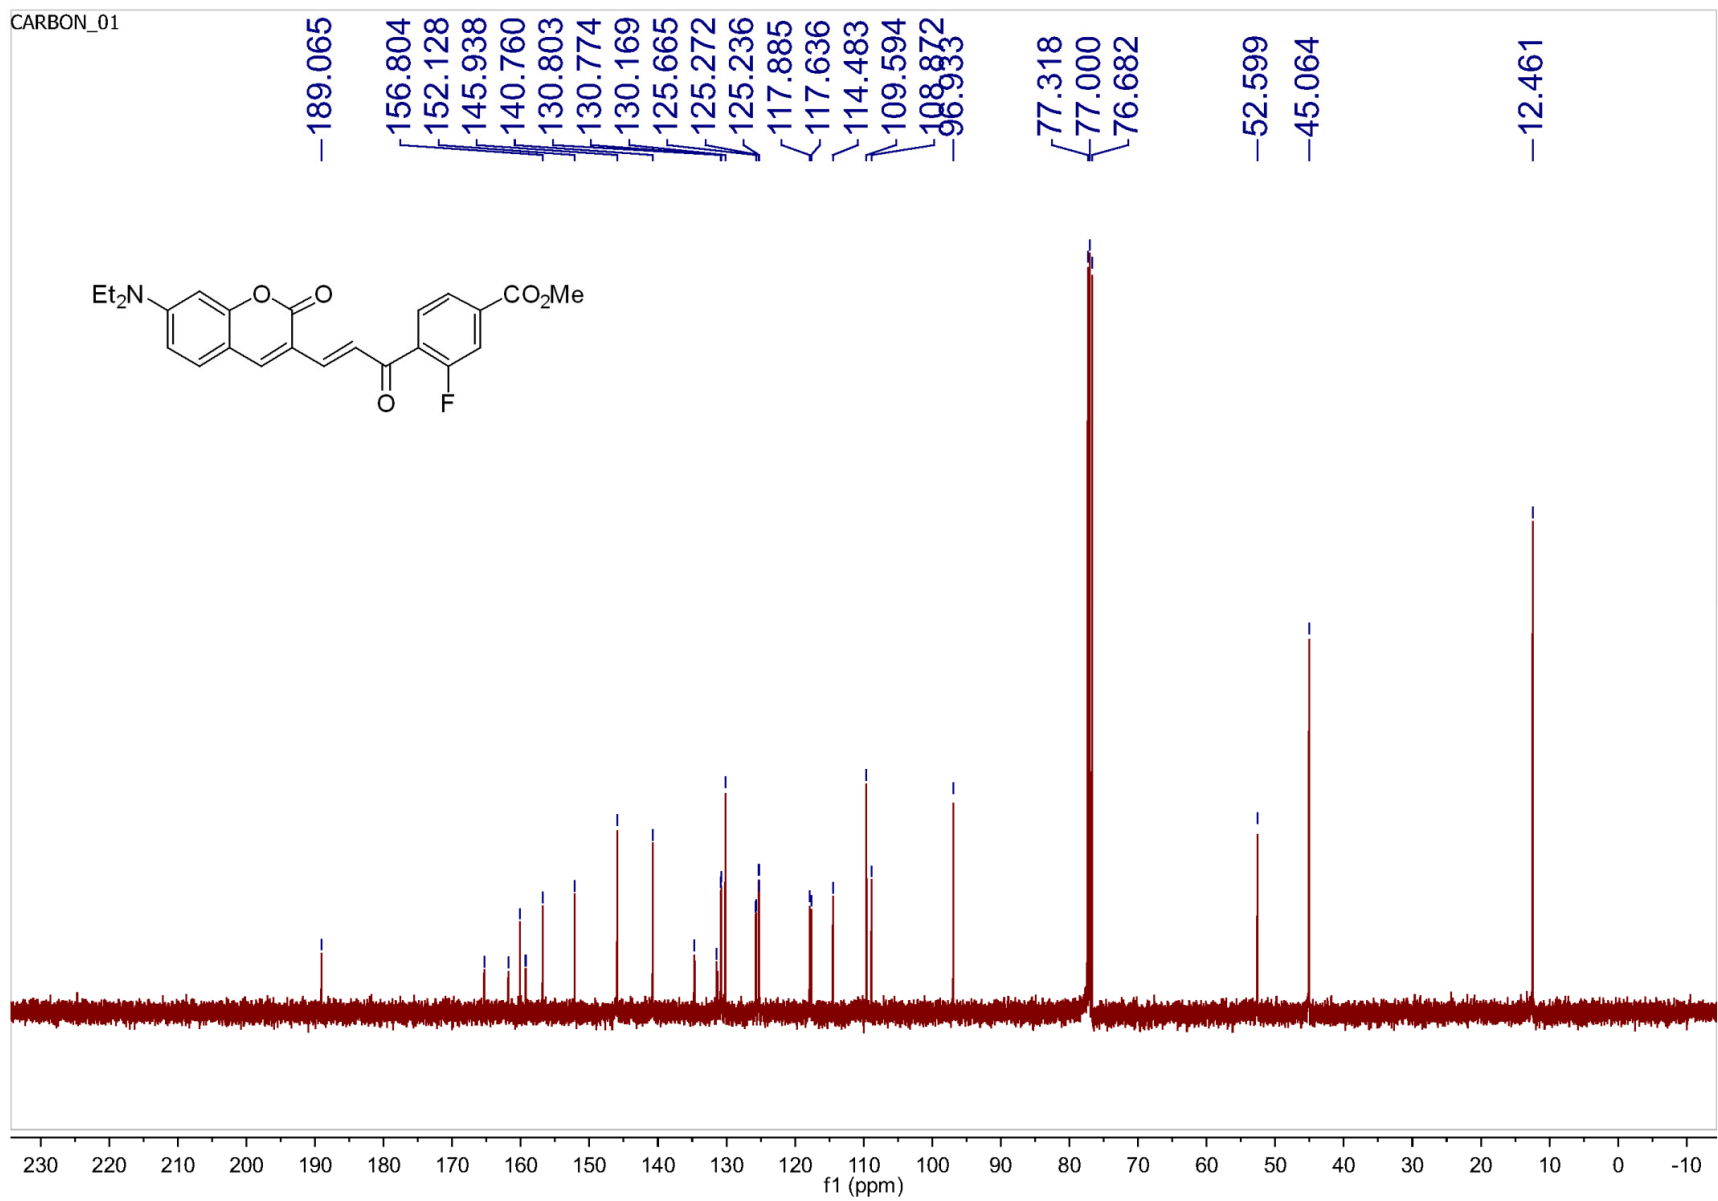

Figure S7.  $^{13}\text{C}$  NMR (100 MHz,  $\text{CDCl}_3$ ) spectrum of 1-F-ester

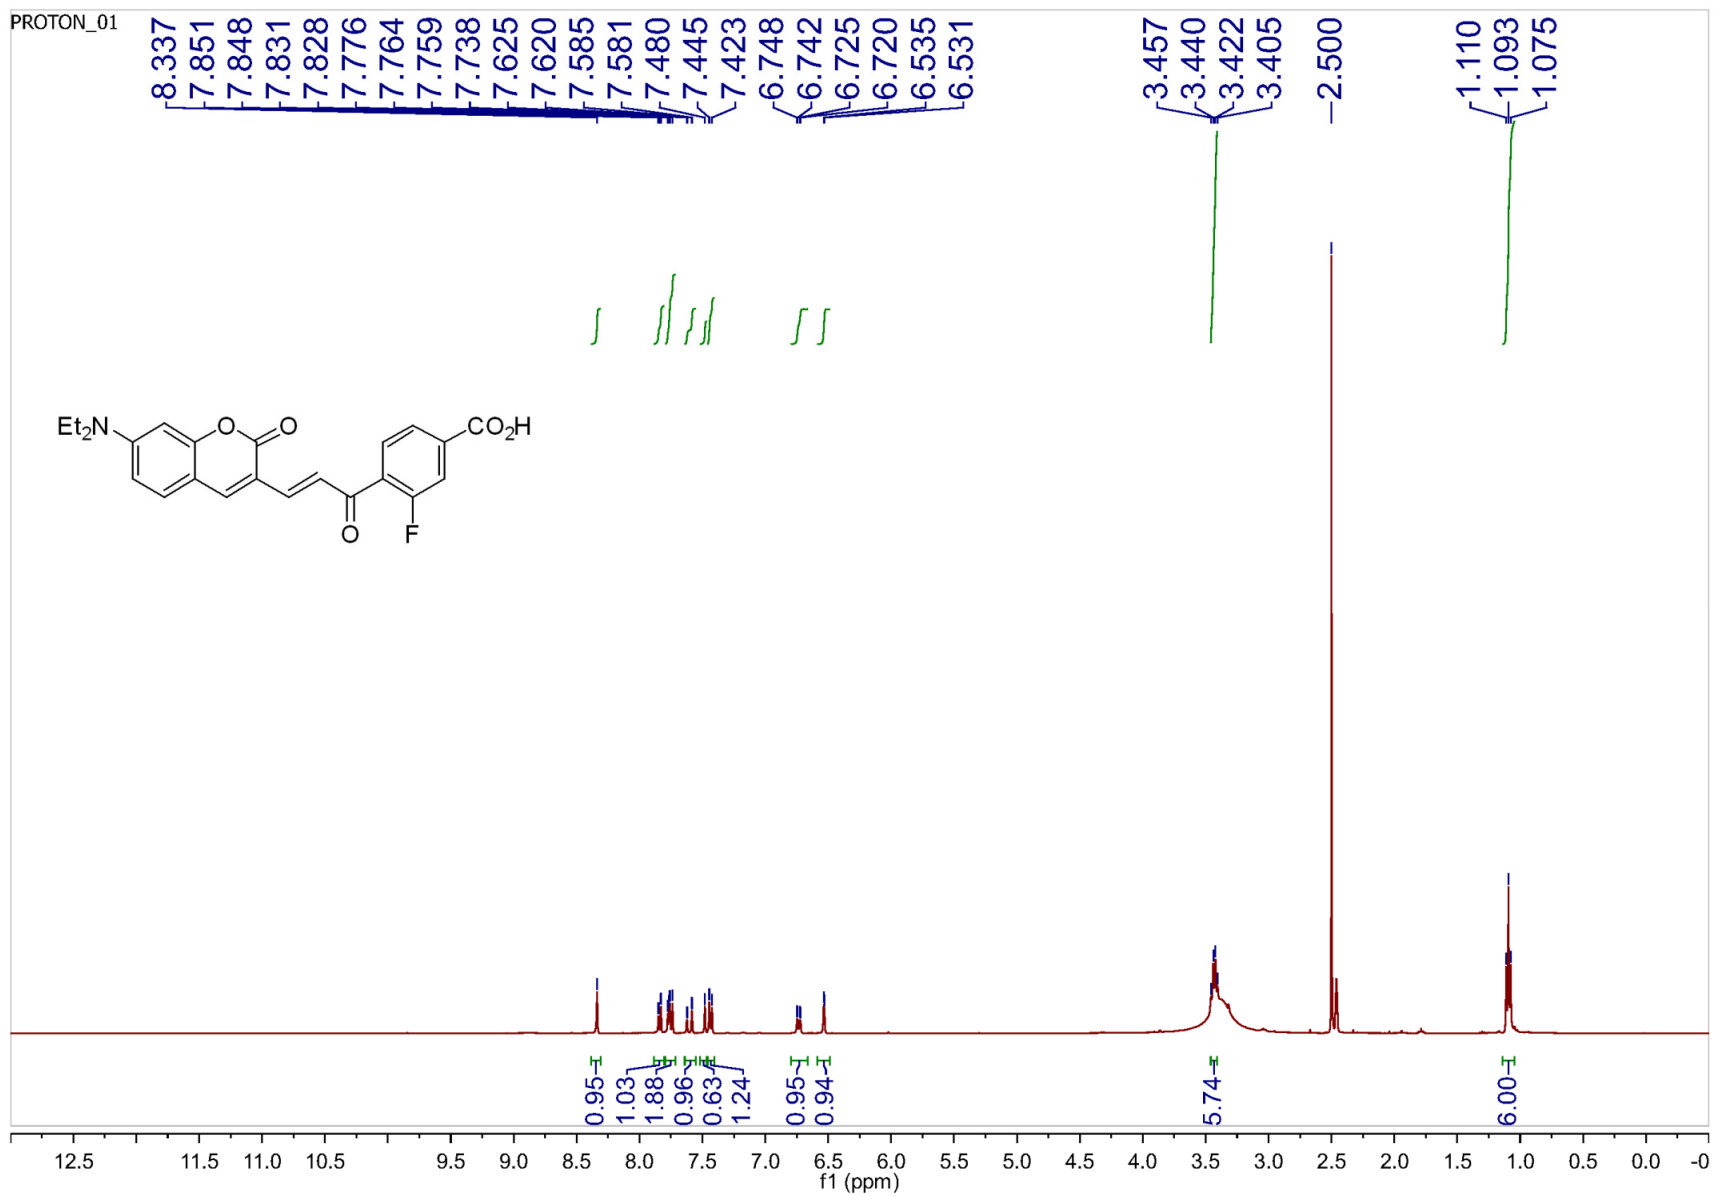

Figure S8.  $^1\text{H}$  NMR (400 MHz,  $\text{DMSO-}d_6$ ) spectrum of 1-F

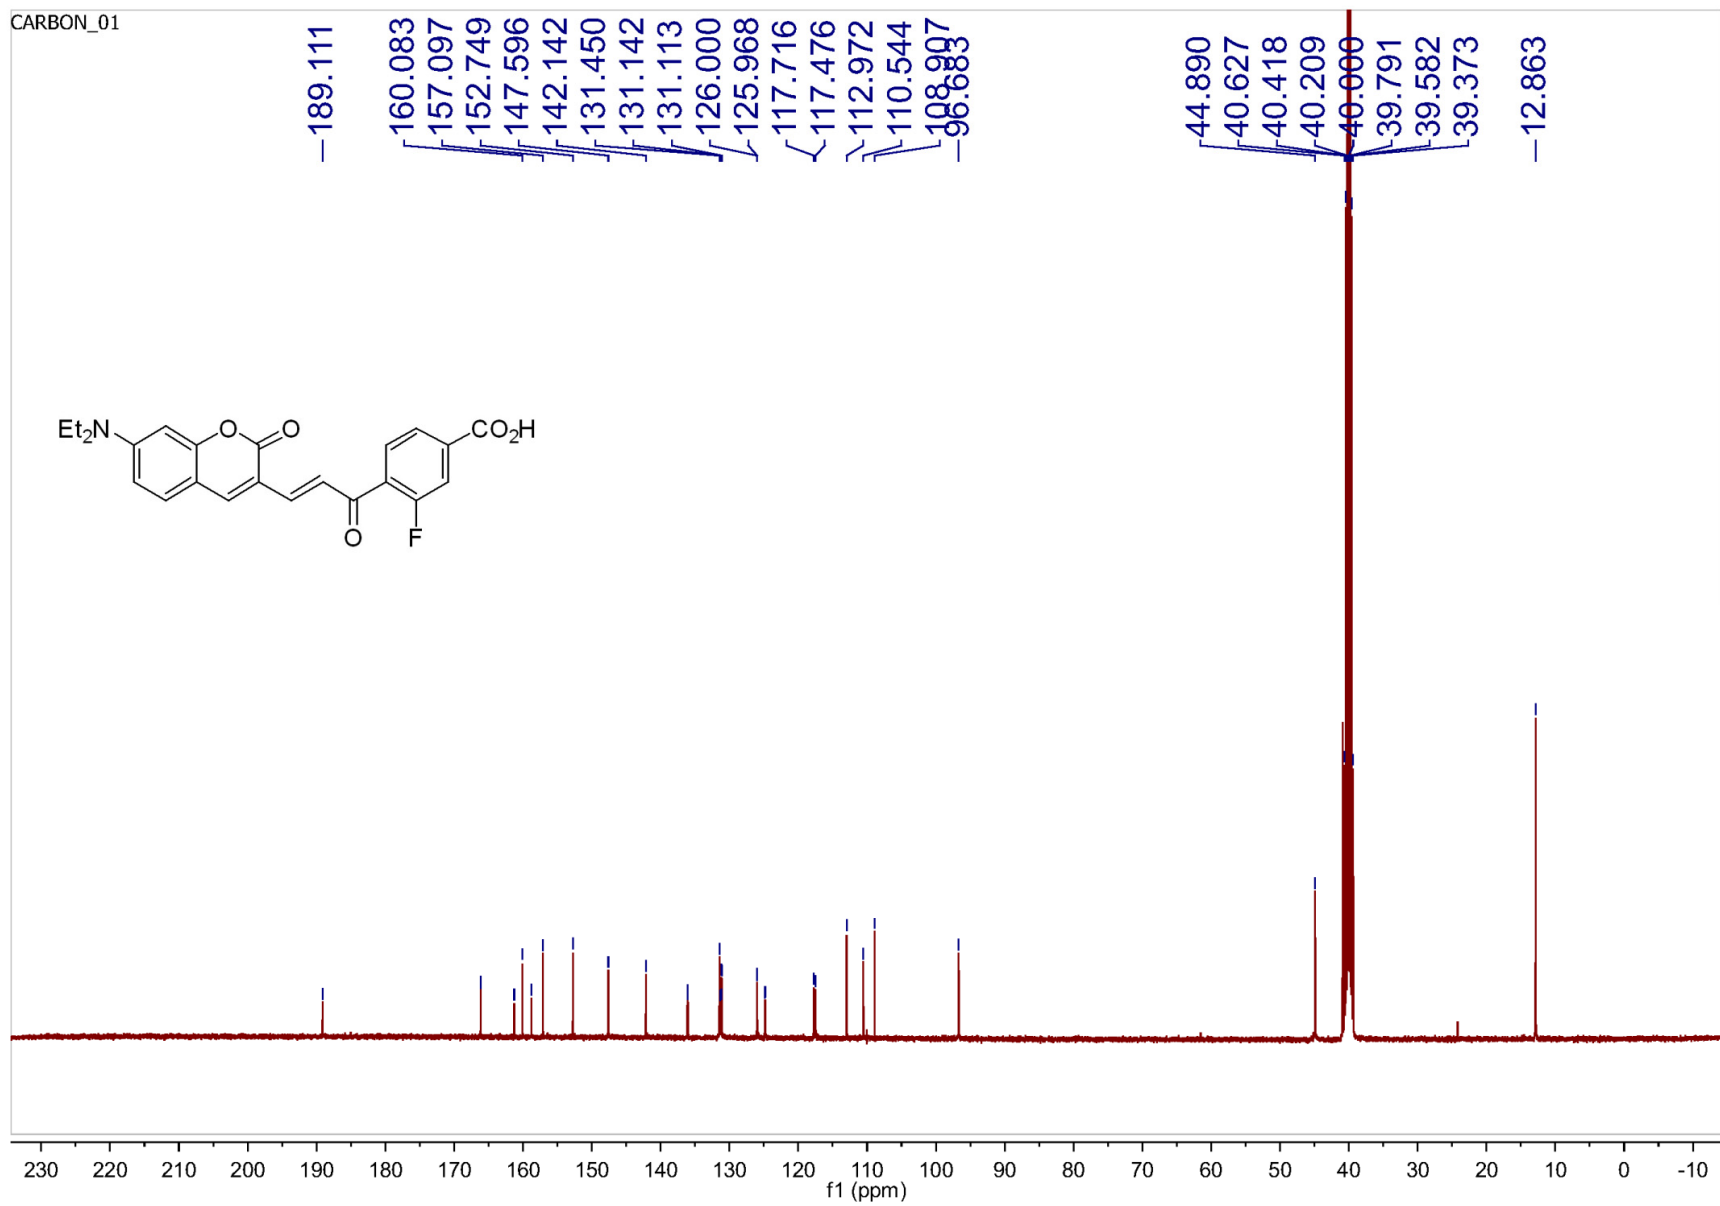

Figure S9.  $^{13}\text{C}$  NMR (100 MHz,  $\text{DMSO-}d_6$ ) spectrum of 1-F

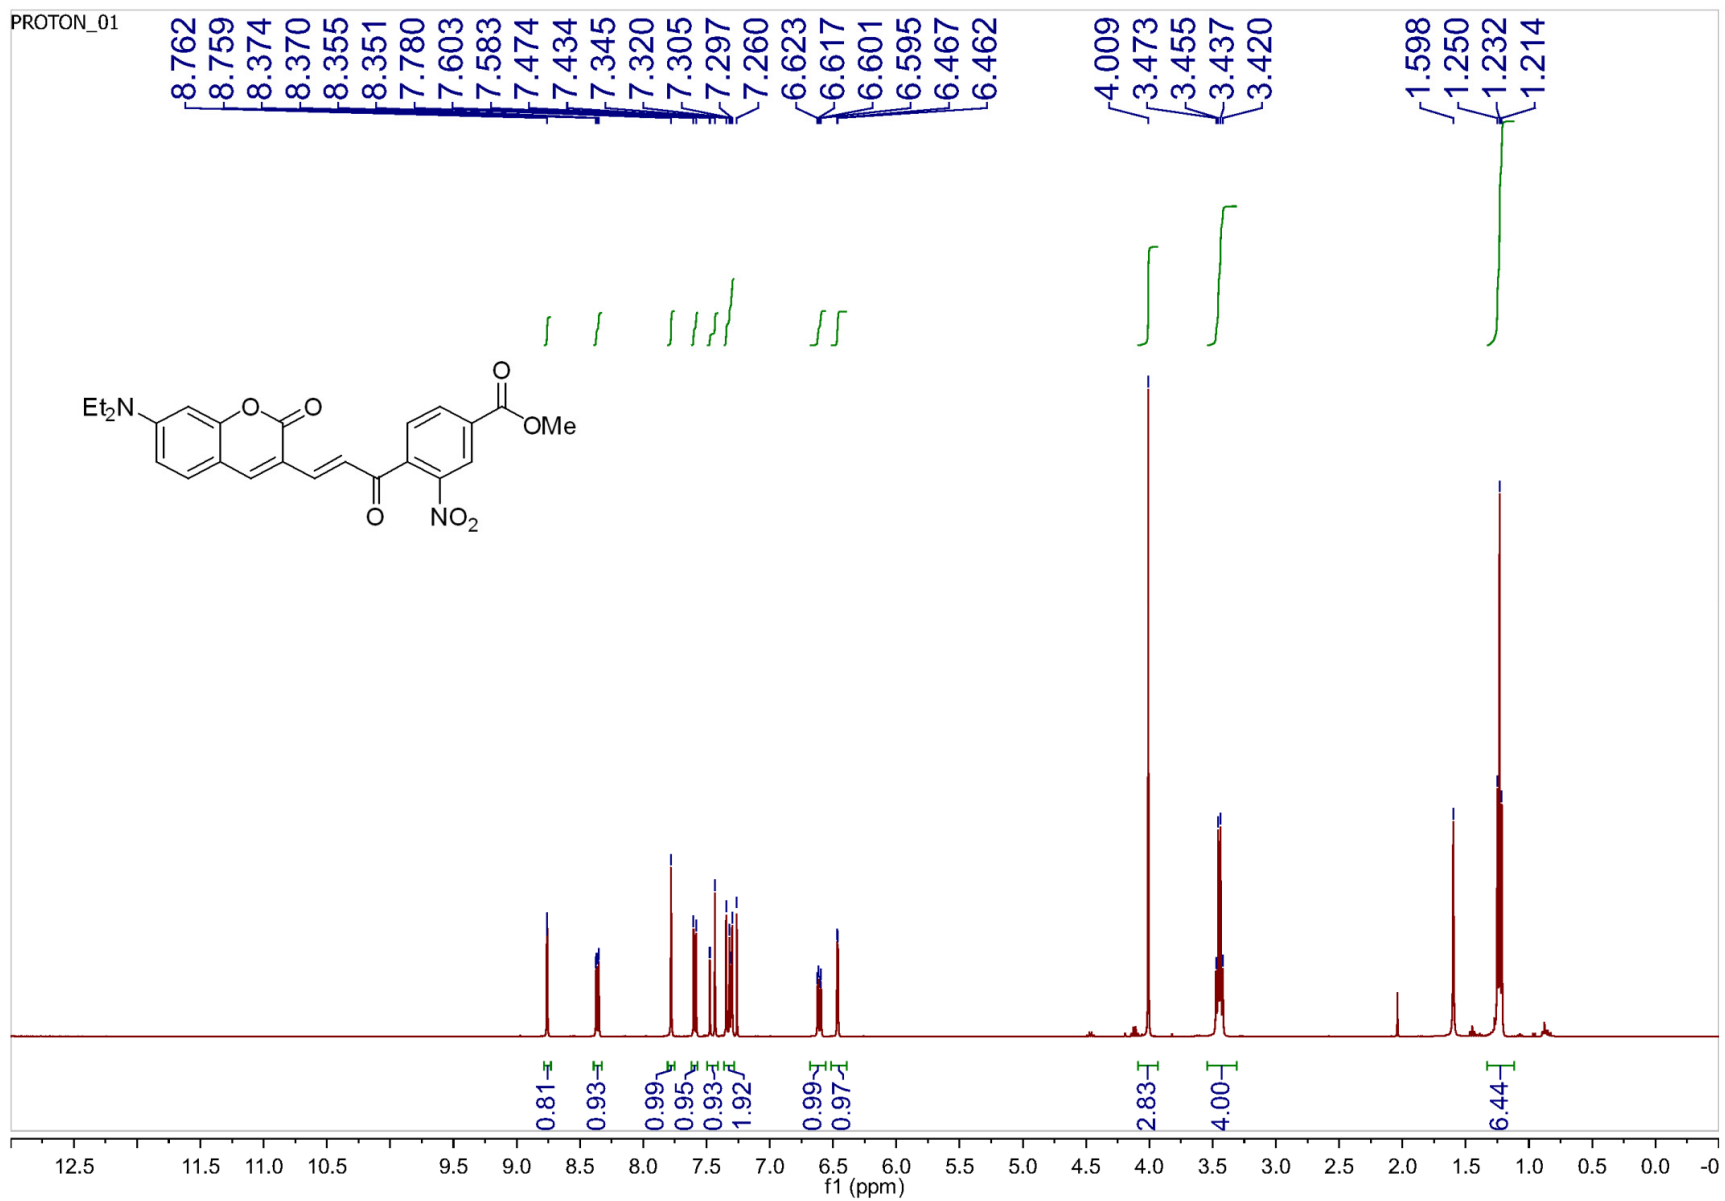

Figure S10. <sup>1</sup>H NMR (400 MHz, CDCl<sub>3</sub>) spectrum of 1-NO<sub>2</sub>-ester

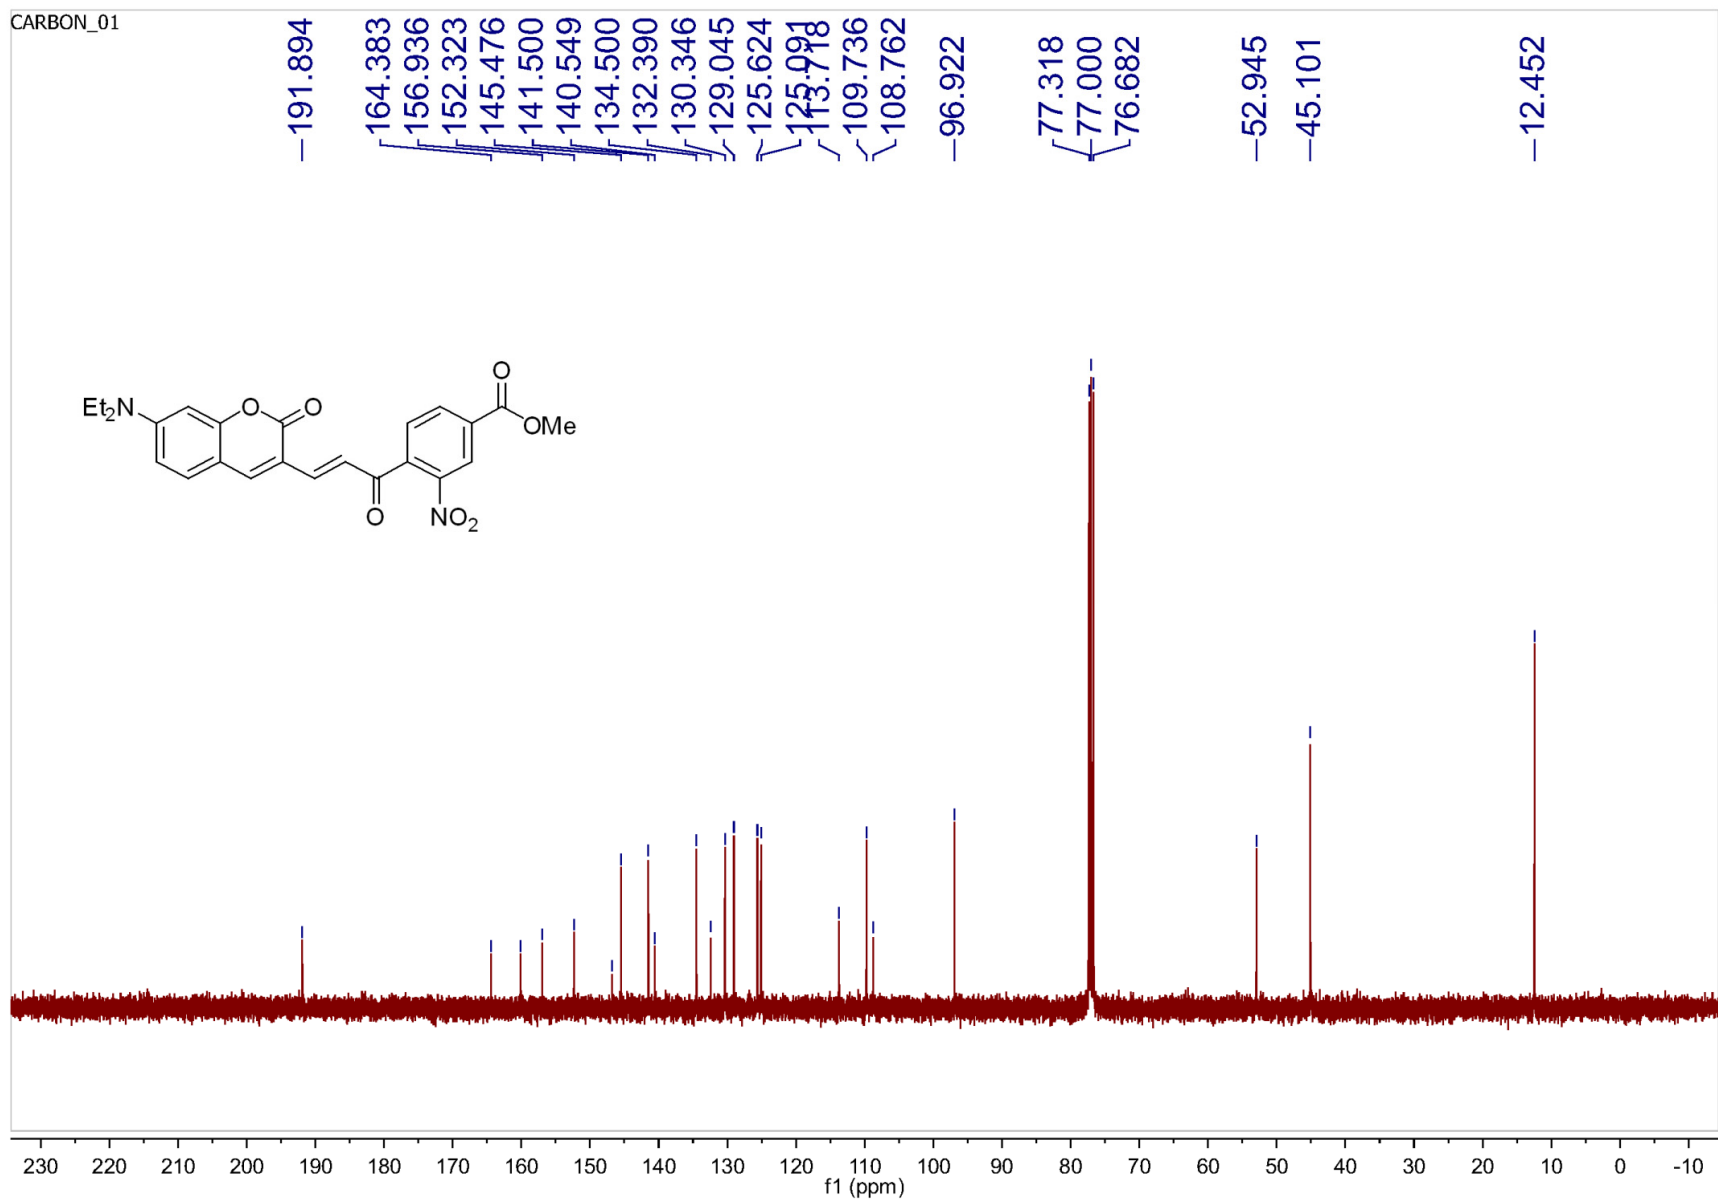

**Figure S11.**  $^{13}\text{C}$  NMR (100 MHz,  $\text{CDCl}_3$ ) spectrum of 1- $\text{NO}_2$ -ester

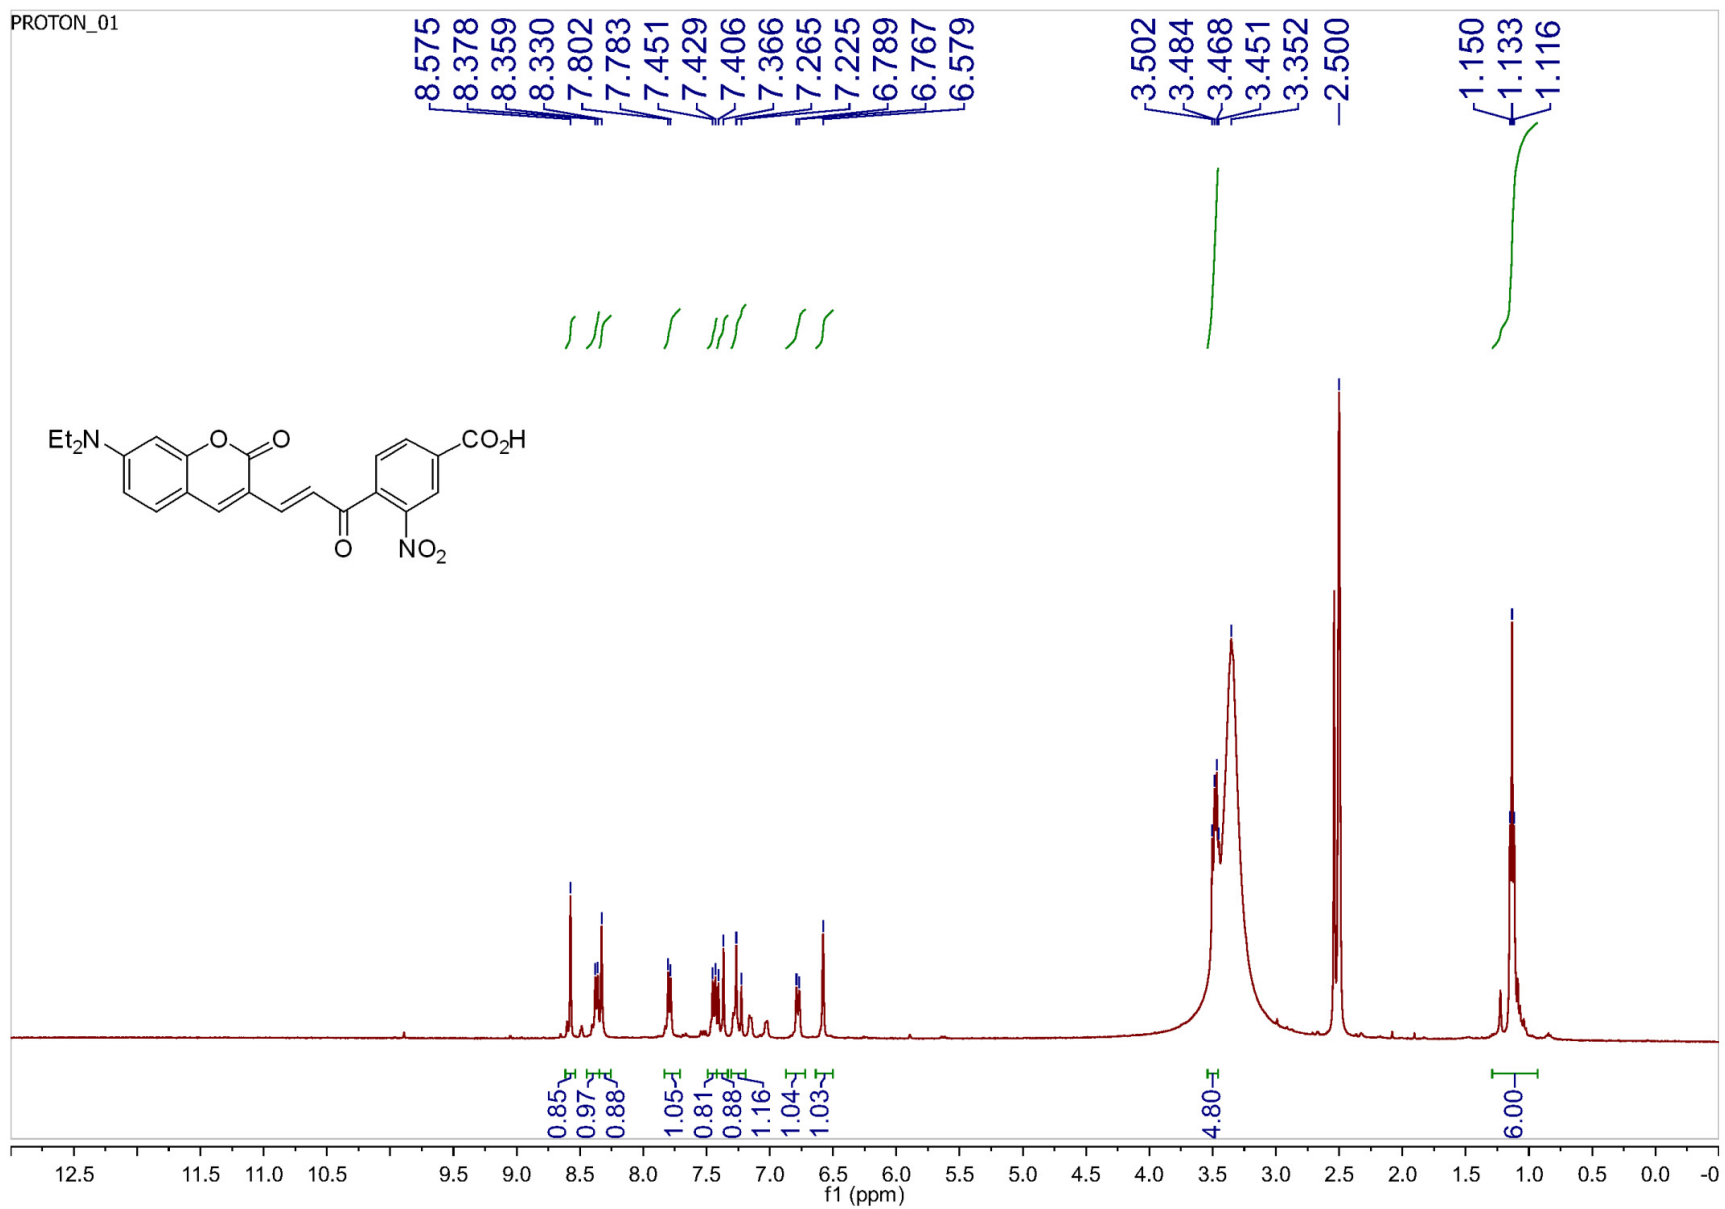

**Figure S12.** <sup>1</sup>H NMR (400 MHz, DMSO-*d*<sub>6</sub>) spectrum of 1-NO<sub>2</sub>

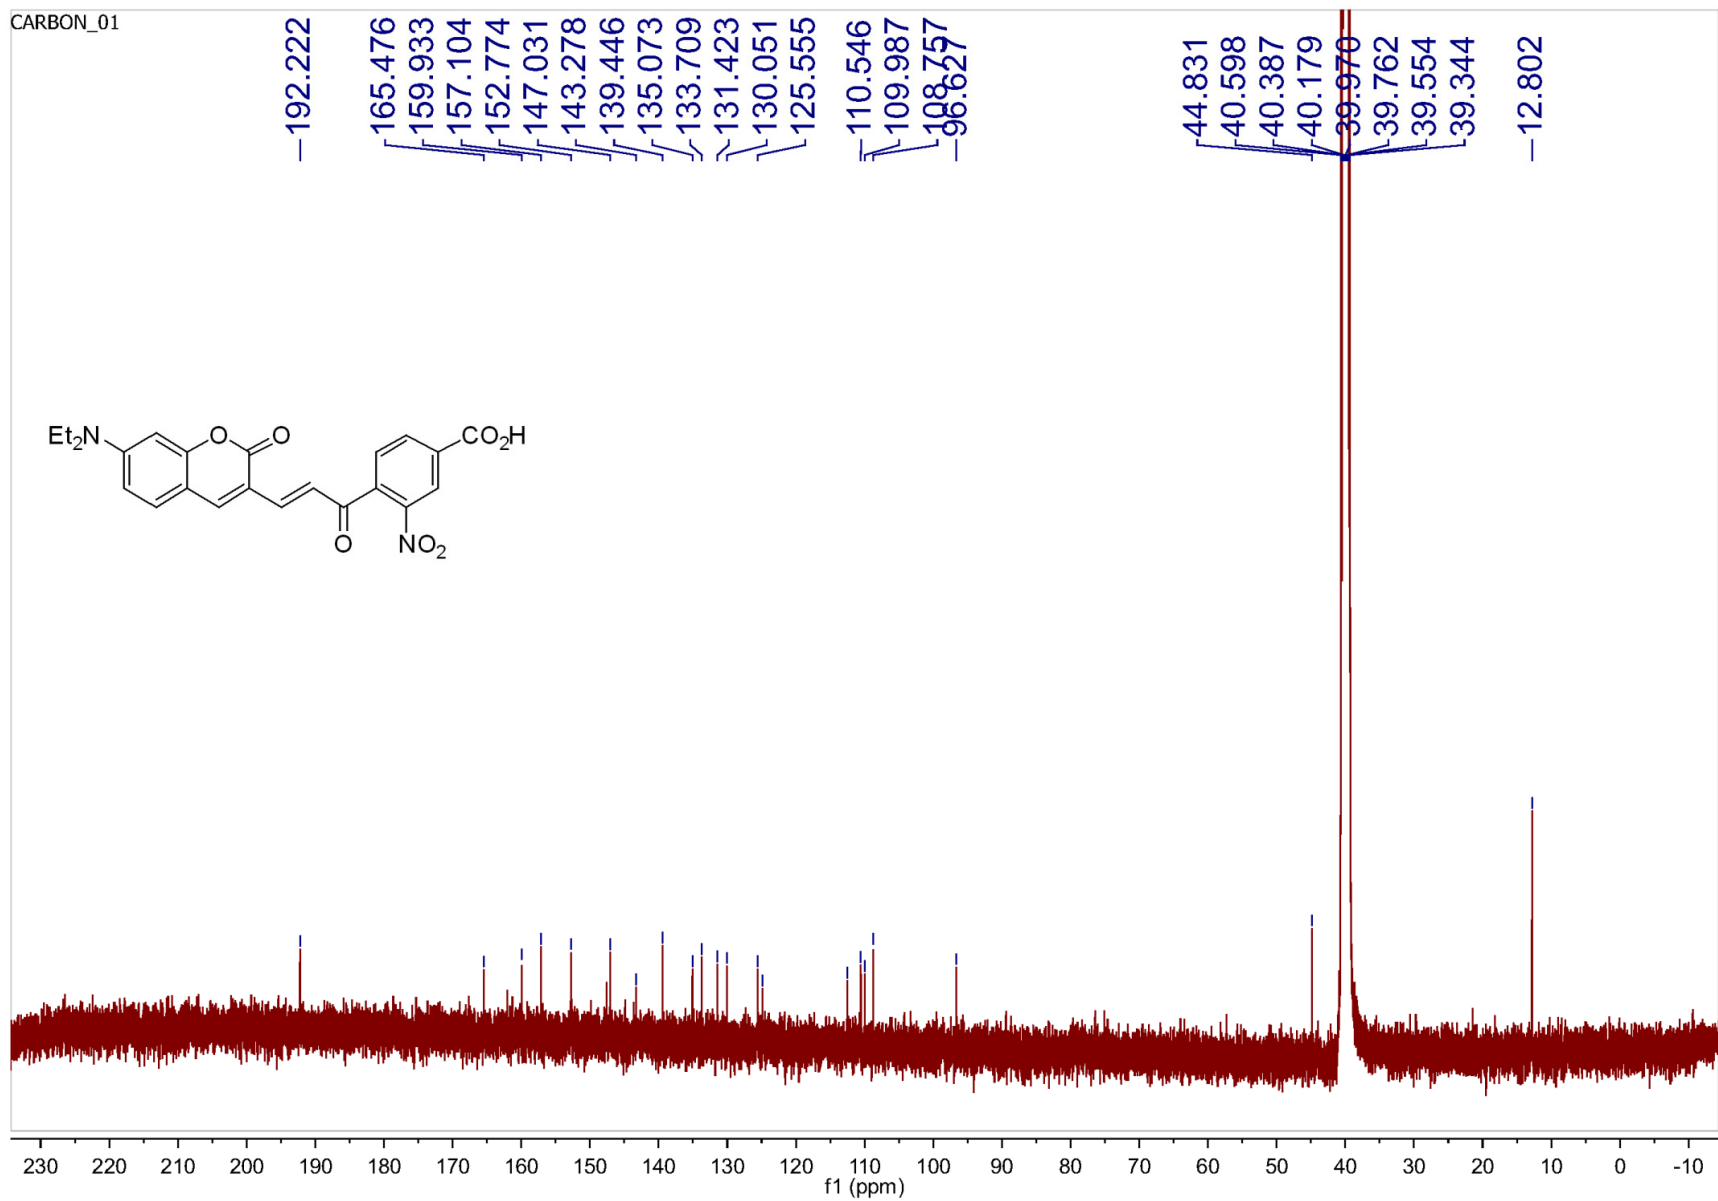

**Figure S13.**  $^{13}\text{C}$  NMR (100 MHz,  $\text{DMSO-}d_6$ ) spectrum of 1- $\text{NO}_2$

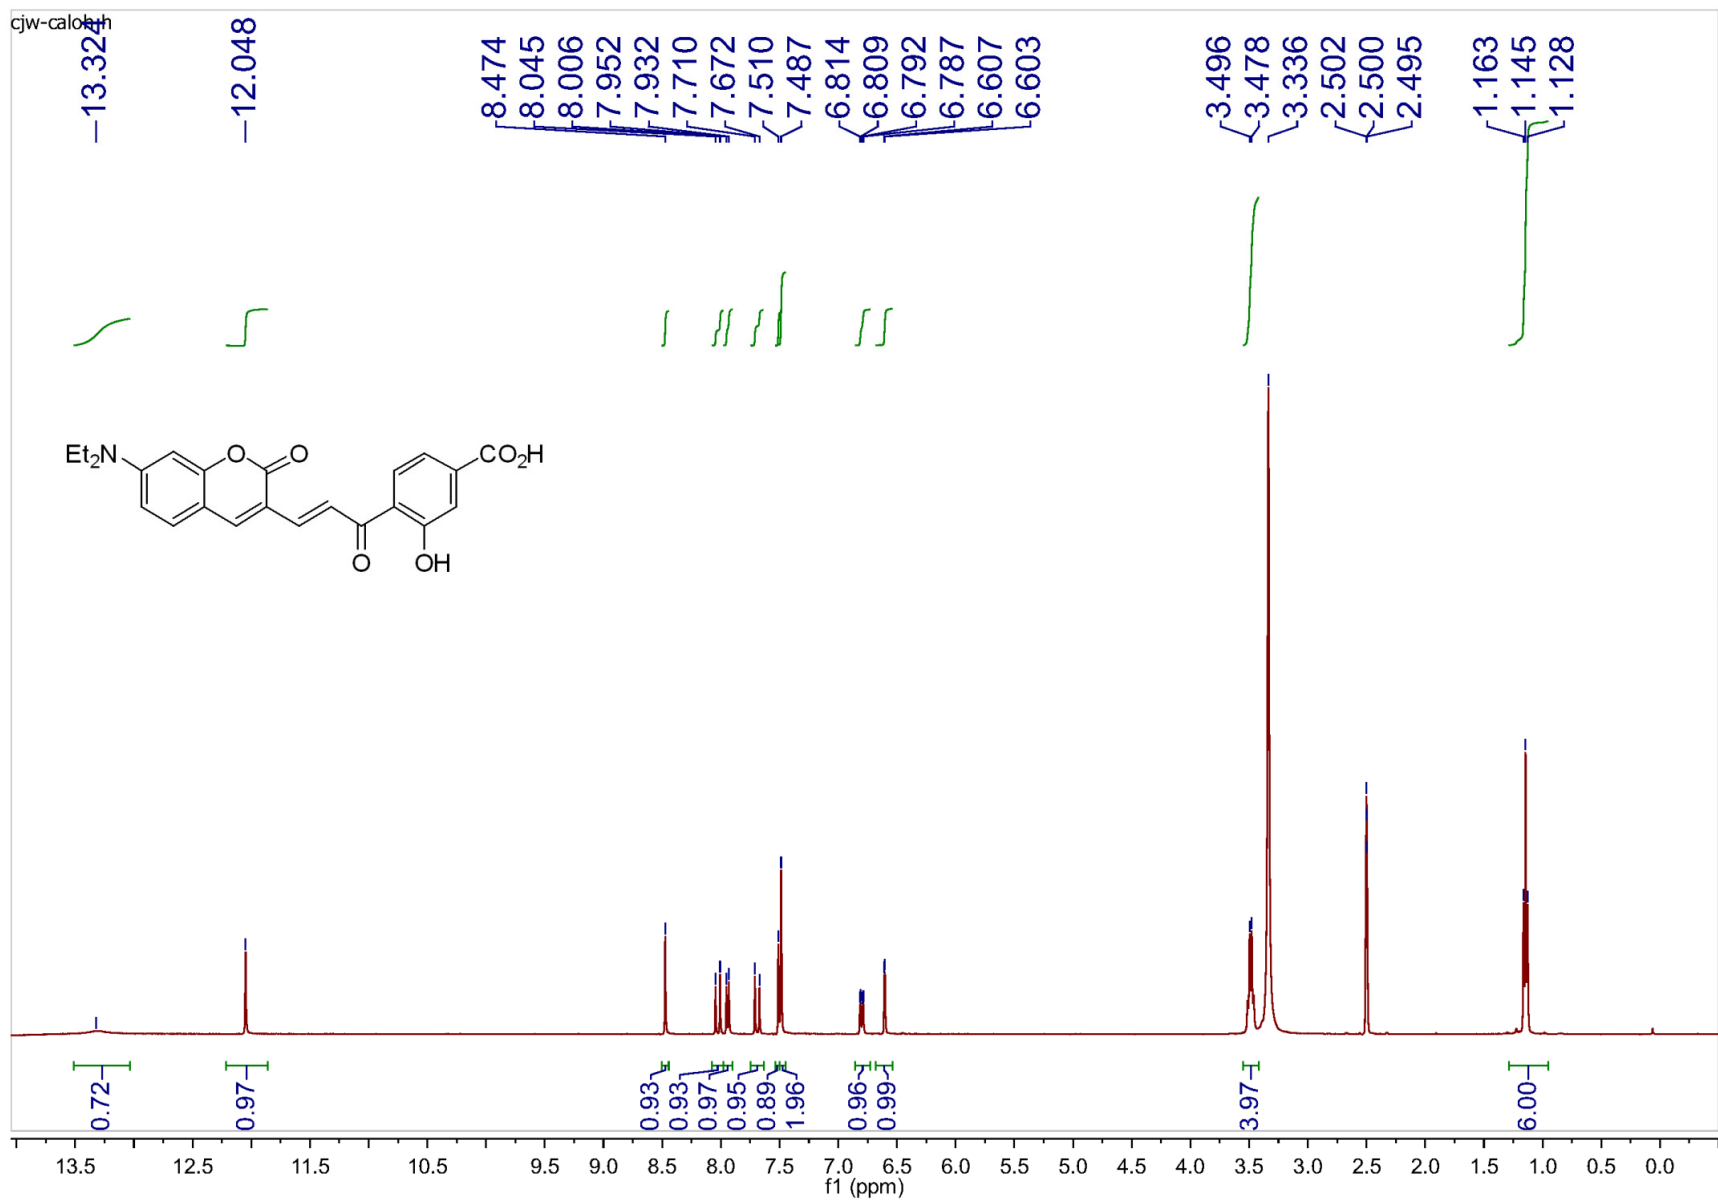

**Figure S14.** <sup>1</sup>H NMR (400 MHz, DMSO-*d*<sub>6</sub>) spectrum of 1-OH



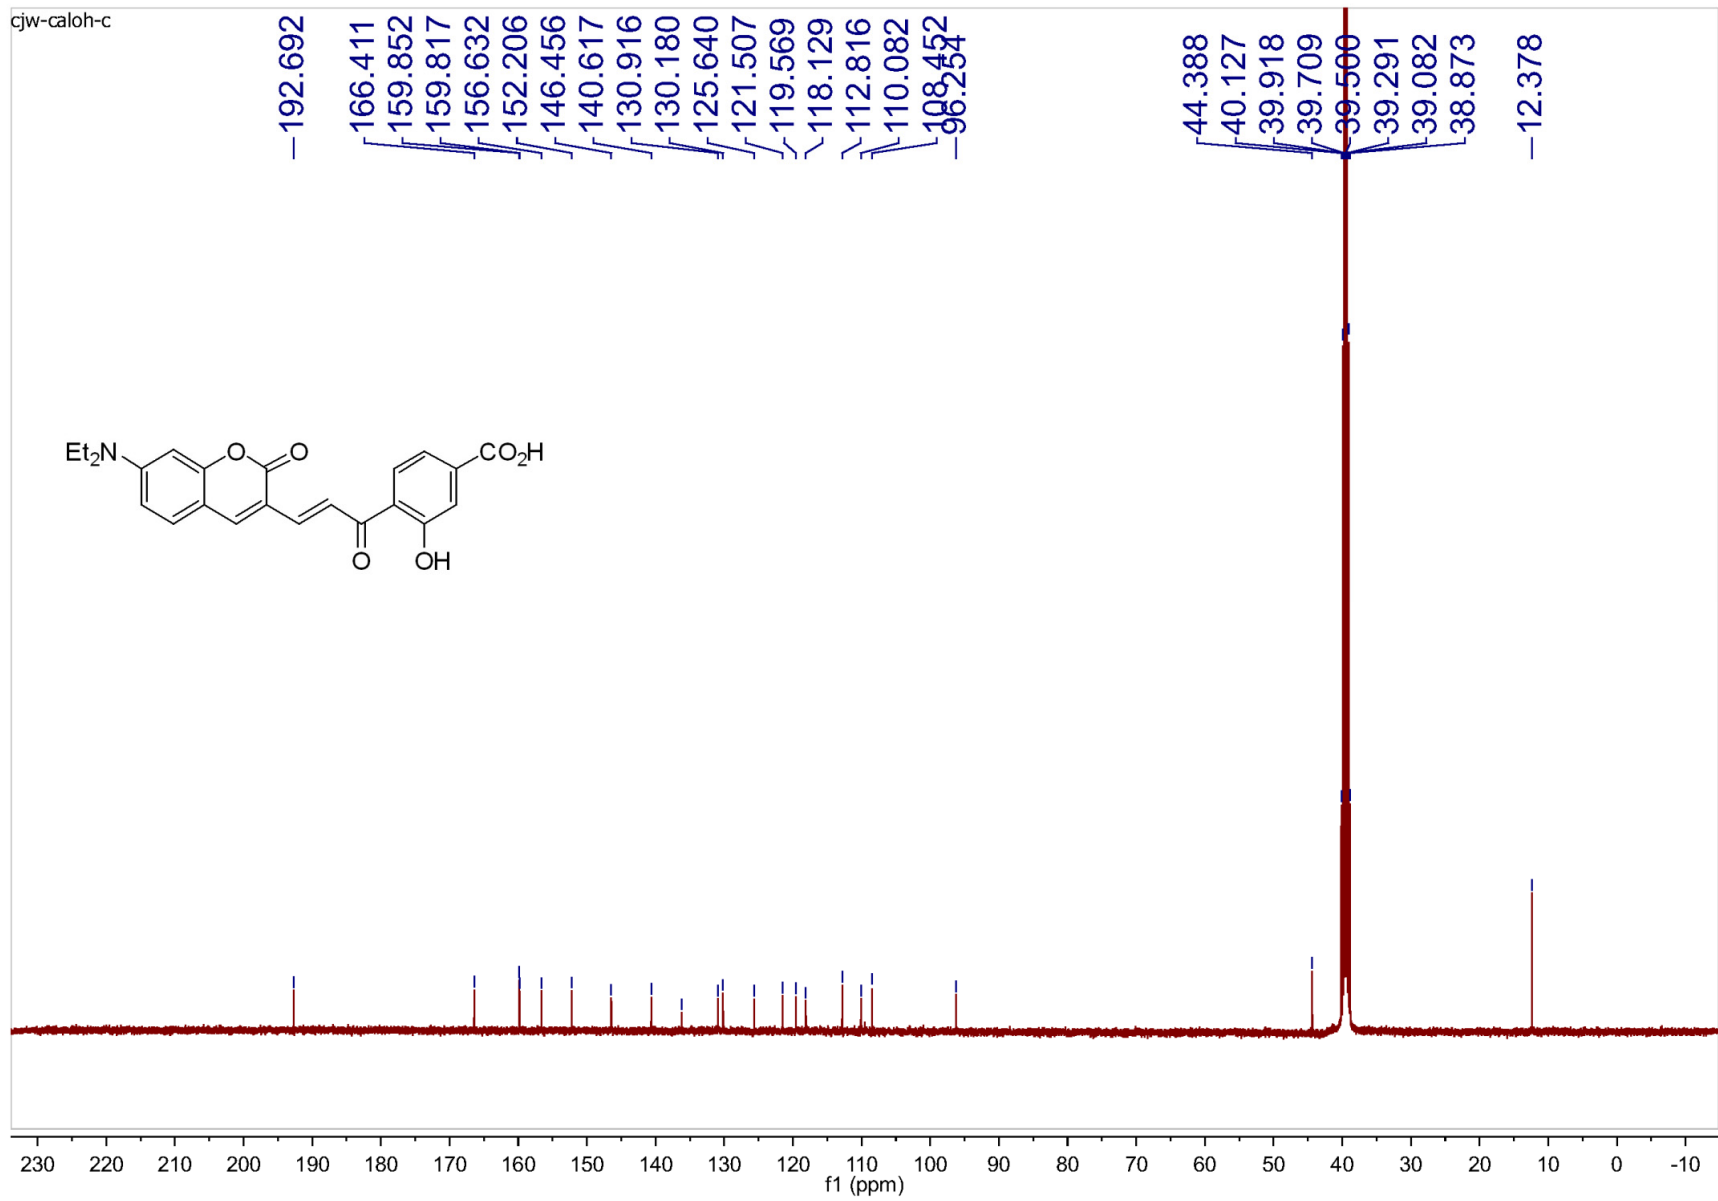

**Figure S15.**  $^{13}\text{C}$  NMR (100 MHz,  $\text{DMSO-}d_6$ ) spectrum of 1-OH

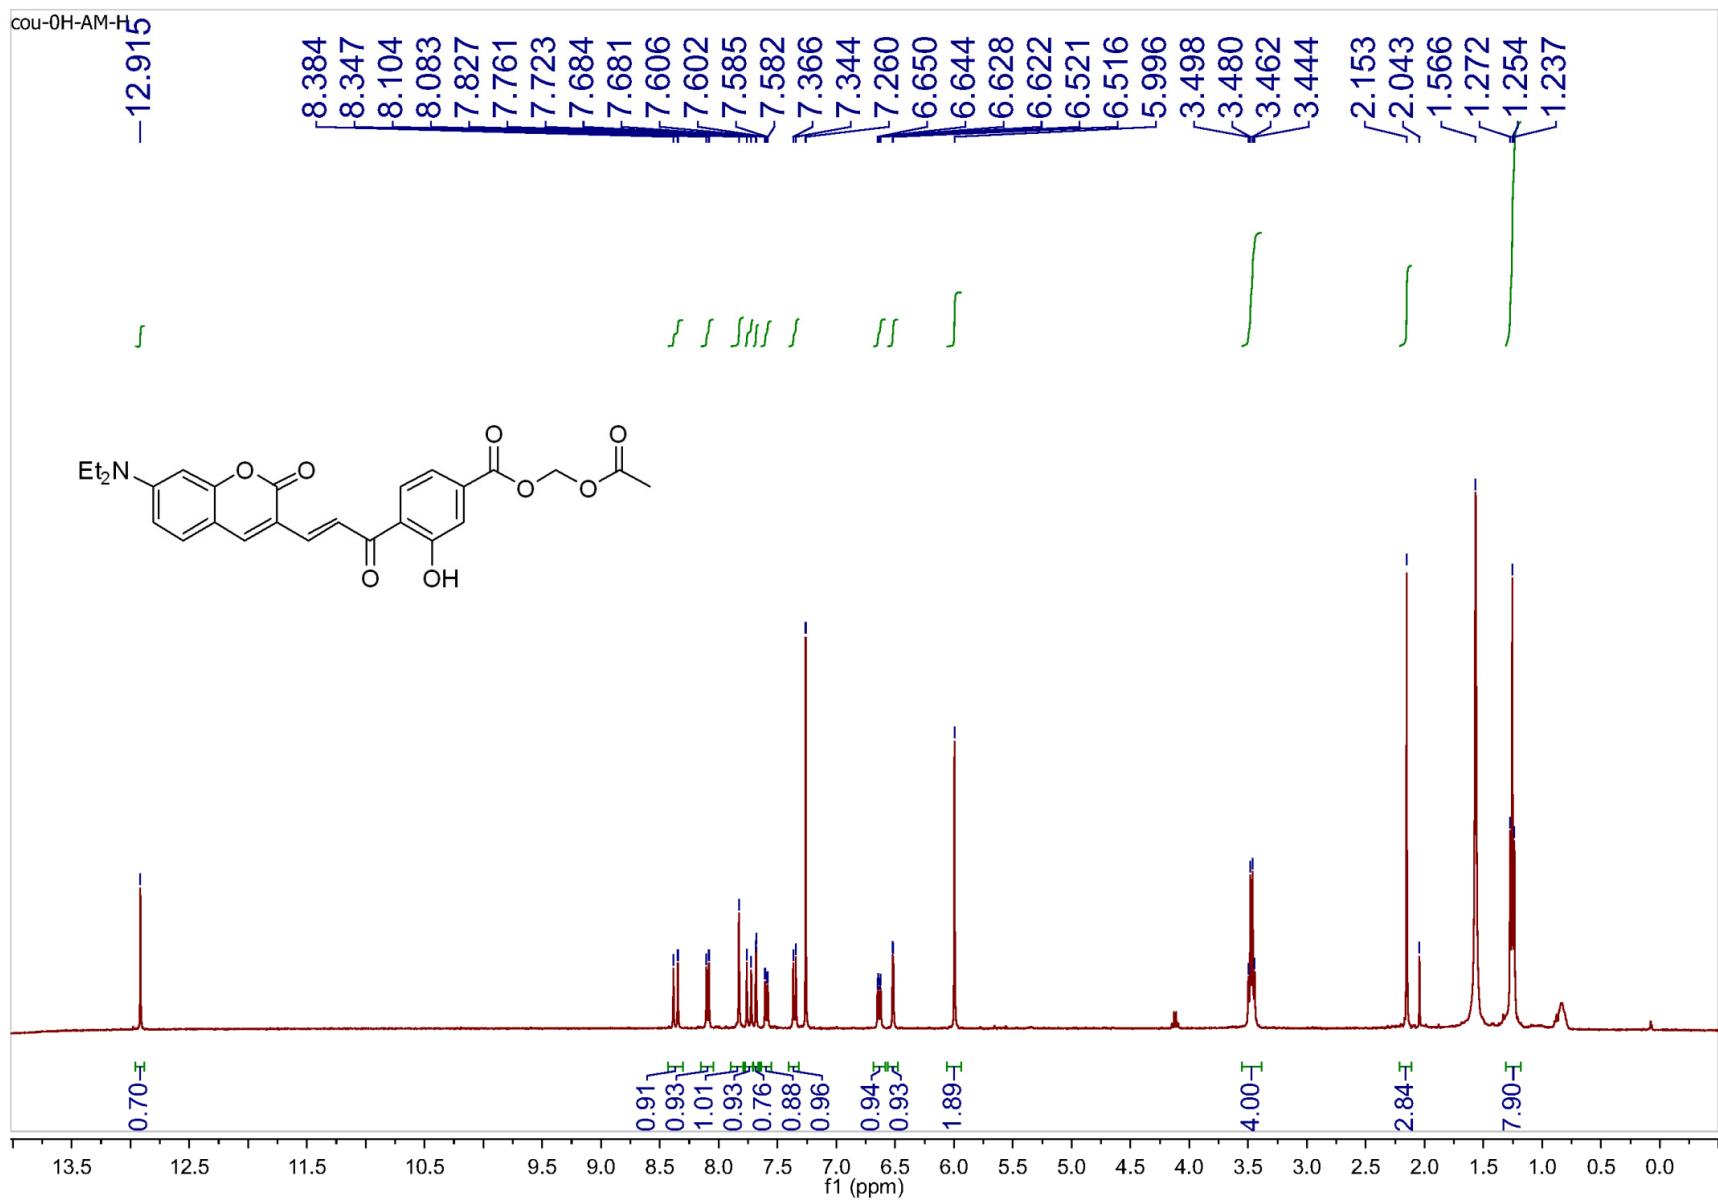

**Figure S16.**  $^1\text{H}$  NMR (400 MHz,  $\text{CDCl}_3$ ) spectrum of 1-OH-AM

cjw-couoh-am-c0923

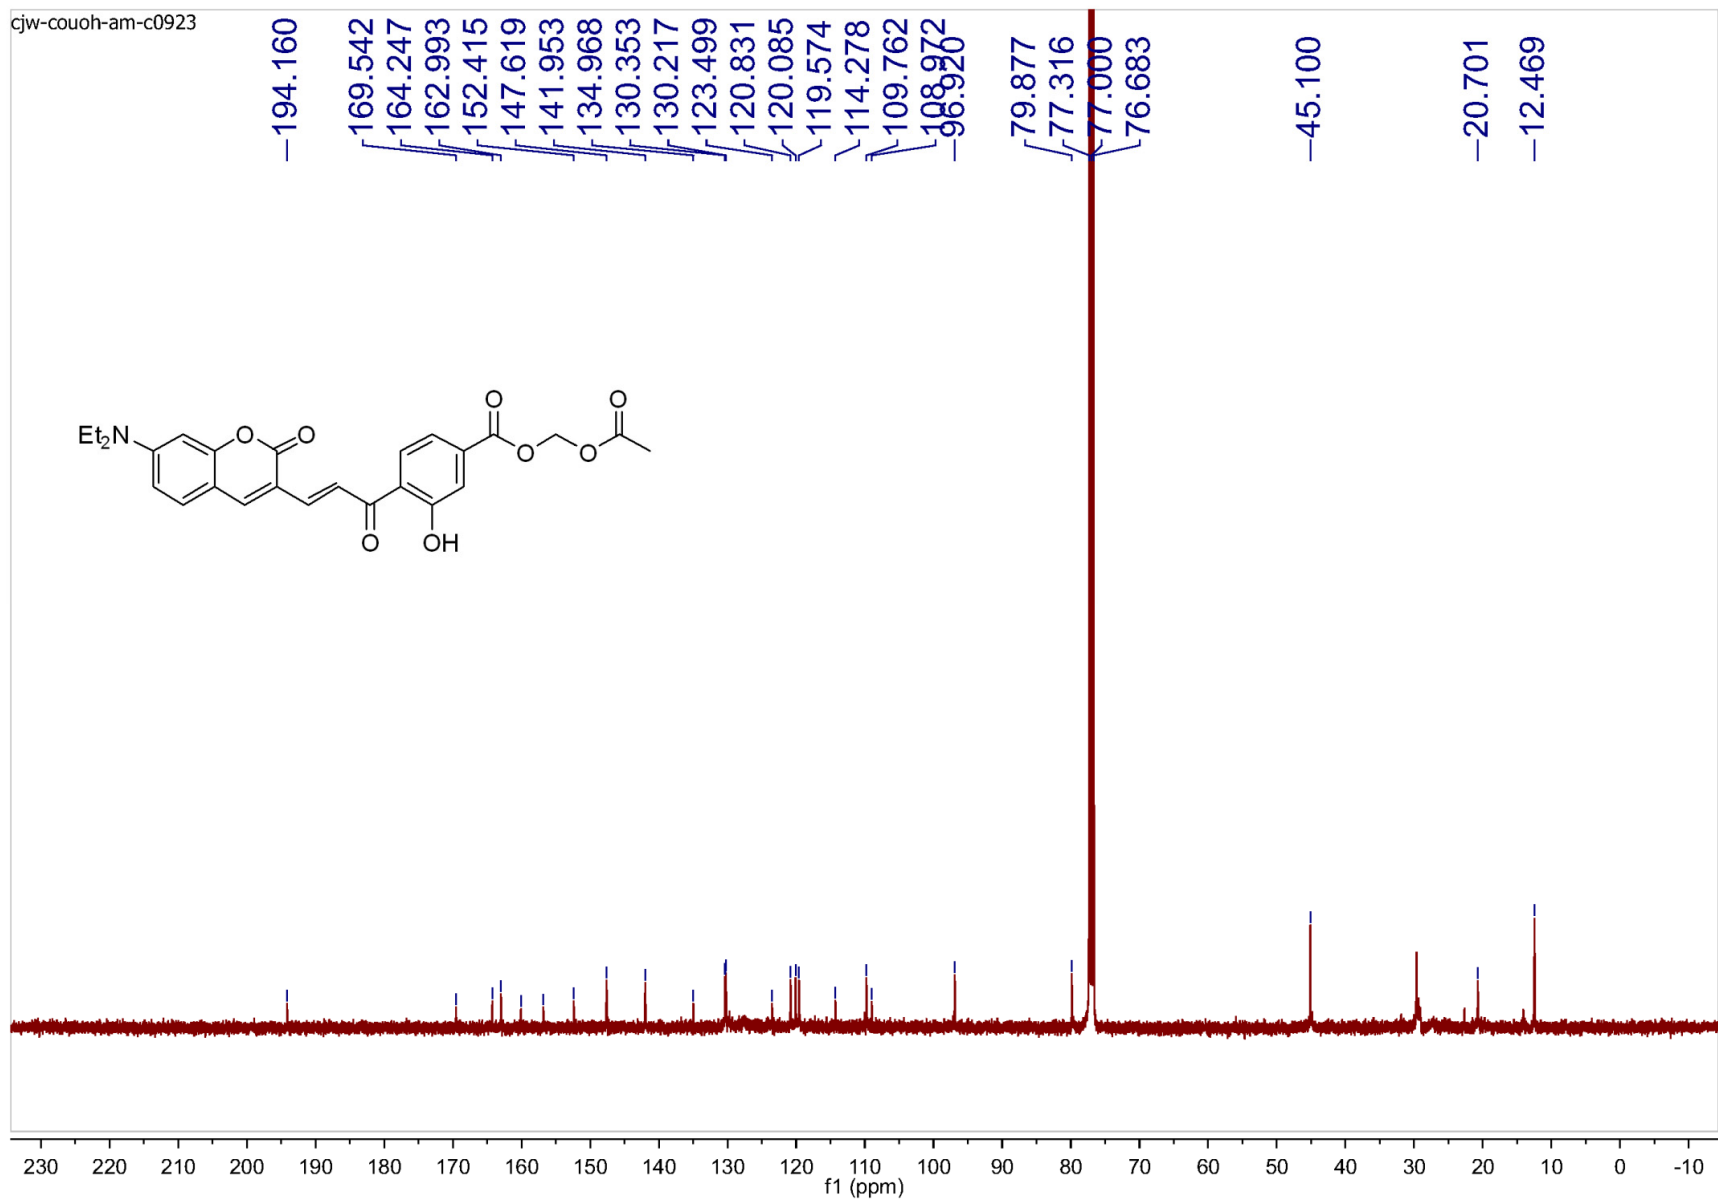

**Figure S17.** <sup>13</sup>C NMR (100 MHz, DMSO-*d*<sub>6</sub> CDCl<sub>3</sub>) spectrum of 1-OH-AM

## Computational Methodology and Data

All DFT calculations were performed using the Gaussian 09 Version D.01 suite of programs<sup>S5</sup>. The geometries listed below were optimized at the M06-2X/6-31G(d) level of theory in the gas phase or with the SMD solvation method in water. Frequency analyses revealed no virtual frequencies in all the optimized structures. Thermochemical corrections were obtained from frequency calculations at the same level of theory without scaling. Single-point energies were computed using M06-2X, B3LYP, PBE1PBE and wB97XD DFT theories with a 6-311G(2d,p) basis set at the M06-2X/6-31G(d) geometries, and were used in conjunction with the M06-2X/6-31G(d) thermochemical corrections to obtain the free energies in water.

The geometries listed below were optimized at the M06-2X/6-31G(d) level of theory in the gas phase.

### MeSH

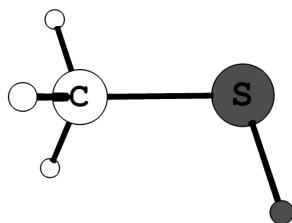

|    |             |              |              |
|----|-------------|--------------|--------------|
| 6  | 1.013174000 | -0.096917000 | -0.052025000 |
| 16 | 2.832526000 | -0.062876000 | 0.040551000  |
| 1  | 0.644727000 | -1.096548000 | -0.287565000 |
| 1  | 0.636195000 | 0.623828000  | -0.779203000 |
| 1  | 0.648707000 | 0.183712000  | 0.937703000  |
| 1  | 3.059402000 | -0.452167000 | -1.223776000 |

### Frequencies

|           |           |           |           |           |           |
|-----------|-----------|-----------|-----------|-----------|-----------|
| 325.9179  | 740.3729  | 818.4946  | 992.0486  | 1122.0626 | 1398.4898 |
| 1500.2169 | 1515.1432 | 2737.7458 | 3099.8752 | 3189.9767 | 3193.8322 |

|                                              |                             |
|----------------------------------------------|-----------------------------|
| E(RM062X)=                                   | -438.629275                 |
| Zero-point correction=                       | 0.047008 (Hartree/Particle) |
| Thermal correction to Energy=                | 0.050478                    |
| Thermal correction to Enthalpy=              | 0.051422                    |
| Thermal correction to Gibbs Free Energy=     | 0.022926                    |
| Sum of electronic and zero-point Energies=   | -438.582267                 |
| Sum of electronic and thermal Energies=      | -438.578797                 |
| Sum of electronic and thermal Enthalpies=    | -438.577853                 |
| Sum of electronic and thermal Free Energies= | -438.606349                 |

**MeS<sup>-</sup>**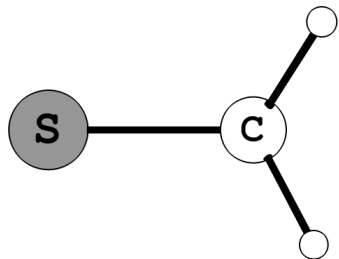

|    |             |              |              |
|----|-------------|--------------|--------------|
| 6  | 1.099140000 | 0.064404000  | -0.050063000 |
| 16 | 2.937606000 | 0.064293000  | -0.050223000 |
| 1  | 0.688942000 | 0.869278000  | -0.677021000 |
| 1  | 0.688834000 | 0.204766000  | 0.960280000  |
| 1  | 0.689141000 | -0.880942000 | -0.433612000 |

## Frequencies

726.6347    939.863    942.933    1358.6706    1507.2842    1510.9497

|                                              |                             |
|----------------------------------------------|-----------------------------|
| E(RM062X)=                                   | -438.060636                 |
| Zero-point correction=                       | 0.036655 (Hartree/Particle) |
| Thermal correction to Energy=                | 0.0397                      |
| Thermal correction to Enthalpy=              | 0.040644                    |
| Thermal correction to Gibbs Free Energy=     | 0.013051                    |
| Sum of electronic and zero-point Energies=   | -438.023981                 |
| Sum of electronic and thermal Energies=      | -438.020936                 |
| Sum of electronic and thermal Enthalpies=    | -438.019992                 |
| Sum of electronic and thermal Free Energies= | -438.047585                 |

**H<sub>2</sub>O**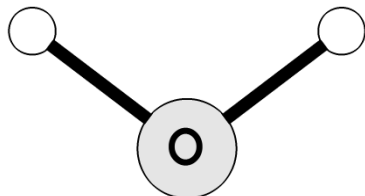

|   |              |              |             |
|---|--------------|--------------|-------------|
| 8 | 0.000029000  | 0.108787000  | 0.000000000 |
| 1 | 0.770470000  | -0.473598000 | 0.000000000 |
| 1 | -0.770499000 | -0.473488000 | 0.000000000 |

## Frequencies

1665.13    3817.66    3941.03

|                                              |                             |
|----------------------------------------------|-----------------------------|
| E(RM062X)=                                   | -76.3837478                 |
| Zero-point correction=                       | 0.021469 (Hartree/Particle) |
| Thermal correction to Energy=                | 0.024304                    |
| Thermal correction to Enthalpy=              | 0.025248                    |
| Thermal correction to Gibbs Free Energy=     | 0.003164                    |
| Sum of electronic and zero-point Energies=   | -76.3622788                 |
| Sum of electronic and thermal Energies=      | -76.3594438                 |
| Sum of electronic and thermal Enthalpies=    | -76.3584998                 |
| Sum of electronic and thermal Free Energies= | -76.3805838                 |

H<sub>3</sub>O<sup>+</sup>

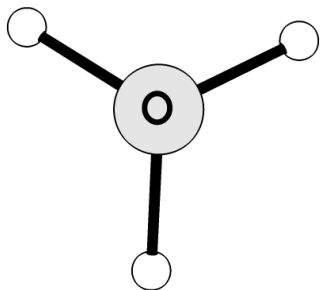

|   |             |              |              |
|---|-------------|--------------|--------------|
| 8 | 1.088100000 | 0.014662000  | 0.069461000  |
| 1 | 0.735877000 | 0.269670000  | 0.955671000  |
| 1 | 0.735930000 | 0.588161000  | -0.652738000 |
| 1 | 2.073861000 | -0.035329000 | 0.059504000  |

Frequencies

|          |           |          |           |          |           |
|----------|-----------|----------|-----------|----------|-----------|
| 907.5629 | 1714.1075 | 1715.743 | 3542.0236 | 3638.283 | 3641.8869 |
|----------|-----------|----------|-----------|----------|-----------|

|                                              |                             |
|----------------------------------------------|-----------------------------|
| E(RM062X)=                                   | -76.6542152                 |
| Zero-point correction=                       | 0.034536 (Hartree/Particle) |
| Thermal correction to Energy=                | 0.037425                    |
| Thermal correction to Enthalpy=              | 0.038369                    |
| Thermal correction to Gibbs Free Energy=     | 0.015383                    |
| Sum of electronic and zero-point Energies=   | -76.6196792                 |
| Sum of electronic and thermal Energies=      | -76.6167902                 |
| Sum of electronic and thermal Enthalpies=    | -76.6158462                 |
| Sum of electronic and thermal Free Energies= | -76.6388322                 |

## 1-Br

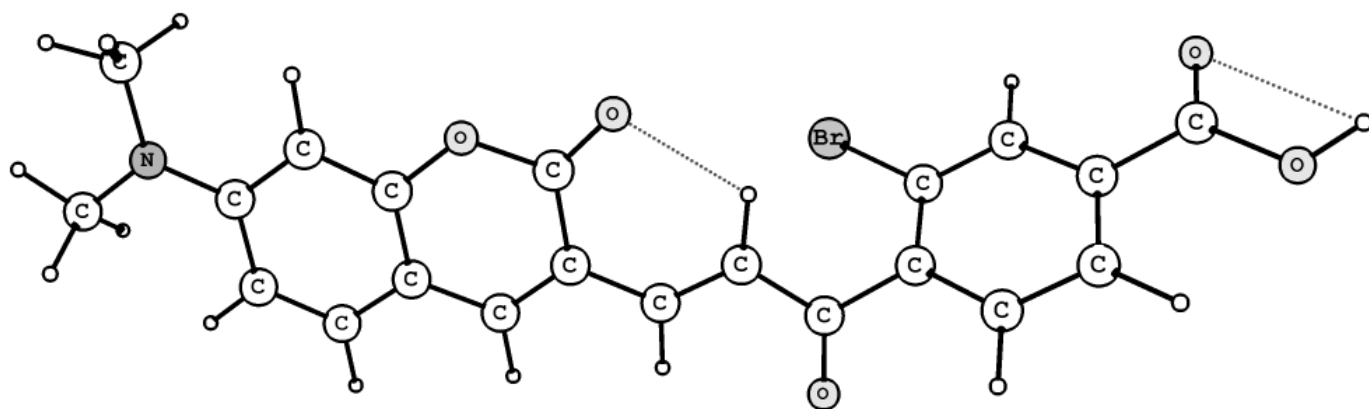

|   |              |              |              |
|---|--------------|--------------|--------------|
| 6 | -0.606978000 | -4.971363000 | -2.774539000 |
| 6 | -0.461784000 | -5.547311000 | -1.478643000 |
| 6 | -0.296167000 | -4.747224000 | -0.371038000 |
| 6 | -0.261376000 | -3.344213000 | -0.474616000 |
| 6 | -0.408510000 | -2.790207000 | -1.755799000 |
| 6 | -0.577915000 | -3.567394000 | -2.890035000 |
| 6 | -0.087192000 | -2.448166000 | 0.619133000  |
| 6 | -0.061979000 | -1.093307000 | 0.454440000  |
| 6 | -0.214589000 | -0.538158000 | -0.902784000 |
| 8 | -0.386838000 | -1.443157000 | -1.930742000 |
| 7 | -0.768918000 | -5.762441000 | -3.877437000 |
| 8 | -0.202155000 | 0.628530000  | -1.200800000 |
| 6 | 0.133101000  | -0.220133000 | 1.600363000  |
| 6 | 0.203819000  | 1.122783000  | 1.619545000  |
| 6 | 0.420811000  | 1.814493000  | 2.910140000  |
| 6 | 0.678581000  | 3.301190000  | 2.863741000  |
| 6 | -0.805716000 | -7.205910000 | -3.741829000 |
| 6 | -0.921128000 | -5.151895000 | -5.183956000 |
| 6 | -0.101245000 | 4.104600000  | 3.701892000  |
| 6 | 0.029047000  | 5.487035000  | 3.698545000  |
| 6 | 0.969928000  | 6.080089000  | 2.854751000  |
| 6 | 1.781023000  | 5.296571000  | 2.035086000  |
| 6 | 1.628387000  | 3.915969000  | 2.042823000  |
| 8 | 0.325318000  | 1.263153000  | 3.992764000  |
| 6 | 1.166295000  | 7.556318000  | 2.804049000  |
| 8 | 1.976171000  | 8.118013000  | 2.106495000  |
| 8 | 0.335209000  | 8.222675000  | 3.629687000  |
| 1 | -0.481298000 | -6.622389000 | -1.352722000 |
| 1 | -0.185476000 | -5.203153000 | 0.609787000  |
| 1 | -0.683230000 | -3.060097000 | -3.840315000 |
| 1 | 0.030665000  | -2.863557000 | 1.619268000  |
| 1 | 0.244684000  | -0.732335000 | 2.556919000  |
| 1 | 0.118632000  | 1.715002000  | 0.717048000  |
| 1 | -1.639420000 | -7.529629000 | -3.105780000 |
| 1 | -0.939232000 | -7.650533000 | -4.727728000 |
| 1 | 0.128745000  | -7.593748000 | -3.317386000 |
| 1 | -1.806956000 | -4.505134000 | -5.222294000 |
| 1 | -0.041174000 | -4.552397000 | -5.448996000 |
| 1 | -1.038122000 | -5.935178000 | -5.932453000 |
| 1 | -0.817280000 | 3.617416000  | 4.357239000  |
| 1 | -0.588425000 | 6.104763000  | 4.341157000  |
| 1 | 2.523398000  | 5.773423000  | 1.403296000  |
| 1 | 0.534562000  | 9.169584000  | 3.530483000  |

35 2.790465000 2.889068000 0.961186000

Frequencies

|           |           |           |           |           |           |
|-----------|-----------|-----------|-----------|-----------|-----------|
| 12.4404   | 21.8255   | 24.9127   | 32.3728   | 54.2308   | 61.9721   |
| 71.5211   | 79.54     | 91.8729   | 98.2898   | 117.8103  | 126.3756  |
| 143.0758  | 165.49    | 174.6183  | 189.6387  | 214.1416  | 230.1378  |
| 232.6635  | 271.2619  | 274.1276  | 283.156   | 291.3605  | 305.3237  |
| 330.3826  | 339.71    | 388.7007  | 405.6521  | 431.3525  | 433.5566  |
| 463.7948  | 473.9114  | 476.3256  | 488.9336  | 514.2039  | 535.7007  |
| 540.404   | 555.7961  | 577.3675  | 630.296   | 641.1007  | 657.2748  |
| 657.8462  | 691.4159  | 699.739   | 715.8124  | 726.9403  | 735.3408  |
| 765.7306  | 790.3049  | 807.0962  | 809.8627  | 822.1984  | 834.9821  |
| 859.6782  | 887.3498  | 888.8978  | 907.3854  | 917.2833  | 957.0188  |
| 966.5847  | 969.492   | 991.1652  | 1017.5898 | 1020.5567 | 1029.7128 |
| 1050.0564 | 1096.0696 | 1101.92   | 1124.0246 | 1150.1551 | 1152.8921 |
| 1157.6097 | 1170.9218 | 1186.0202 | 1199.2285 | 1224.5302 | 1229.2523 |
| 1251.0929 | 1267.4861 | 1286.6042 | 1307.0673 | 1318.7677 | 1331.7142 |
| 1345.6533 | 1353.849  | 1365.1513 | 1407.5396 | 1408.3213 | 1422.2289 |
| 1445.995  | 1448.5445 | 1466.8924 | 1505.013  | 1511.4359 | 1517.0196 |
| 1521.5635 | 1542.4149 | 1544.0129 | 1554.4208 | 1589.5864 | 1620.1419 |
| 1645.602  | 1683.1081 | 1689.79   | 1696.3961 | 1718.7249 | 1804.4901 |
| 1860.6924 | 1867.8493 | 3056.4594 | 3062.9416 | 3112.4807 | 3114.0119 |
| 3183.3248 | 3190.3197 | 3202.9135 | 3206.864  | 3224.6037 | 3229.9809 |
| 3245.8656 | 3260.6158 | 3269.5956 | 3271.3376 | 3273.2936 | 3759.6679 |

|                                              |                             |
|----------------------------------------------|-----------------------------|
| E(RM062X)=                                   | -3812.09596                 |
| Zero-point correction=                       | 0.334273 (Hartree/Particle) |
| Thermal correction to Energy=                | 0.359368                    |
| Thermal correction to Enthalpy=              | 0.360312                    |
| Thermal correction to Gibbs Free Energy=     | 0.275266                    |
| Sum of electronic and zero-point Energies=   | -3811.761687                |
| Sum of electronic and thermal Energies=      | -3811.736592                |
| Sum of electronic and thermal Enthalpies=    | -3811.735648                |
| Sum of electronic and thermal Free Energies= | -3811.820694                |



## 2-Br-a

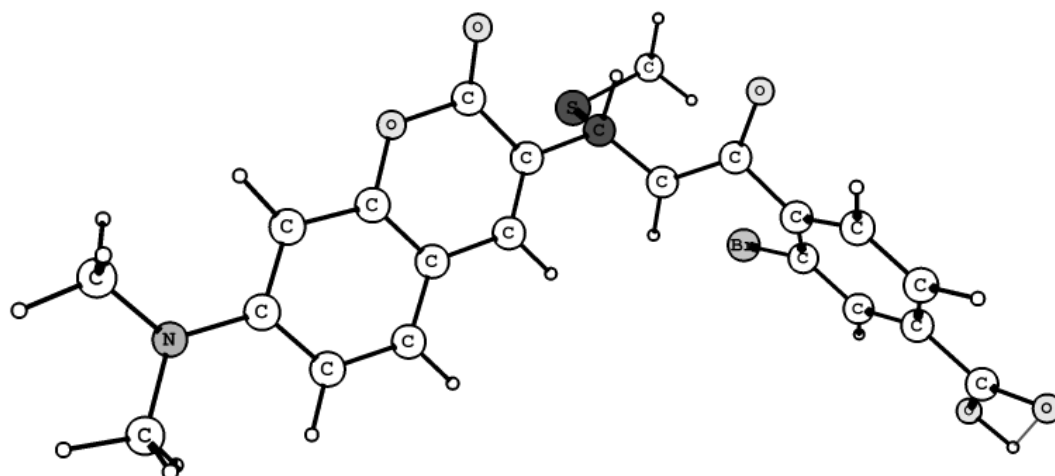

|    |              |              |              |
|----|--------------|--------------|--------------|
| 6  | 0.350854000  | -4.054305000 | -2.481473000 |
| 6  | 1.602418000  | -3.556098000 | -2.044907000 |
| 6  | 1.698592000  | -2.298134000 | -1.475621000 |
| 6  | 0.575967000  | -1.479970000 | -1.299291000 |
| 6  | -0.656312000 | -1.990767000 | -1.717617000 |
| 6  | -0.783764000 | -3.250601000 | -2.294810000 |
| 6  | 0.599652000  | -0.162099000 | -0.716781000 |
| 6  | -0.523237000 | 0.574225000  | -0.570538000 |
| 6  | -1.817876000 | -0.002708000 | -0.981620000 |
| 8  | -1.794642000 | -1.269360000 | -1.558842000 |
| 7  | 0.249056000  | -5.304640000 | -3.089920000 |
| 8  | -2.899917000 | 0.504310000  | -0.847755000 |
| 6  | -0.535946000 | 1.973321000  | -0.014179000 |
| 6  | 0.595203000  | 2.338314000  | 0.864459000  |
| 6  | 0.378100000  | 3.037788000  | 2.036912000  |
| 6  | 1.617629000  | 3.332092000  | 2.871524000  |
| 8  | -0.720408000 | 3.384986000  | 2.561454000  |
| 6  | 1.564754000  | 2.920925000  | 4.215254000  |
| 6  | 2.623842000  | 3.102049000  | 5.086227000  |
| 6  | 3.784580000  | 3.744944000  | 4.636097000  |
| 6  | 3.851576000  | 4.209793000  | 3.323000000  |
| 6  | 2.774499000  | 4.004382000  | 2.465232000  |
| 16 | -0.640499000 | 3.077700000  | -1.543400000 |
| 6  | -0.956940000 | 4.634930000  | -0.673522000 |
| 6  | 1.348934000  | -6.233348000 | -2.922220000 |
| 6  | -1.072913000 | -5.883004000 | -3.224473000 |
| 6  | 4.907665000  | 3.928508000  | 5.576334000  |
| 8  | 5.971121000  | 4.572731000  | 5.032549000  |
| 8  | 4.931590000  | 3.557771000  | 6.731427000  |
| 1  | 2.501317000  | -4.150543000 | -2.150979000 |
| 1  | 2.667917000  | -1.930271000 | -1.147589000 |
| 1  | -1.778044000 | -3.568514000 | -2.581238000 |
| 1  | 1.550245000  | 0.241956000  | -0.378183000 |
| 1  | -1.478300000 | 2.139454000  | 0.518781000  |
| 1  | 1.609833000  | 2.193305000  | 0.508127000  |
| 1  | 0.640736000  | 2.453203000  | 4.543297000  |
| 1  | 2.577094000  | 2.757317000  | 6.114959000  |
| 1  | 4.733714000  | 4.734536000  | 2.973302000  |
| 1  | -0.925235000 | 5.441452000  | -1.411411000 |
| 1  | -1.935025000 | 4.616008000  | -0.185984000 |
| 1  | -0.183547000 | 4.793651000  | 0.082561000  |

|    |              |              |              |
|----|--------------|--------------|--------------|
| 1  | 2.260818000  | -5.841364000 | -3.382554000 |
| 1  | 1.561889000  | -6.453579000 | -1.863416000 |
| 1  | 1.101870000  | -7.167357000 | -3.430417000 |
| 1  | -1.703294000 | -5.255548000 | -3.861154000 |
| 1  | -0.984682000 | -6.858615000 | -3.706341000 |
| 1  | -1.579846000 | -6.011437000 | -2.254132000 |
| 1  | 6.637180000  | 4.629795000  | 5.737379000  |
| 35 | 2.952943000  | 4.716223000  | 0.710376000  |

Frequencies

|           |           |           |           |           |           |
|-----------|-----------|-----------|-----------|-----------|-----------|
| 15.999    | 17.7697   | 26.116    | 28.1936   | 40.4431   | 50.208    |
| 57.3042   | 64.0341   | 79.6353   | 88.4954   | 91.4368   | 103.4348  |
| 104.7666  | 122.4976  | 129.3316  | 141.5931  | 154.7822  | 165.9816  |
| 172.1095  | 192.3176  | 194.2826  | 243.4213  | 245.6384  | 249.4579  |
| 257.5441  | 284.5068  | 292.9865  | 310.5785  | 334.1541  | 348.8592  |
| 362.9504  | 394.7506  | 407.5541  | 434.0948  | 439.4749  | 469.4628  |
| 471.3837  | 480.0055  | 485.9634  | 511.8191  | 535.8995  | 539.6533  |
| 562.8772  | 587.8163  | 613.8159  | 636.3053  | 641.4805  | 650.5707  |
| 657.8757  | 671.5773  | 694.0674  | 697.5122  | 721.8282  | 732.3174  |
| 751.5057  | 758.6681  | 785.0821  | 790.2975  | 796.1102  | 805.3743  |
| 809.1616  | 828.9889  | 860.3271  | 887.5895  | 892.6827  | 922.2218  |
| 939.9729  | 942.4441  | 957.6332  | 972.3858  | 985.6557  | 993.8384  |
| 1013.7618 | 1016.8987 | 1052.549  | 1062.5936 | 1096.8828 | 1127.0939 |
| 1136.5748 | 1141.5666 | 1155.397  | 1169.7594 | 1173.8693 | 1181.1197 |
| 1189.2045 | 1197.9492 | 1219.4444 | 1223.8421 | 1249.0055 | 1256.456  |
| 1274.5341 | 1293.6544 | 1303.3253 | 1316.8939 | 1335.6689 | 1353.6036 |
| 1375.2029 | 1386.1521 | 1397.0446 | 1399.4334 | 1424.1074 | 1435.7289 |
| 1461.8088 | 1480.2598 | 1492.5395 | 1499.1642 | 1506.5244 | 1511.8464 |
| 1515.4232 | 1521.1058 | 1534.8925 | 1539.9203 | 1559.0775 | 1578.5828 |
| 1623.4692 | 1638.4804 | 1654.4661 | 1678.5945 | 1705.2299 | 1725.4637 |
| 1839.3046 | 1868.3334 | 3021.5415 | 3028.7687 | 3076.9255 | 3115.8269 |
| 3129.4472 | 3131.4788 | 3162.7446 | 3165.0688 | 3176.7409 | 3178.7861 |
| 3210.9074 | 3211.4564 | 3224.3633 | 3233.147  | 3237.9003 | 3244.7541 |

|                                              |                           |
|----------------------------------------------|---------------------------|
| E(RM062X)=                                   | -4250.20611               |
| Zero-point correction=                       | 0.3723 (Hartree/Particle) |
| Thermal correction to Energy=                | 0.401155                  |
| Thermal correction to Enthalpy=              | 0.402099                  |
| Thermal correction to Gibbs Free Energy=     | 0.308178                  |
| Sum of electronic and zero-point Energies=   | -4249.83381               |
| Sum of electronic and thermal Energies=      | -4249.804955              |
| Sum of electronic and thermal Enthalpies=    | -4249.804011              |
| Sum of electronic and thermal Free Energies= | -4249.897932              |

2-Br-b

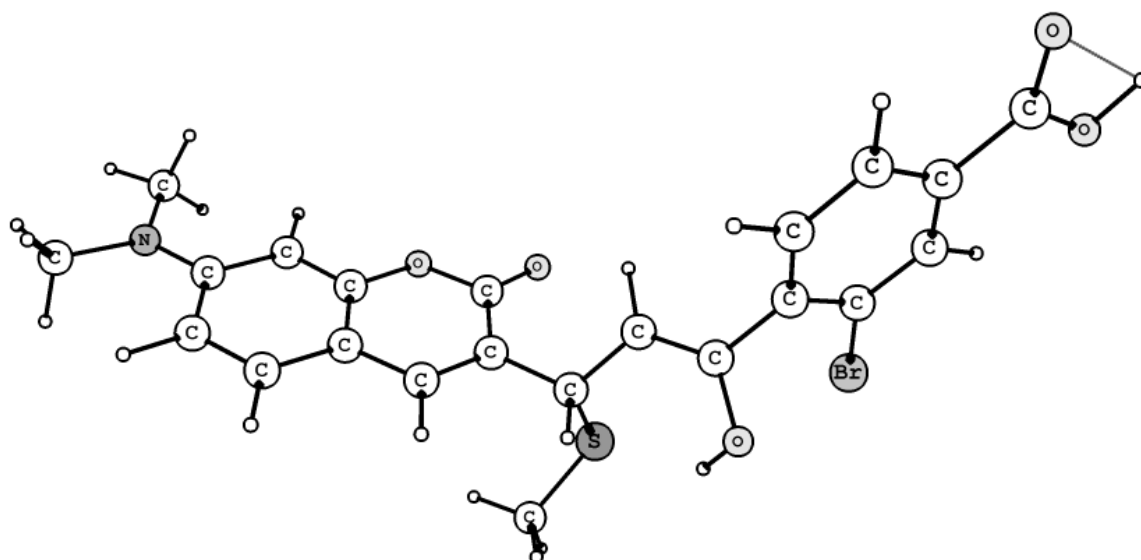

|    |              |              |              |
|----|--------------|--------------|--------------|
| 8  | 1.591271000  | 0.022210000  | 2.010596000  |
| 6  | 2.539587000  | -0.007404000 | 1.269476000  |
| 6  | 2.859175000  | -1.100996000 | 0.336844000  |
| 6  | 1.981379000  | -2.316786000 | 0.345799000  |
| 16 | 2.241002000  | -3.312145000 | 1.893062000  |
| 6  | 3.911760000  | -3.927341000 | 1.545081000  |
| 6  | 0.513207000  | -2.044546000 | 0.169508000  |
| 6  | -0.350251000 | -3.033195000 | -0.100613000 |
| 8  | 0.002128000  | -4.346111000 | -0.193185000 |
| 6  | -1.793671000 | -2.796043000 | -0.348099000 |
| 6  | -2.784129000 | -3.384364000 | 0.447818000  |
| 6  | -4.132710000 | -3.176825000 | 0.191678000  |
| 6  | -4.507773000 | -2.356796000 | -0.873738000 |
| 6  | -5.940319000 | -2.108739000 | -1.192298000 |
| 8  | -6.783063000 | -2.756718000 | -0.363516000 |
| 8  | -6.331415000 | -1.405529000 | -2.093643000 |
| 6  | -3.539815000 | -1.743910000 | -1.668448000 |
| 6  | -2.195252000 | -1.970319000 | -1.403482000 |
| 6  | 3.951797000  | -1.001597000 | -0.457054000 |
| 6  | 4.813020000  | 0.144970000  | -0.416793000 |
| 6  | 5.954283000  | 0.323452000  | -1.214902000 |
| 6  | 6.733756000  | 1.456691000  | -1.118480000 |
| 6  | 6.401223000  | 2.488306000  | -0.196316000 |
| 7  | 7.175244000  | 3.613907000  | -0.092106000 |
| 6  | 6.777778000  | 4.675755000  | 0.811124000  |
| 6  | 8.298980000  | 3.807000000  | -0.986783000 |
| 6  | 5.255901000  | 2.321869000  | 0.605696000  |
| 6  | 4.493963000  | 1.169767000  | 0.483619000  |
| 8  | 3.397664000  | 1.071521000  | 1.284857000  |
| 1  | 2.312412000  | -2.974068000 | -0.471104000 |
| 1  | 4.190666000  | -4.588325000 | 2.368637000  |
| 1  | 4.628492000  | -3.102696000 | 1.498763000  |
| 1  | 3.939939000  | -4.496609000 | 0.610957000  |
| 1  | 0.140830000  | -1.036581000 | 0.308614000  |
| 1  | 0.716079000  | -4.526449000 | 0.450116000  |
| 35 | -2.309163000 | -4.444445000 | 1.933255000  |
| 1  | -4.885976000 | -3.639135000 | 0.819549000  |

|   |              |              |              |
|---|--------------|--------------|--------------|
| 1 | -7.687067000 | -2.535718000 | -0.646213000 |
| 1 | -3.854336000 | -1.108881000 | -2.490367000 |
| 1 | -1.428887000 | -1.516817000 | -2.025234000 |
| 1 | 4.191855000  | -1.808796000 | -1.149365000 |
| 1 | 6.224140000  | -0.453821000 | -1.926116000 |
| 1 | 7.604339000  | 1.552091000  | -1.755169000 |
| 1 | 5.797206000  | 5.091888000  | 0.542174000  |
| 1 | 7.515588000  | 5.476835000  | 0.765837000  |
| 1 | 6.729192000  | 4.316083000  | 1.846082000  |
| 1 | 9.050456000  | 3.018345000  | -0.859471000 |
| 1 | 8.772795000  | 4.761994000  | -0.759611000 |
| 1 | 7.984279000  | 3.822225000  | -2.038934000 |
| 1 | 4.933898000  | 3.065892000  | 1.322936000  |

#### Frequencies

|           |           |           |           |           |           |
|-----------|-----------|-----------|-----------|-----------|-----------|
| 16.0138   | 19.5096   | 21.5381   | 34.8957   | 38.9872   | 50.0124   |
| 56.0487   | 61.6138   | 74.3983   | 77.8308   | 90.0472   | 109.1717  |
| 118.8838  | 129.889   | 149.2588  | 152.0789  | 165.165   | 174.2553  |
| 182.3943  | 189.2866  | 210.5844  | 216.6502  | 247.1658  | 253.0982  |
| 265.8597  | 278.3687  | 291.1039  | 302.3143  | 325.3274  | 332.6023  |
| 372.504   | 407.515   | 414.5448  | 429.8656  | 454.1249  | 467.8222  |
| 471.7485  | 476.7672  | 501.7675  | 518.8294  | 527.1029  | 541.392   |
| 551.194   | 563.0477  | 580.5049  | 626.9326  | 630.5325  | 655.9134  |
| 657.8482  | 672.8234  | 699.049   | 700.0328  | 712.1457  | 729.6803  |
| 749.2965  | 756.4483  | 785.2419  | 791.5282  | 793.5666  | 806.0823  |
| 812.3791  | 826.6139  | 844.7034  | 857.8376  | 887.727   | 895.215   |
| 904.6417  | 947.642   | 957.0339  | 957.7261  | 975.5705  | 988.6221  |
| 992.8194  | 1013.1171 | 1013.8061 | 1049.1881 | 1094.804  | 1099.2447 |
| 1126.0921 | 1147.0838 | 1147.4446 | 1151.4953 | 1159.1906 | 1176.9764 |
| 1186.1667 | 1193.4105 | 1225.2147 | 1228.5428 | 1237.4314 | 1260.7233 |
| 1273.2694 | 1299.7721 | 1300.9857 | 1308.9002 | 1316.7349 | 1339.1986 |
| 1343.7892 | 1377.5046 | 1386.988  | 1402.7254 | 1405.4759 | 1419.1699 |
| 1424.1402 | 1450.0847 | 1456.1024 | 1462.3143 | 1490.5563 | 1502.8414 |
| 1506.2687 | 1509.7982 | 1512.7765 | 1520.5958 | 1544.8204 | 1553.833  |
| 1555.6637 | 1590.2012 | 1626.0701 | 1647.9086 | 1695.2723 | 1703.7824 |
| 1718.8304 | 1752.4654 | 1864.4887 | 1866.4659 | 3050.2529 | 3058.2145 |
| 3060.874  | 3074.9539 | 3109.05   | 3111.02   | 3159.9043 | 3177.5713 |
| 3178.8388 | 3181.4233 | 3190.6332 | 3200.728  | 3221.2337 | 3245.9649 |
| 3252.6834 | 3252.81   | 3258.5917 | 3261.5323 | 3636.1555 | 3765.1361 |

|                                              |                             |
|----------------------------------------------|-----------------------------|
| E(RM062X)=                                   | -4250.74168                 |
| Zero-point correction=                       | 0.386414 (Hartree/Particle) |
| Thermal correction to Energy=                | 0.415267                    |
| Thermal correction to Enthalpy=              | 0.416211                    |
| Thermal correction to Gibbs Free Energy=     | 0.32249                     |
| Sum of electronic and zero-point Energies=   | -4250.355266                |
| Sum of electronic and thermal Energies=      | -4250.326413                |
| Sum of electronic and thermal Enthalpies=    | -4250.325469                |
| Sum of electronic and thermal Free Energies= | -4250.41919                 |

## 2-Br

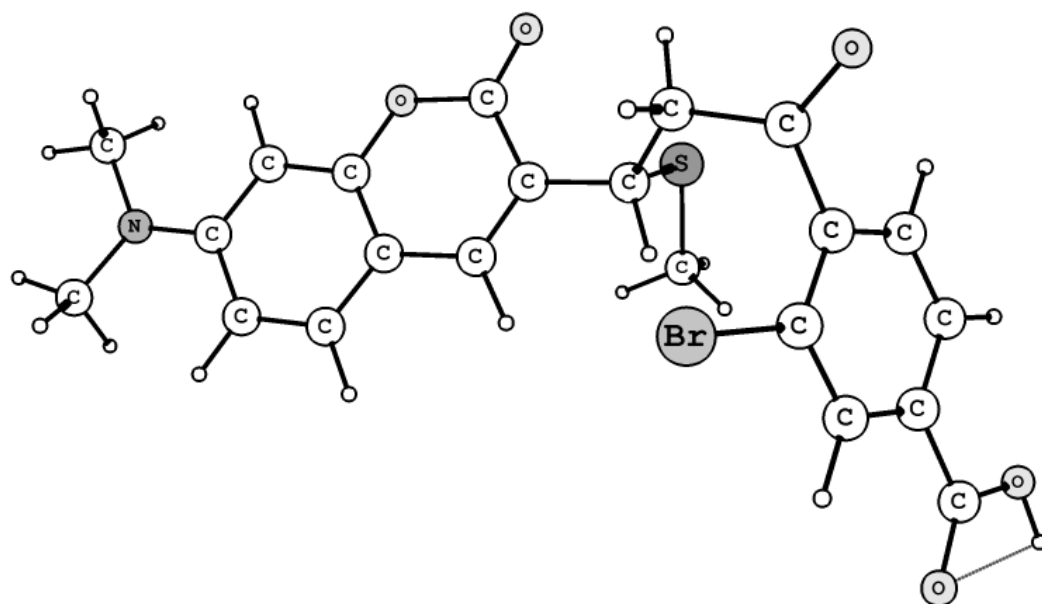

|    |              |              |              |
|----|--------------|--------------|--------------|
| 8  | 0.91498000   | 0.580078000  | 1.225387000  |
| 6  | 2.073320000  | 0.437983000  | 0.924134000  |
| 6  | 2.702100000  | -0.839561000 | 0.556124000  |
| 6  | 1.856714000  | -2.077006000 | 0.605745000  |
| 16 | 1.349144000  | -2.512252000 | 2.320989000  |
| 6  | 2.793917000  | -3.518948000 | 2.750694000  |
| 6  | 0.612945000  | -2.019825000 | -0.286239000 |
| 6  | -0.062367000 | -3.369480000 | -0.479406000 |
| 6  | 0.735278000  | -4.652491000 | -0.348657000 |
| 6  | 1.904781000  | -4.954985000 | -1.049850000 |
| 6  | 2.569188000  | -6.160477000 | -0.865995000 |
| 6  | 2.074461000  | -7.075825000 | 0.061427000  |
| 6  | 0.911018000  | -6.795790000 | 0.781521000  |
| 6  | 0.250827000  | -5.592796000 | 0.567006000  |
| 8  | -1.252758000 | -3.450848000 | -0.680387000 |
| 6  | 4.006975000  | -0.865262000 | 0.195753000  |
| 6  | 4.804230000  | 0.328676000  | 0.179286000  |
| 6  | 6.155764000  | 0.392118000  | -0.196423000 |
| 6  | 6.852577000  | 1.582404000  | -0.193589000 |
| 6  | 6.216492000  | 2.793879000  | 0.195181000  |
| 7  | 6.907550000  | 3.978347000  | 0.209630000  |
| 6  | 6.205902000  | 5.209656000  | 0.513674000  |
| 6  | 8.260801000  | 4.030973000  | -0.307220000 |
| 6  | 4.859196000  | 2.743625000  | 0.565446000  |
| 6  | 4.187808000  | 1.530509000  | 0.551227000  |
| 8  | 2.874485000  | 1.556521000  | 0.912028000  |
| 1  | 2.494741000  | -2.901903000 | 0.277742000  |
| 1  | 2.691292000  | -3.815809000 | 3.796798000  |
| 1  | 3.715290000  | -2.938168000 | 2.642688000  |
| 1  | 2.844336000  | -4.419671000 | 2.128831000  |
| 1  | 0.884724000  | -1.624419000 | -1.273300000 |
| 1  | -0.138220000 | -1.344196000 | 0.131816000  |
| 1  | 3.460801000  | -6.403510000 | -1.434628000 |
| 1  | 0.529525000  | -7.515934000 | 1.497036000  |
| 1  | -0.656375000 | -5.354279000 | 1.113640000  |
| 1  | 4.468029000  | -1.808119000 | -0.099953000 |

|    |             |              |              |
|----|-------------|--------------|--------------|
| 1  | 6.659791000 | -0.522732000 | -0.499214000 |
| 1  | 7.892646000 | 1.583118000  | -0.494854000 |
| 1  | 5.764929000 | 5.171905000  | 1.516578000  |
| 1  | 5.405008000 | 5.413976000  | -0.210788000 |
| 1  | 6.913463000 | 6.038475000  | 0.488864000  |
| 1  | 8.308583000 | 3.729846000  | -1.362997000 |
| 1  | 8.930595000 | 3.383027000  | 0.270181000  |
| 1  | 8.632049000 | 5.052603000  | -0.225271000 |
| 1  | 4.302367000 | 3.623991000  | 0.859834000  |
| 6  | 2.826628000 | -8.351081000 | 0.232644000  |
| 8  | 3.828289000 | -8.641573000 | -0.376355000 |
| 8  | 2.270344000 | -9.164848000 | 1.149335000  |
| 1  | 2.818738000 | -9.967360000 | 1.193420000  |
| 35 | 2.564723000 | -3.780475000 | -2.386723000 |

#### Frequencies

|           |           |           |           |           |           |
|-----------|-----------|-----------|-----------|-----------|-----------|
| 9.1214    | 17.5644   | 22.7697   | 35.8024   | 44.4386   | 49.6128   |
| 56.421    | 62.7632   | 71.0069   | 76.3392   | 83.8845   | 101.151   |
| 109.9919  | 116.1726  | 123.1901  | 140.7267  | 160.149   | 166.762   |
| 180.3891  | 191.9816  | 204.873   | 213.9621  | 242.612   | 256.0489  |
| 263.6519  | 278.8632  | 287.9297  | 294.8258  | 324.2481  | 331.8379  |
| 354.7145  | 390.7449  | 411.1645  | 428.665   | 444.5634  | 466.7147  |
| 471.0416  | 474.9301  | 492.0487  | 502.7252  | 517.7388  | 541.9016  |
| 552.6672  | 579.6302  | 607.2993  | 620.3514  | 637.288   | 644.5632  |
| 652.4616  | 685.8281  | 697.3946  | 702.2468  | 714.4327  | 726.0425  |
| 741.8189  | 754.2878  | 768.9246  | 788.0571  | 794.5626  | 817.0636  |
| 818.1171  | 861.7532  | 864.7297  | 888.9354  | 889.6991  | 945.5855  |
| 955.1978  | 965.0577  | 968.7522  | 974.9008  | 986.7315  | 1006.1824 |
| 1015.036  | 1019.7747 | 1041.3859 | 1092.9958 | 1097.9383 | 1119.7822 |
| 1129.928  | 1147.4366 | 1149.8513 | 1162.8964 | 1181.5538 | 1184.7313 |
| 1192.6375 | 1200.2426 | 1225.1025 | 1230.671  | 1259.6003 | 1275.4788 |
| 1287.5196 | 1295.7967 | 1299.8117 | 1313.5743 | 1322.124  | 1342.1121 |
| 1348.4844 | 1381.8967 | 1389.2921 | 1401.4977 | 1411.6217 | 1423.9016 |
| 1449.7376 | 1453.2228 | 1461.1974 | 1484.6815 | 1492.3168 | 1501.0602 |
| 1501.5062 | 1507.8112 | 1512.9436 | 1517.2384 | 1543.9331 | 1549.4299 |
| 1555.2243 | 1590.6336 | 1625.877  | 1646.5055 | 1698.6103 | 1706.5742 |
| 1717.0029 | 1845.072  | 1855.5899 | 1870.2926 | 3049.4122 | 3057.2091 |
| 3066.5055 | 3093.7345 | 3112.7762 | 3114.5938 | 3140.7593 | 3149.3604 |
| 3159.3806 | 3174.4896 | 3175.1306 | 3185.2122 | 3187.3564 | 3204.5088 |
| 3239.3987 | 3257.2095 | 3267.5604 | 3269.5388 | 3273.2596 | 3777.832  |

|                                              |                             |
|----------------------------------------------|-----------------------------|
| E(RM062X)=                                   | -4250.76213                 |
| Zero-point correction=                       | 0.386407 (Hartree/Particle) |
| Thermal correction to Energy=                | 0.41544                     |
| Thermal correction to Enthalpy=              | 0.416384                    |
| Thermal correction to Gibbs Free Energy=     | 0.321726                    |
| Sum of electronic and zero-point Energies=   | -4250.375723                |
| Sum of electronic and thermal Energies=      | -4250.34669                 |
| Sum of electronic and thermal Enthalpies=    | -4250.345746                |
| Sum of electronic and thermal Free Energies= | -4250.440404                |

The geometries listed below were optimized with the SMD solvation model in water at the M06-2X/6-31G(d) level of theory .

### MeSH

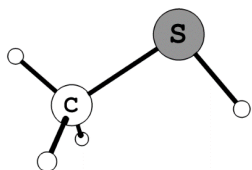

|    |             |              |              |
|----|-------------|--------------|--------------|
| 6  | 1.010871000 | -0.095345000 | -0.048499000 |
| 16 | 2.831520000 | -0.062802000 | 0.037780000  |
| 1  | 0.649110000 | -1.095966000 | -0.289281000 |
| 1  | 0.638096000 | 0.623693000  | -0.779317000 |
| 1  | 0.643700000 | 0.184063000  | 0.940885000  |
| 1  | 3.061435000 | -0.454612000 | -1.225882000 |

#### Frequencies

|           |          |           |           |           |           |
|-----------|----------|-----------|-----------|-----------|-----------|
| 340.5178  | 737.1656 | 819.495   | 1005.6992 | 1115.3278 | 1393.9632 |
| 1474.4596 | 1494.791 | 2729.1588 | 3107.1758 | 3201.0039 | 3205.9331 |

|                                              |                             |
|----------------------------------------------|-----------------------------|
| E(RM062X)=                                   | -438.63133                  |
| Zero-point correction=                       | 0.046987 (Hartree/Particle) |
| Thermal correction to Energy=                | 0.05044                     |
| Thermal correction to Enthalpy=              | 0.051384                    |
| Thermal correction to Gibbs Free Energy=     | 0.02292                     |
| Sum of electronic and zero-point Energies=   | -438.584343                 |
| Sum of electronic and thermal Energies=      | -438.58089                  |
| Sum of electronic and thermal Enthalpies=    | -438.579946                 |
| Sum of electronic and thermal Free Energies= | -438.60841                  |

### MeS-

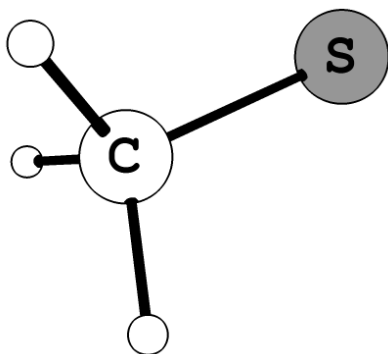

|    |             |              |              |
|----|-------------|--------------|--------------|
| 6  | 1.095680000 | 0.064485000  | -0.050216000 |
| 16 | 2.935568000 | 0.064258000  | -0.050164000 |
| 1  | 0.690724000 | 0.868018000  | -0.675960000 |
| 1  | 0.690708000 | 0.204425000  | 0.958512000  |
| 1  | 0.690984000 | -0.879387000 | -0.432811000 |

#### Frequencies

|          |          |          |           |           |           |
|----------|----------|----------|-----------|-----------|-----------|
| 732.0494 | 961.6285 | 964.9579 | 1371.6824 | 1490.7574 | 1497.6598 |
|----------|----------|----------|-----------|-----------|-----------|

|                                          |                             |
|------------------------------------------|-----------------------------|
| E(RM062X)=                               | -438.156891                 |
| Zero-point correction=                   | 0.037134 (Hartree/Particle) |
| Thermal correction to Energy=            | 0.04017                     |
| Thermal correction to Enthalpy=          | 0.041114                    |
| Thermal correction to Gibbs Free Energy= | 0.013534                    |

|                                              |             |
|----------------------------------------------|-------------|
| Sum of electronic and zero-point Energies=   | -438.119757 |
| Sum of electronic and thermal Energies=      | -438.116721 |
| Sum of electronic and thermal Enthalpies=    | -438.115777 |
| Sum of electronic and thermal Free Energies= | -438.143357 |

## H<sub>2</sub>O

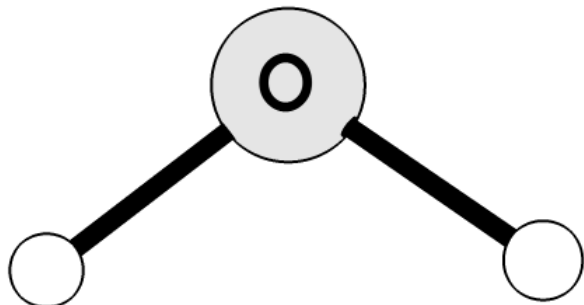

|   |              |              |             |
|---|--------------|--------------|-------------|
| 8 | 0.000028000  | 0.116390000  | 0.000000000 |
| 1 | 0.766442000  | -0.477399000 | 0.000000000 |
| 1 | -0.766470000 | -0.477289000 | 0.000000000 |

### Frequencies

|                                              |                             |
|----------------------------------------------|-----------------------------|
| E(RM062X)=                                   | -76.3990621                 |
| Zero-point correction=                       | 0.021122 (Hartree/Particle) |
| Thermal correction to Energy=                | 0.023957                    |
| Thermal correction to Enthalpy=              | 0.024901                    |
| Thermal correction to Gibbs Free Energy=     | 0.0028                      |
| Sum of electronic and zero-point Energies=   | -76.3779401                 |
| Sum of electronic and thermal Energies=      | -76.3751051                 |
| Sum of electronic and thermal Enthalpies=    | -76.3741611                 |
| Sum of electronic and thermal Free Energies= | -76.3962621                 |

## H<sub>3</sub>O<sup>+</sup>

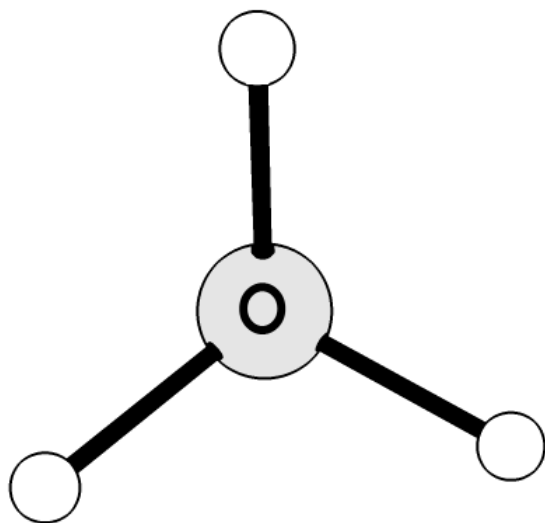

|   |             |              |              |
|---|-------------|--------------|--------------|
| 8 | 1.070116000 | -0.036724000 | 0.059910000  |
| 1 | 0.754495000 | 0.287203000  | 0.933672000  |
| 1 | 0.755268000 | 0.595951000  | -0.625733000 |
| 1 | 2.053889000 | -0.009266000 | 0.064049000  |

### Frequencies



1083.8111 1655.608 1689.1322 3581.8983 3652.4275 3655.5457

|                                              |                             |
|----------------------------------------------|-----------------------------|
| E(RM062X)=                                   | -76.8091483                 |
| Zero-point correction=                       | 0.034898 (Hartree/Particle) |
| Thermal correction to Energy=                | 0.037762                    |
| Thermal correction to Enthalpy=              | 0.038706                    |
| Thermal correction to Gibbs Free Energy=     | 0.015756                    |
| Sum of electronic and zero-point Energies=   | -76.7742503                 |
| Sum of electronic and thermal Energies=      | -76.7713863                 |
| Sum of electronic and thermal Enthalpies=    | -76.7704423                 |
| Sum of electronic and thermal Free Energies= | -76.7933923                 |

## 1-H

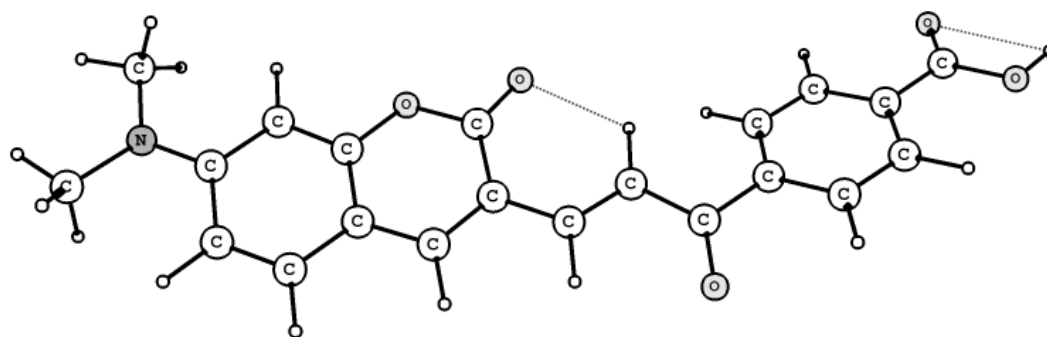

|   |              |              |              |
|---|--------------|--------------|--------------|
| 6 | -0.589005000 | -4.986850000 | -2.768834000 |
| 6 | -0.657596000 | -5.530652000 | -1.444551000 |
| 6 | -0.501365000 | -4.723964000 | -0.346203000 |
| 6 | -0.272465000 | -3.333864000 | -0.479232000 |
| 6 | -0.207658000 | -2.819050000 | -1.787503000 |
| 6 | -0.354820000 | -3.597349000 | -2.916062000 |
| 6 | -0.122829000 | -2.435538000 | 0.598207000  |
| 6 | 0.076300000  | -1.085337000 | 0.408619000  |
| 6 | 0.152632000  | -0.577717000 | -0.954620000 |
| 8 | 0.008783000  | -1.479353000 | -1.980217000 |
| 7 | -0.747505000 | -5.780968000 | -3.852620000 |
| 8 | 0.337973000  | 0.580518000  | -1.290428000 |
| 6 | 0.193273000  | -0.208615000 | 1.554474000  |
| 6 | 0.330878000  | 1.136601000  | 1.580336000  |
| 6 | 0.394494000  | 1.839753000  | 2.868905000  |
| 6 | 0.580273000  | 3.328776000  | 2.848101000  |
| 6 | -1.035172000 | -7.200965000 | -3.693429000 |
| 6 | -0.660307000 | -5.210539000 | -5.189366000 |
| 6 | 0.102393000  | 4.076925000  | 3.930351000  |
| 6 | 0.251564000  | 5.458154000  | 3.950358000  |
| 6 | 0.901036000  | 6.098525000  | 2.889354000  |
| 6 | 1.395488000  | 5.355990000  | 1.814962000  |
| 6 | 1.227623000  | 3.976172000  | 1.788903000  |
| 8 | 0.276993000  | 1.263553000  | 3.953575000  |
| 6 | 1.086510000  | 7.575368000  | 2.868157000  |
| 8 | 1.647496000  | 8.178173000  | 1.970282000  |
| 8 | 0.574406000  | 8.193051000  | 3.938756000  |
| 1 | -0.831726000 | -6.590069000 | -1.302168000 |
| 1 | -0.556335000 | -5.148873000 | 0.652773000  |
| 1 | -0.293687000 | -3.122923000 | -3.887616000 |
| 1 | -0.176309000 | -2.824582000 | 1.613847000  |
| 1 | 0.152150000  | -0.726443000 | 2.513191000  |
| 1 | 0.364699000  | 1.719729000  | 0.670808000  |
| 1 | -1.956267000 | -7.356483000 | -3.121191000 |
| 1 | -1.165578000 | -7.643786000 | -4.679617000 |
| 1 | -0.214199000 | -7.720169000 | -3.186777000 |
| 1 | -1.448905000 | -4.467416000 | -5.356444000 |
| 1 | 0.312354000  | -4.732169000 | -5.349142000 |
| 1 | -0.774222000 | -6.008251000 | -5.921511000 |
| 1 | -0.399613000 | 3.571431000  | 4.749419000  |
| 1 | -0.133752000 | 6.034233000  | 4.784985000  |
| 1 | 1.907007000  | 5.860178000  | 1.001471000  |
| 1 | 1.622782000  | 3.410620000  | 0.950974000  |
| 1 | 0.731988000  | 9.153749000  | 3.856614000  |

Frequencies

|           |           |           |           |           |           |
|-----------|-----------|-----------|-----------|-----------|-----------|
| 20.5476   | 27.1119   | 40.058    | 46.2422   | 65.0804   | 80.6172   |
| 102.6069  | 110.3406  | 112.259   | 129.6656  | 145.9741  | 156.8949  |
| 172.1643  | 180.113   | 209.2559  | 226.4596  | 231.093   | 255.4579  |
| 283.4234  | 293.3083  | 307.8988  | 314.0457  | 332.0831  | 382.6185  |
| 387.9541  | 412.4396  | 431.6224  | 444.8379  | 463.3916  | 472.2384  |
| 474.199   | 484.4277  | 509.5263  | 532.6203  | 535.8639  | 564.3926  |
| 580.8935  | 631.6851  | 639.8323  | 660.0592  | 661.5295  | 692.7112  |
| 700.9023  | 720.9825  | 733.7119  | 735.5473  | 775.6163  | 795.0865  |
| 806.5057  | 815.4281  | 828.1883  | 844.2638  | 869.4024  | 878.5648  |
| 881.5184  | 899.2691  | 911.8629  | 953.8968  | 978.535   | 1001.2224 |
| 1010.9799 | 1014.3919 | 1024.4627 | 1027.8779 | 1032.7563 | 1073.4705 |
| 1098.9908 | 1111.8254 | 1128.0266 | 1152.8791 | 1159.0411 | 1169.7794 |
| 1174.069  | 1194.459  | 1199.545  | 1221.8169 | 1227.7789 | 1243.4774 |
| 1261.7016 | 1296.4828 | 1317.6947 | 1326.7474 | 1337.7009 | 1349.8425 |
| 1361.5668 | 1374.4145 | 1395.8137 | 1406.4252 | 1424.4466 | 1446.7591 |
| 1456.1509 | 1467.8698 | 1498.4287 | 1503.2175 | 1509.609  | 1512.6082 |
| 1530.9211 | 1537.4153 | 1564.1194 | 1568.3943 | 1604.2136 | 1613.2849 |
| 1647.55   | 1658.8277 | 1684.8129 | 1702.0727 | 1727.9821 | 1757.7994 |
| 1771.5635 | 3077.1903 | 3084.3646 | 3139.8544 | 3144.3479 | 3197.0903 |
| 3209.4746 | 3217.8864 | 3221.0279 | 3226.2198 | 3235.1181 | 3245.5094 |
| 3263.5816 | 3265.4099 | 3266.3155 | 3267.6584 | 3301.4629 | 3696.6949 |

|                                              |                             |
|----------------------------------------------|-----------------------------|
| E(RM062X)=                                   | -1240.92425                 |
| Zero-point correction=                       | 0.343724 (Hartree/Particle) |
| Thermal correction to Energy=                | 0.367022                    |
| Thermal correction to Enthalpy=              | 0.367966                    |
| Thermal correction to Gibbs Free Energy=     | 0.289383                    |
| Sum of electronic and zero-point Energies=   | -1240.580526                |
| Sum of electronic and thermal Energies=      | -1240.557228                |
| Sum of electronic and thermal Enthalpies=    | -1240.556284                |
| Sum of electronic and thermal Free Energies= | -1240.634867                |

## 2-H-a

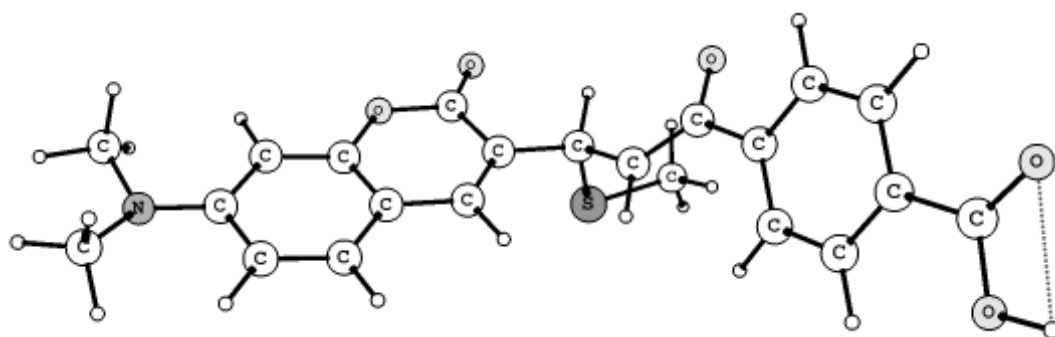

|    |              |              |              |
|----|--------------|--------------|--------------|
| 6  | 0.350379000  | -4.026940000 | -2.566087000 |
| 6  | 1.624428000  | -3.495192000 | -2.210094000 |
| 6  | 1.736133000  | -2.244155000 | -1.643740000 |
| 6  | 0.601726000  | -1.451887000 | -1.383977000 |
| 6  | -0.640592000 | -1.994536000 | -1.726997000 |
| 6  | -0.793203000 | -3.246560000 | -2.300430000 |
| 6  | 0.634037000  | -0.152084000 | -0.788403000 |
| 6  | -0.501616000 | 0.553845000  | -0.544377000 |
| 6  | -1.784404000 | -0.036087000 | -0.907621000 |
| 8  | -1.788415000 | -1.280861000 | -1.481022000 |
| 7  | 0.241425000  | -5.261257000 | -3.160073000 |
| 8  | -2.881675000 | 0.477434000  | -0.739748000 |
| 6  | -0.531752000 | 1.942658000  | 0.042852000  |
| 6  | 0.577276000  | 2.278096000  | 0.976222000  |
| 6  | 0.362508000  | 2.929925000  | 2.164035000  |
| 6  | 1.566989000  | 3.248008000  | 3.015915000  |
| 8  | -0.796422000 | 3.278690000  | 2.649273000  |
| 6  | 1.430772000  | 3.275531000  | 4.411718000  |
| 6  | 2.518307000  | 3.548903000  | 5.231789000  |
| 6  | 3.768887000  | 3.823600000  | 4.668833000  |
| 6  | 3.914810000  | 3.823302000  | 3.276816000  |
| 6  | 2.823793000  | 3.539986000  | 2.463760000  |
| 16 | -0.585691000 | 3.101545000  | -1.427653000 |
| 6  | -0.970537000 | 4.642226000  | -0.554109000 |
| 6  | 1.367036000  | -6.184565000 | -3.056165000 |
| 6  | -1.081965000 | -5.862834000 | -3.257618000 |
| 6  | 4.906845000  | 4.116585000  | 5.570564000  |
| 8  | 6.056198000  | 4.364673000  | 4.924141000  |
| 8  | 4.835168000  | 4.135842000  | 6.788953000  |
| 1  | 2.524505000  | -4.070255000 | -2.388150000 |
| 1  | 2.716668000  | -1.854088000 | -1.382372000 |
| 1  | -1.795230000 | -3.593168000 | -2.520897000 |
| 1  | 1.605197000  | 0.263777000  | -0.528494000 |
| 1  | -1.492869000 | 2.082447000  | 0.546013000  |
| 1  | 1.592392000  | 2.047627000  | 0.669636000  |
| 1  | 0.461256000  | 3.069985000  | 4.855046000  |
| 1  | 2.402288000  | 3.551576000  | 6.311530000  |
| 1  | 4.876173000  | 4.052459000  | 2.828270000  |
| 1  | 2.950071000  | 3.565318000  | 1.385452000  |
| 1  | -0.995032000 | 5.446370000  | -1.294061000 |
| 1  | -1.945806000 | 4.578361000  | -0.063917000 |
| 1  | -0.196294000 | 4.862765000  | 0.186397000  |
| 1  | 2.250405000  | -5.784312000 | -3.559030000 |
| 1  | 1.622635000  | -6.405105000 | -2.010554000 |
| 1  | 1.098517000  | -7.115446000 | -3.555440000 |

|   |              |              |              |
|---|--------------|--------------|--------------|
| 1 | -1.745390000 | -5.241868000 | -3.864948000 |
| 1 | -0.989911000 | -6.831216000 | -3.749207000 |
| 1 | -1.541552000 | -6.010511000 | -2.269857000 |
| 1 | 6.753802000  | 4.547709000  | 5.582287000  |

Frequencies:

|           |           |           |           |           |           |
|-----------|-----------|-----------|-----------|-----------|-----------|
| 17.1283   | 27.4684   | 32.2058   | 38.2445   | 47.1036   | 64.8049   |
| 76.4057   | 79.5601   | 91.1456   | 102.694   | 103.7933  | 122.1509  |
| 131.4223  | 149.3526  | 170.9453  | 175.1841  | 193.1659  | 206.9243  |
| 214.4105  | 231.2756  | 245.7025  | 256.0814  | 258.0865  | 274.4813  |
| 297.4139  | 334.1915  | 345.7136  | 352.0746  | 384.8732  | 400.5593  |
| 419.3415  | 438.833   | 454.1438  | 464.6509  | 476.7326  | 481.1421  |
| 488.2688  | 506.9407  | 529.4565  | 545.2679  | 588.256   | 603.5786  |
| 641.8453  | 642.5605  | 645.1115  | 654.6172  | 670.4139  | 683.1719  |
| 703.9008  | 722.1175  | 726.4443  | 740.1582  | 748.3094  | 765.5977  |
| 792.6553  | 799.7295  | 808.5905  | 811.2241  | 819.0339  | 838.7032  |
| 868.7093  | 873.5553  | 892.4459  | 920.9746  | 952.8882  | 959.1007  |
| 984.2959  | 992.4281  | 1000.7403 | 1005.4106 | 1012.715  | 1018.3355 |
| 1031.5941 | 1054.5348 | 1098.3122 | 1111.8521 | 1122.8639 | 1143.5029 |
| 1150.7269 | 1153.1504 | 1175.979  | 1176.8566 | 1185.665  | 1197.0433 |
| 1207.4829 | 1225.1618 | 1229.8254 | 1240.1797 | 1268.1361 | 1282.2368 |
| 1291.4858 | 1310.7698 | 1328.3471 | 1339.5741 | 1354.5186 | 1377.7702 |
| 1387.4522 | 1389.5841 | 1404.9491 | 1421.6027 | 1441.7835 | 1461.3973 |
| 1467.9983 | 1469.5709 | 1488.3196 | 1490.1334 | 1496.9984 | 1504.1694 |
| 1508.14   | 1526.7622 | 1541.2577 | 1558.7528 | 1572.3945 | 1613.5456 |
| 1620.8428 | 1654.5641 | 1658.5277 | 1688.2674 | 1703.6314 | 1739.6935 |
| 1750.3986 | 3061.0586 | 3067.2751 | 3085.1976 | 3140.9392 | 3148.6173 |
| 3152.9726 | 3178.0041 | 3180.1615 | 3192.6727 | 3206.1683 | 3218.5494 |
| 3220.1085 | 3226.3453 | 3232.0757 | 3234.7336 | 3243.4787 | 3244.897  |

|                                              |                             |
|----------------------------------------------|-----------------------------|
| E(RM062X)=                                   | -1679.10554                 |
| Zero-point correction=                       | 0.382761 (Hartree/Particle) |
| Thermal correction to Energy=                | 0.409604                    |
| Thermal correction to Enthalpy=              | 0.410548                    |
| Thermal correction to Gibbs Free Energy=     | 0.323194                    |
| Sum of electronic and zero-point Energies=   | -1678.722779                |
| Sum of electronic and thermal Energies=      | -1678.695936                |
| Sum of electronic and thermal Enthalpies=    | -1678.694992                |
| Sum of electronic and thermal Free Energies= | -1678.782346                |

## 2-H-b

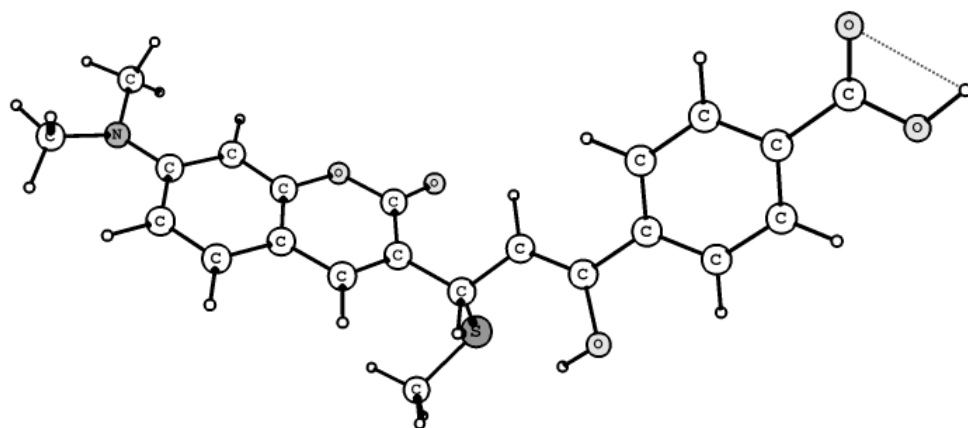

|    |              |              |              |
|----|--------------|--------------|--------------|
| 8  | 1.696805000  | -0.016378000 | 2.252683000  |
| 6  | 2.618422000  | -0.069304000 | 1.452941000  |
| 6  | 2.898452000  | -1.171174000 | 0.543246000  |
| 6  | 2.007132000  | -2.378202000 | 0.565545000  |
| 16 | 2.223214000  | -3.354303000 | 2.132126000  |
| 6  | 3.914772000  | -3.947571000 | 1.855074000  |
| 6  | 0.552215000  | -2.071007000 | 0.346553000  |
| 6  | -0.345574000 | -3.016991000 | 0.022568000  |
| 8  | -0.029541000 | -4.351207000 | -0.050592000 |
| 6  | -1.766546000 | -2.750216000 | -0.293637000 |
| 6  | -2.717178000 | -3.769739000 | -0.150640000 |
| 6  | -4.058511000 | -3.530377000 | -0.430606000 |
| 6  | -4.464260000 | -2.266425000 | -0.866334000 |
| 6  | -5.883614000 | -1.966551000 | -1.179325000 |
| 8  | -6.709394000 | -3.002491000 | -0.980874000 |
| 8  | -6.281556000 | -0.885207000 | -1.578738000 |
| 6  | -3.518861000 | -1.247172000 | -1.023979000 |
| 6  | -2.181447000 | -1.488131000 | -0.745998000 |
| 6  | 3.983203000  | -1.096198000 | -0.273049000 |
| 6  | 4.837527000  | 0.047902000  | -0.284019000 |
| 6  | 5.950426000  | 0.208026000  | -1.130877000 |
| 6  | 6.709122000  | 1.356831000  | -1.106562000 |
| 6  | 6.397650000  | 2.422573000  | -0.211550000 |
| 7  | 7.170703000  | 3.557215000  | -0.177211000 |
| 6  | 6.659203000  | 4.722776000  | 0.531444000  |
| 6  | 8.049958000  | 3.828293000  | -1.309382000 |
| 6  | 5.281042000  | 2.274717000  | 0.637499000  |
| 6  | 4.539543000  | 1.106054000  | 0.582236000  |
| 8  | 3.455589000  | 1.016212000  | 1.422207000  |
| 1  | 2.353729000  | -3.050572000 | -0.230749000 |
| 1  | 4.162961000  | -4.619192000 | 2.680494000  |
| 1  | 4.623644000  | -3.115346000 | 1.851018000  |
| 1  | 3.981928000  | -4.499723000 | 0.913727000  |
| 1  | 0.220572000  | -1.044607000 | 0.449854000  |
| 1  | 0.789048000  | -4.527700000 | 0.451906000  |
| 1  | -2.406878000 | -4.750963000 | 0.191809000  |
| 1  | -4.785366000 | -4.326393000 | -0.307789000 |
| 1  | -7.618316000 | -2.727124000 | -1.208818000 |
| 1  | -3.835850000 | -0.270720000 | -1.376909000 |
| 1  | -1.455355000 | -0.696252000 | -0.900356000 |
| 1  | 4.210067000  | -1.922092000 | -0.945952000 |
| 1  | 6.202090000  | -0.593324000 | -1.820957000 |

|   |             |             |              |
|---|-------------|-------------|--------------|
| 1 | 7.550887000 | 1.441043000 | -1.782316000 |
| 1 | 5.715576000 | 5.085238000 | 0.098852000  |
| 1 | 7.401317000 | 5.518869000 | 0.473660000  |
| 1 | 6.495917000 | 4.495565000 | 1.587639000  |
| 1 | 8.826285000 | 3.064280000 | -1.395226000 |
| 1 | 8.545277000 | 4.784598000 | -1.142964000 |
| 1 | 7.494056000 | 3.879260000 | -2.255810000 |
| 1 | 4.970302000 | 3.048460000 | 1.328655000  |

Frequencies:

|           |           |           |           |           |           |
|-----------|-----------|-----------|-----------|-----------|-----------|
| 14.1156   | 30.2742   | 36.9826   | 47.0967   | 52.3287   | 59.7213   |
| 72.0983   | 78.8161   | 90.6956   | 97.841    | 117.0799  | 125.0503  |
| 138.7118  | 151.9337  | 158.8121  | 171.4506  | 176.3384  | 201.4656  |
| 213.2454  | 225.36    | 235.7763  | 259.061   | 262.5132  | 268.2399  |
| 288.7624  | 309.9703  | 337.6364  | 376.9997  | 387.0323  | 401.4897  |
| 411.8239  | 417.9026  | 442.8413  | 464.8046  | 467.4709  | 478.7622  |
| 484.0593  | 505.3702  | 513.3583  | 534.5234  | 539.0964  | 571.9612  |
| 599.2028  | 629.4977  | 639.5418  | 654.4423  | 656.4726  | 659.574   |
| 698.9705  | 709.053   | 720.7959  | 728.943   | 746.7035  | 756.6576  |
| 784.9178  | 792.198   | 804.5763  | 815.1221  | 822.6314  | 836.4475  |
| 852.4809  | 860.1926  | 875.4371  | 896.77    | 901.2644  | 953.2216  |
| 963.0954  | 990.6778  | 1001.0224 | 1010.0975 | 1012.9532 | 1013.8332 |
| 1024.8906 | 1027.6413 | 1047.0902 | 1099.2498 | 1112.043  | 1126.9084 |
| 1140.0324 | 1148.5022 | 1151.7147 | 1158.7426 | 1186.7785 | 1190.8763 |
| 1197.3989 | 1226.6308 | 1235.3699 | 1237.4855 | 1243.3016 | 1247.2025 |
| 1283.166  | 1300.7533 | 1312.9021 | 1329.2725 | 1342.5717 | 1354.6622 |
| 1377.5947 | 1387.2019 | 1391.155  | 1394.1174 | 1397.7506 | 1419.8858 |
| 1449.0115 | 1462.2003 | 1463.1499 | 1469.7223 | 1488.5546 | 1493.6133 |
| 1496.5426 | 1502.489  | 1505.9681 | 1524.9804 | 1540.3052 | 1569.5124 |
| 1577.815  | 1615.447  | 1654.7186 | 1659.8111 | 1696.7209 | 1704.014  |
| 1736.0631 | 1744.1685 | 1760.6109 | 3058.4173 | 3065.1792 | 3084.3803 |
| 3091.7066 | 3150.2384 | 3152.1662 | 3177.3173 | 3186.7865 | 3197.9408 |
| 3206.2386 | 3207.9368 | 3217.5266 | 3238.9408 | 3243.8576 | 3248.2109 |
| 3255.2392 | 3256.6237 | 3259.7682 | 3265.3007 | 3667.974  | 3704.9697 |

|                                              |                             |
|----------------------------------------------|-----------------------------|
| E(RM062X)=                                   | -1679.57232                 |
| Zero-point correction=                       | 0.395833 (Hartree/Particle) |
| Thermal correction to Energy=                | 0.422978                    |
| Thermal correction to Enthalpy=              | 0.423922                    |
| Thermal correction to Gibbs Free Energy=     | 0.336281                    |
| Sum of electronic and zero-point Energies=   | -1679.176487                |
| Sum of electronic and thermal Energies=      | -1679.149342                |
| Sum of electronic and thermal Enthalpies=    | -1679.148398                |
| Sum of electronic and thermal Free Energies= | -1679.236039                |

## 2-H

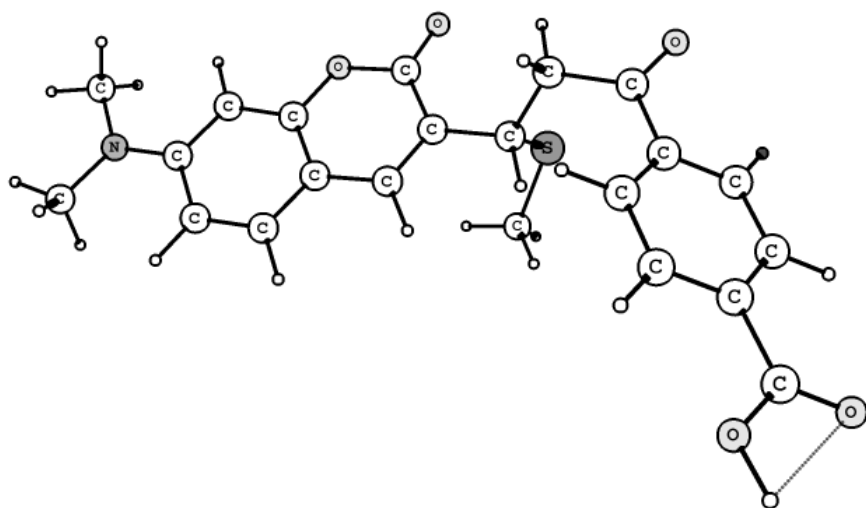

|    |              |              |              |
|----|--------------|--------------|--------------|
| 8  | 0.807056000  | 0.715521000  | 1.071699000  |
| 6  | 1.981744000  | 0.467264000  | 0.843765000  |
| 6  | 2.575831000  | -0.855817000 | 0.733283000  |
| 6  | 1.722534000  | -2.077015000 | 0.930949000  |
| 16 | 1.173375000  | -2.274414000 | 2.676790000  |
| 6  | 2.778438000  | -2.684415000 | 3.412226000  |
| 6  | 0.494480000  | -2.140601000 | 0.008649000  |
| 6  | -0.255412000 | -3.448681000 | 0.139756000  |
| 6  | 0.468060000  | -4.739555000 | -0.101105000 |
| 6  | 1.598095000  | -4.805366000 | -0.924026000 |
| 6  | 2.233295000  | -6.024467000 | -1.140055000 |
| 6  | 1.747355000  | -7.178154000 | -0.520108000 |
| 6  | 2.404148000  | -8.499971000 | -0.718863000 |
| 8  | 3.492375000  | -8.441638000 | -1.494429000 |
| 8  | 2.000113000  | -9.540502000 | -0.231922000 |
| 6  | 0.621706000  | -7.116193000 | 0.307341000  |
| 6  | -0.018337000 | -5.901279000 | 0.510282000  |
| 8  | -1.440205000 | -3.463013000 | 0.445192000  |
| 6  | 3.912674000  | -0.959333000 | 0.493689000  |
| 6  | 4.743226000  | 0.187940000  | 0.328014000  |
| 6  | 6.127116000  | 0.148448000  | 0.064356000  |
| 6  | 6.862179000  | 1.302008000  | -0.087404000 |
| 6  | 6.240866000  | 2.584077000  | 0.021503000  |
| 7  | 6.966357000  | 3.725312000  | -0.121562000 |
| 6  | 6.310937000  | 5.017839000  | -0.010297000 |
| 6  | 8.389751000  | 3.658820000  | -0.417689000 |
| 6  | 4.852181000  | 2.636061000  | 0.281866000  |
| 6  | 4.149566000  | 1.453134000  | 0.426195000  |
| 8  | 2.802830000  | 1.555354000  | 0.679383000  |
| 1  | 2.360575000  | -2.942818000 | 0.725207000  |
| 1  | 2.611299000  | -2.871272000 | 4.475689000  |
| 1  | 3.482169000  | -1.854324000 | 3.306758000  |
| 1  | 3.193474000  | -3.585806000 | 2.953043000  |
| 1  | 0.834372000  | -2.025435000 | -1.028763000 |
| 1  | -0.207416000 | -1.333804000 | 0.225984000  |
| 1  | 3.103066000  | -6.073062000 | -1.786134000 |
| 1  | 3.869079000  | -9.338563000 | -1.582871000 |
| 1  | 0.254843000  | -8.017961000 | 0.787294000  |
| 1  | -0.890947000 | -5.843942000 | 1.153827000  |
| 1  | 4.369486000  | -1.945687000 | 0.420525000  |



|   |             |              |              |
|---|-------------|--------------|--------------|
| 1 | 6.614399000 | -0.819502000 | -0.021859000 |
| 1 | 7.923449000 | 1.228434000  | -0.290540000 |
| 1 | 5.838516000 | 5.139955000  | 0.971482000  |
| 1 | 5.543617000 | 5.146111000  | -0.783712000 |
| 1 | 7.055698000 | 5.803237000  | -0.131365000 |
| 1 | 8.578696000 | 3.142119000  | -1.366092000 |
| 1 | 8.939657000 | 3.142933000  | 0.377804000  |
| 1 | 8.778116000 | 4.673306000  | -0.499003000 |
| 1 | 4.318030000 | 3.574114000  | 0.372411000  |
| 1 | 1.982650000 | -3.914574000 | -1.412753000 |

#### Frequencies

|           |           |           |           |           |           |
|-----------|-----------|-----------|-----------|-----------|-----------|
| 15.751    | 25.5635   | 38.2888   | 57.5697   | 59.2346   | 67.3648   |
| 73.5798   | 86.0381   | 91.6928   | 99.3246   | 113.9268  | 116.2406  |
| 127.9591  | 143.702   | 146.8728  | 176.3867  | 184.5411  | 197.8617  |
| 208.123   | 230.8941  | 234.3171  | 255.8652  | 266.1677  | 288.9014  |
| 298.1747  | 307.901   | 327.5452  | 353.2607  | 399.6143  | 410.4496  |
| 418.4496  | 439.1096  | 452.5858  | 458.5906  | 473.7112  | 478.3219  |
| 483.9455  | 495.0442  | 535.9446  | 546.6744  | 549.9285  | 572.1799  |
| 622.0759  | 630.2305  | 641.1969  | 660.8767  | 662.6049  | 694.588   |
| 701.8977  | 718.3765  | 729.2618  | 742.8395  | 751.9334  | 764.1887  |
| 793.9933  | 801.6561  | 815.1059  | 828.9858  | 831.2151  | 846.441   |
| 871.1402  | 888.4904  | 892.7273  | 952.0855  | 964.9227  | 976.6473  |
| 990.0976  | 999.2751  | 1006.2591 | 1011.0727 | 1017.0182 | 1020.2707 |
| 1031.2259 | 1066.2366 | 1097.0053 | 1103.3445 | 1114.3424 | 1130.1329 |
| 1148.5424 | 1159.9289 | 1168.5119 | 1170.1963 | 1177.6386 | 1192.9919 |
| 1203.1226 | 1228.586  | 1232.5371 | 1236.4348 | 1280.216  | 1280.9953 |
| 1294.6178 | 1318.389  | 1326.7853 | 1331.5456 | 1340.9982 | 1361.358  |
| 1378.1548 | 1378.8067 | 1399.3444 | 1404.6171 | 1423.1922 | 1452.7192 |
| 1458.5178 | 1470.8111 | 1474.0292 | 1477.1966 | 1487.5022 | 1496.467  |
| 1500.4001 | 1508.8568 | 1510.2275 | 1528.6804 | 1538.2638 | 1565.4135 |
| 1582.2686 | 1610.6369 | 1655.6164 | 1657.6766 | 1699.5951 | 1701.6568 |
| 1747.1594 | 1764.2593 | 1772.2646 | 3069.4845 | 3075.7839 | 3084.0116 |
| 3091.5328 | 3123.5514 | 3129.0446 | 3133.1764 | 3172.1088 | 3178.0832 |
| 3189.3248 | 3200.0957 | 3215.3049 | 3215.7838 | 3226.9651 | 3228.0757 |
| 3240.2556 | 3251.7262 | 3258.7422 | 3261.499  | 3262.9288 | 3714.539  |

|                                              |                             |
|----------------------------------------------|-----------------------------|
| E(RM062X)=                                   | -1679.58872                 |
| Zero-point correction=                       | 0.396622 (Hartree/Particle) |
| Thermal correction to Energy=                | 0.423541                    |
| Thermal correction to Enthalpy=              | 0.424485                    |
| Thermal correction to Gibbs Free Energy=     | 0.337576                    |
| Sum of electronic and zero-point Energies=   | -1679.192098                |
| Sum of electronic and thermal Energies=      | -1679.165179                |
| Sum of electronic and thermal Enthalpies=    | -1679.164235                |
| Sum of electronic and thermal Free Energies= | -1679.251144                |

## 1-Br

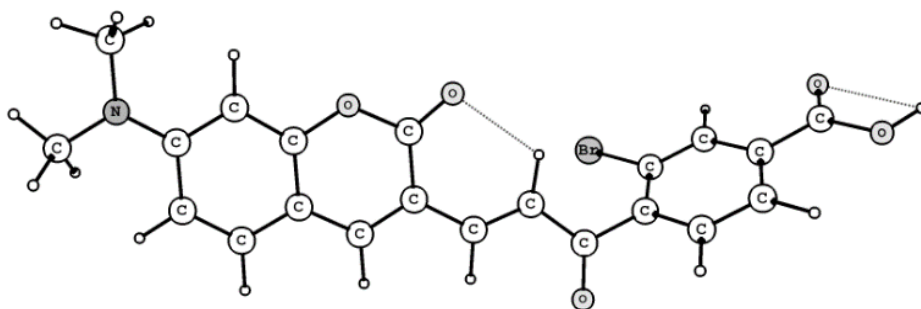

|    |              |              |              |
|----|--------------|--------------|--------------|
| 6  | -0.661523000 | -4.941287000 | -2.770940000 |
| 6  | -0.524863000 | -5.527430000 | -1.470042000 |
| 6  | -0.320047000 | -4.741175000 | -0.365381000 |
| 6  | -0.233711000 | -3.332626000 | -0.469347000 |
| 6  | -0.374739000 | -2.774912000 | -1.754191000 |
| 6  | -0.584149000 | -3.531084000 | -2.887866000 |
| 6  | -0.015386000 | -2.459782000 | 0.615959000  |
| 6  | 0.065945000  | -1.093675000 | 0.455799000  |
| 6  | -0.081690000 | -0.537826000 | -0.882568000 |
| 8  | -0.298122000 | -1.415479000 | -1.916736000 |
| 7  | -0.856569000 | -5.717319000 | -3.861495000 |
| 8  | -0.034940000 | 0.642238000  | -1.189287000 |
| 6  | 0.290764000  | -0.249031000 | 1.607912000  |
| 6  | 0.418133000  | 1.096102000  | 1.656062000  |
| 6  | 0.607488000  | 1.770337000  | 2.942328000  |
| 6  | 0.770970000  | 3.266964000  | 2.901221000  |
| 6  | -0.915013000 | -7.168660000 | -3.734391000 |
| 6  | -1.001426000 | -5.103424000 | -5.173982000 |
| 6  | -0.166941000 | 4.041675000  | 3.589076000  |
| 6  | -0.113334000 | 5.429860000  | 3.551252000  |
| 6  | 0.902385000  | 6.055987000  | 2.826232000  |
| 6  | 1.864967000  | 5.300105000  | 2.156914000  |
| 6  | 1.787202000  | 3.915333000  | 2.195781000  |
| 8  | 0.570670000  | 1.207769000  | 4.035761000  |
| 6  | 1.014366000  | 7.539776000  | 2.752127000  |
| 8  | 1.901832000  | 8.123951000  | 2.158331000  |
| 8  | 0.036654000  | 8.175586000  | 3.403846000  |
| 1  | -0.584712000 | -6.602056000 | -1.351144000 |
| 1  | -0.216514000 | -5.196793000 | 0.615955000  |
| 1  | -0.680970000 | -3.027104000 | -3.841476000 |
| 1  | 0.093922000  | -2.882621000 | 1.613376000  |
| 1  | 0.364844000  | -0.792608000 | 2.550415000  |
| 1  | 0.371624000  | 1.714612000  | 0.769220000  |
| 1  | -1.749023000 | -7.478696000 | -3.095163000 |
| 1  | -1.061615000 | -7.599767000 | -4.723389000 |
| 1  | 0.016331000  | -7.568373000 | -3.318736000 |
| 1  | -1.857502000 | -4.419644000 | -5.197000000 |
| 1  | -0.099318000 | -4.546401000 | -5.452476000 |
| 1  | -1.166418000 | -5.885073000 | -5.913775000 |
| 1  | -0.954715000 | 3.541154000  | 4.144786000  |
| 1  | -0.856912000 | 6.016695000  | 4.079030000  |
| 1  | 2.663460000  | 5.797704000  | 1.616274000  |
| 1  | 0.167929000  | 9.139774000  | 3.314533000  |
| 35 | 3.136405000  | 2.918871000  | 1.317136000  |

Frequencies

|           |           |           |           |           |           |
|-----------|-----------|-----------|-----------|-----------|-----------|
| 9.9976    | 21.2194   | 25.9354   | 40.5634   | 62.46     | 76.3273   |
| 83.1532   | 87.7973   | 98.6522   | 115.9552  | 123.5647  | 129.3352  |
| 142.9234  | 166.8537  | 175.2802  | 186.0111  | 210.7468  | 228.7337  |
| 231.8926  | 266.3717  | 280.754   | 284.6876  | 300.4701  | 305.7795  |
| 331.2794  | 343.8116  | 385.2589  | 398.2773  | 429.0569  | 436.5236  |
| 462.8194  | 475.4432  | 476.5547  | 490.4217  | 517.4868  | 533.5264  |
| 538.3842  | 554.7928  | 575.8847  | 620.053   | 632.6752  | 656.2797  |
| 661.4839  | 688.9575  | 701.062   | 722.5049  | 730.9135  | 736.0065  |
| 772.8084  | 782.5334  | 804.0189  | 809.2131  | 827.4644  | 834.5489  |
| 852.349   | 884.0534  | 888.6591  | 906.9312  | 909.1991  | 952.1177  |
| 970.6537  | 985.6003  | 1008.1845 | 1011.5932 | 1018.7218 | 1031.0703 |
| 1049.6979 | 1091.2841 | 1098.8213 | 1124.6588 | 1144.8302 | 1153.7371 |
| 1166.0719 | 1170.0574 | 1176.1246 | 1192.6973 | 1209.2759 | 1226.6865 |
| 1243.6448 | 1255.6803 | 1293.088  | 1297.3753 | 1319.1301 | 1330.6801 |
| 1343.1804 | 1344.858  | 1369.5287 | 1390.3745 | 1405.708  | 1424.3793 |
| 1442.6237 | 1447.5055 | 1466.9634 | 1497.8696 | 1500.7034 | 1502.8666 |
| 1506.9958 | 1528.3523 | 1532.5164 | 1547.6652 | 1567.6087 | 1604.3971 |
| 1613.126  | 1644.5646 | 1650.788  | 1686.2556 | 1695.8185 | 1735.4312 |
| 1761.0657 | 1777.8123 | 3073.3359 | 3082.9544 | 3133.5645 | 3144.0512 |
| 3195.6618 | 3210.3026 | 3220.5325 | 3229.3711 | 3240.1051 | 3244.9619 |
| 3258.5841 | 3266.3398 | 3269.7007 | 3273.0801 | 3290.1212 | 3704.5739 |

|                                              |                             |
|----------------------------------------------|-----------------------------|
| E(RM062X)=                                   | -3812.1272                  |
| Zero-point correction=                       | 0.333465 (Hartree/Particle) |
| Thermal correction to Energy=                | 0.358414                    |
| Thermal correction to Enthalpy=              | 0.359358                    |
| Thermal correction to Gibbs Free Energy=     | 0.27511                     |
| Sum of electronic and zero-point Energies=   | -3811.793735                |
| Sum of electronic and thermal Energies=      | -3811.768786                |
| Sum of electronic and thermal Enthalpies=    | -3811.767842                |
| Sum of electronic and thermal Free Energies= | -3811.85209                 |

## 2-Br-a

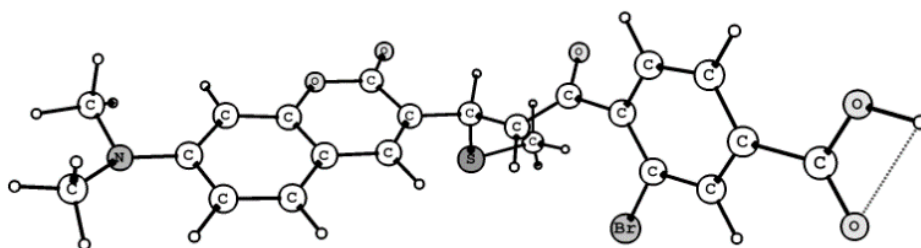

|    |              |              |              |
|----|--------------|--------------|--------------|
| 6  | 0.484392000  | -3.821364000 | -2.843948000 |
| 6  | 1.703927000  | -3.108458000 | -2.660181000 |
| 6  | 1.726819000  | -1.899397000 | -1.999021000 |
| 6  | 0.552667000  | -1.329933000 | -1.472619000 |
| 6  | -0.631872000 | -2.052464000 | -1.643078000 |
| 6  | -0.692625000 | -3.271331000 | -2.299439000 |
| 6  | 0.492143000  | -0.079760000 | -0.779941000 |
| 6  | -0.676092000 | 0.413210000  | -0.292888000 |
| 6  | -1.897817000 | -0.358782000 | -0.484809000 |
| 8  | -1.810805000 | -1.559630000 | -1.138832000 |
| 7  | 0.455757000  | -5.002611000 | -3.558114000 |
| 8  | -3.013843000 | -0.037503000 | -0.102050000 |
| 6  | -0.809434000 | 1.742697000  | 0.404340000  |
| 6  | 0.385384000  | 2.186560000  | 1.171045000  |
| 6  | 0.288255000  | 2.775392000  | 2.398869000  |
| 6  | 1.575583000  | 3.172696000  | 3.082254000  |
| 8  | -0.792973000 | 2.980024000  | 3.098959000  |
| 6  | 2.505020000  | 4.097195000  | 2.593032000  |
| 6  | 3.664559000  | 4.411513000  | 3.293589000  |
| 6  | 3.915023000  | 3.801524000  | 4.521285000  |
| 6  | 2.995163000  | 2.888974000  | 5.048887000  |
| 6  | 1.845039000  | 2.594584000  | 4.332274000  |
| 16 | -1.276366000 | 2.966209000  | -0.933216000 |
| 6  | -1.662075000 | 4.386782000  | 0.120526000  |
| 6  | 1.709053000  | -5.738099000 | -3.708604000 |
| 6  | -0.726846000 | -5.846562000 | -3.420056000 |
| 6  | 5.164259000  | 4.164258000  | 5.236385000  |
| 8  | 5.291182000  | 3.558429000  | 6.423499000  |
| 8  | 6.002455000  | 4.935708000  | 4.802665000  |
| 1  | 2.633835000  | -3.506690000 | -3.045309000 |
| 1  | 2.667923000  | -1.369817000 | -1.874071000 |
| 1  | -1.654462000 | -3.762292000 | -2.377840000 |
| 1  | 1.418789000  | 0.475815000  | -0.652903000 |
| 1  | -1.679522000 | 1.700761000  | 1.066483000  |
| 1  | 1.358043000  | 2.139832000  | 0.690499000  |
| 1  | 4.371481000  | 5.132271000  | 2.896048000  |
| 1  | 3.178568000  | 2.412593000  | 6.006034000  |
| 1  | 1.124749000  | 1.888853000  | 4.737276000  |
| 1  | -1.900228000 | 5.229982000  | -0.533491000 |
| 1  | -2.523816000 | 4.177045000  | 0.760144000  |
| 1  | -0.794659000 | 4.643428000  | 0.734460000  |
| 1  | 2.445147000  | -5.154086000 | -4.264048000 |
| 1  | 2.138608000  | -6.021219000 | -2.737085000 |
| 1  | 1.510270000  | -6.643959000 | -4.281556000 |
| 1  | -1.623460000 | -5.319432000 | -3.752447000 |
| 1  | -0.603104000 | -6.722318000 | -4.057391000 |
| 1  | -0.875686000 | -6.181013000 | -2.382909000 |
| 1  | 6.129008000  | 3.844032000  | 6.835927000  |

35 2.225667000 5.004961000 0.949910000

Frequencies

|           |           |           |           |           |           |
|-----------|-----------|-----------|-----------|-----------|-----------|
| 16.1867   | 19.5481   | 32.1791   | 35.218    | 52.354    | 65.5033   |
| 76.1248   | 88.9946   | 92.0691   | 95.8387   | 116.7312  | 118.8389  |
| 128.5449  | 136.1385  | 150.9486  | 170.4882  | 171.4867  | 182.1902  |
| 195.4719  | 200.6493  | 213.7277  | 243.1096  | 253.7418  | 257.5531  |
| 262.7458  | 286.7421  | 293.0123  | 311.7496  | 347.3993  | 356.2207  |
| 373.8254  | 392.2375  | 411.792   | 437.1217  | 445.7191  | 471.0426  |
| 478.3988  | 484.5754  | 496.1052  | 518.853   | 537.2594  | 542.0149  |
| 563.4704  | 587.4537  | 619.0485  | 640.5666  | 643.2388  | 657.7417  |
| 674.718   | 681.2076  | 692.181   | 724.5717  | 732.481   | 741.6557  |
| 747.6671  | 764.4425  | 783.8396  | 799.8338  | 801.6799  | 811.6884  |
| 826.1365  | 829.7803  | 850.6668  | 889.7605  | 893.1464  | 923.1919  |
| 951.8601  | 962.3767  | 972.7249  | 991.2809  | 999.3064  | 1000.3684 |
| 1012.8192 | 1022.5288 | 1046.2003 | 1066.0673 | 1095.564  | 1120.8089 |
| 1141.1857 | 1141.5464 | 1161.0701 | 1172.5851 | 1182.4435 | 1186.3764 |
| 1192.4308 | 1211.5835 | 1215.167  | 1226.2242 | 1240.5027 | 1267.2569 |
| 1282.1146 | 1294.6326 | 1301.8021 | 1312.3178 | 1337.6064 | 1349.7008 |
| 1378.7787 | 1384.7036 | 1387.7543 | 1407.3409 | 1420.2424 | 1439.4234 |
| 1454.2218 | 1467.3562 | 1474.2986 | 1484.4505 | 1491.2515 | 1501.44   |
| 1505.3095 | 1508.5211 | 1525.906  | 1542.9479 | 1545.8385 | 1574.7794 |
| 1616.9481 | 1630.2452 | 1644.5867 | 1661.5055 | 1692.0113 | 1703.0531 |
| 1736.9963 | 1764.2786 | 3055.2096 | 3062.4335 | 3086.6387 | 3138.3616 |
| 3157.3202 | 3157.3914 | 3177.7621 | 3183.7528 | 3195.8869 | 3202.9354 |
| 3210.3137 | 3218.9329 | 3224.3759 | 3241.027  | 3259.8303 | 3266.0605 |

|                                              |                             |
|----------------------------------------------|-----------------------------|
| E(RM062X)=                                   | -4250.31231                 |
| Zero-point correction=                       | 0.373493 (Hartree/Particle) |
| Thermal correction to Energy=                | 0.401599                    |
| Thermal correction to Enthalpy=              | 0.402543                    |
| Thermal correction to Gibbs Free Energy=     | 0.312042                    |
| Sum of electronic and zero-point Energies=   | -4249.938817                |
| Sum of electronic and thermal Energies=      | -4249.910711                |
| Sum of electronic and thermal Enthalpies=    | -4249.909767                |
| Sum of electronic and thermal Free Energies= | -4250.000268                |

2-Br-b

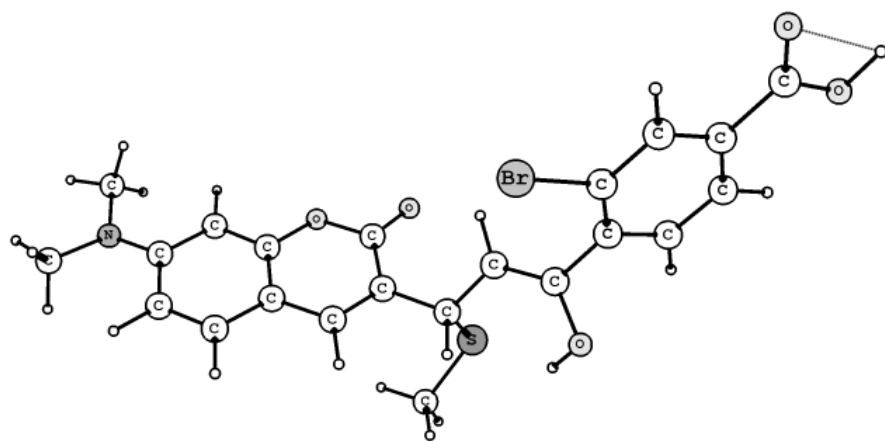

|    |              |              |              |
|----|--------------|--------------|--------------|
| 8  | 1.627329000  | 0.048321000  | 2.105808000  |
| 6  | 2.553460000  | 0.006928000  | 1.309520000  |
| 6  | 2.834841000  | -1.076876000 | 0.381108000  |
| 6  | 1.969484000  | -2.302018000 | 0.401150000  |
| 16 | 2.222411000  | -3.291314000 | 1.953053000  |
| 6  | 3.931056000  | -3.827809000 | 1.665608000  |
| 6  | 0.504395000  | -2.032806000 | 0.202050000  |
| 6  | -0.362434000 | -2.996633000 | -0.132285000 |
| 8  | -0.031518000 | -4.327153000 | -0.230340000 |
| 6  | -1.803933000 | -2.770612000 | -0.398849000 |
| 6  | -2.729038000 | -3.552215000 | 0.307365000  |
| 6  | -4.096964000 | -3.396699000 | 0.136554000  |
| 6  | -4.567112000 | -2.443087000 | -0.769342000 |
| 6  | -6.020648000 | -2.226904000 | -1.003792000 |
| 8  | -6.799454000 | -3.021951000 | -0.263346000 |
| 8  | -6.468954000 | -1.410892000 | -1.788606000 |
| 6  | -3.669462000 | -1.666936000 | -1.499420000 |
| 6  | -2.302490000 | -1.838151000 | -1.318535000 |
| 6  | 3.910725000  | -0.976735000 | -0.446115000 |
| 6  | 4.770032000  | 0.160722000  | -0.428232000 |
| 6  | 5.895912000  | 0.326508000  | -1.258200000 |
| 6  | 6.696632000  | 1.441223000  | -1.164797000 |
| 6  | 6.417359000  | 2.465543000  | -0.208731000 |
| 7  | 7.245251000  | 3.539996000  | -0.079557000 |
| 6  | 6.881848000  | 4.624985000  | 0.818638000  |
| 6  | 8.318749000  | 3.749398000  | -1.040108000 |
| 6  | 5.272958000  | 2.323984000  | 0.608483000  |
| 6  | 4.491910000  | 1.188536000  | 0.482356000  |
| 8  | 3.395103000  | 1.090399000  | 1.305103000  |
| 1  | 2.320562000  | -2.956360000 | -0.408277000 |
| 1  | 4.197759000  | -4.509239000 | 2.477066000  |
| 1  | 4.615398000  | -2.975479000 | 1.679371000  |
| 1  | 4.014971000  | -4.357645000 | 0.712833000  |
| 1  | 0.137441000  | -1.018609000 | 0.312012000  |
| 1  | 0.795157000  | -4.500898000 | 0.261001000  |
| 1  | -2.353265000 | -4.286553000 | 1.013608000  |
| 1  | -4.788800000 | -4.007861000 | 0.705718000  |
| 1  | -7.734862000 | -2.827699000 | -0.466809000 |
| 1  | -4.044970000 | -0.942225000 | -2.214078000 |
| 35 | -1.157728000 | -0.789441000 | -2.404651000 |
| 1  | 4.133458000  | -1.786299000 | -1.139981000 |
| 1  | 6.128600000  | -0.449240000 | -1.983438000 |

|   |             |             |              |
|---|-------------|-------------|--------------|
| 1 | 7.551853000 | 1.530747000 | -1.822991000 |
| 1 | 5.943503000 | 5.108431000 | 0.515589000  |
| 1 | 7.676353000 | 5.370365000 | 0.808765000  |
| 1 | 6.769706000 | 4.260021000 | 1.844667000  |
| 1 | 9.022981000 | 2.911570000 | -1.032787000 |
| 1 | 8.865351000 | 4.649624000 | -0.761825000 |
| 1 | 7.932995000 | 3.876461000 | -2.059835000 |
| 1 | 4.987548000 | 3.071674000 | 1.338540000  |

Frequencies

|           |           |           |           |           |           |
|-----------|-----------|-----------|-----------|-----------|-----------|
| 18.2944   | 22.3463   | 39.8506   | 45.5433   | 51.7599   | 57.8204   |
| 64.9055   | 78.094    | 93.4854   | 113.6035  | 122.1194  | 123.5442  |
| 134.1362  | 140.2508  | 153.4156  | 158.7578  | 165.5399  | 173.3539  |
| 185.1811  | 208.9804  | 213.7042  | 229.1255  | 252.8982  | 257.9879  |
| 267.8778  | 280.1677  | 288.2583  | 300.0271  | 326.9565  | 327.6011  |
| 375.8216  | 402.2745  | 421.3434  | 425.7366  | 451.2832  | 462.9259  |
| 471.9065  | 476.3908  | 482.5962  | 506.0812  | 526.3611  | 536.0045  |
| 540.1836  | 551.6007  | 573.7938  | 610.8499  | 629.533   | 653.3197  |
| 657.0497  | 673.1252  | 689.7572  | 701.2083  | 712.039   | 724.1374  |
| 747.3503  | 760.0941  | 781.9308  | 795.3503  | 800.1089  | 804.5704  |
| 815.2247  | 822.6341  | 833.2609  | 855.8486  | 885.1408  | 897.3359  |
| 902.7498  | 952.5804  | 963.0966  | 971.907   | 987.8958  | 998.6505  |
| 1008.1842 | 1012.171  | 1026.8915 | 1030.4124 | 1082.2496 | 1098.496  |
| 1113.7163 | 1145.0007 | 1150.7047 | 1158.907  | 1166.8049 | 1171.3924 |
| 1180.656  | 1191.6809 | 1209.9596 | 1234.1972 | 1236.485  | 1245.3273 |
| 1250.1859 | 1284.9567 | 1293.9562 | 1306.073  | 1319.8251 | 1329.8425 |
| 1338.3754 | 1371.0499 | 1383.6501 | 1389.105  | 1401.1739 | 1402.8622 |
| 1424.3826 | 1442.0543 | 1453.898  | 1466.119  | 1469.6505 | 1487.7978 |
| 1498.4614 | 1501.9524 | 1505.8646 | 1510.3233 | 1529.5767 | 1540.7771 |
| 1555.2029 | 1582.0619 | 1610.3487 | 1641.9542 | 1654.6302 | 1692.7052 |
| 1704.2635 | 1742.0905 | 1753.6373 | 1773.4402 | 3063.9365 | 3070.6388 |
| 3084.6544 | 3089.5981 | 3133.2011 | 3135.2197 | 3179.1613 | 3185.8814 |
| 3197.324  | 3207.1326 | 3208.0404 | 3220.8982 | 3248.7534 | 3248.9383 |
| 3249.4819 | 3260.5027 | 3260.9206 | 3263.8577 | 3659.291  | 3715.6336 |

|                                              |                             |
|----------------------------------------------|-----------------------------|
| E(RM062X)=                                   | -4250.77449                 |
| Zero-point correction=                       | 0.386116 (Hartree/Particle) |
| Thermal correction to Energy=                | 0.414546                    |
| Thermal correction to Enthalpy=              | 0.41549                     |
| Thermal correction to Gibbs Free Energy=     | 0.324986                    |
| Sum of electronic and zero-point Energies=   | -4250.388374                |
| Sum of electronic and thermal Energies=      | -4250.359944                |
| Sum of electronic and thermal Enthalpies=    | -4250.359                   |
| Sum of electronic and thermal Free Energies= | -4250.449504                |

## 2-Br

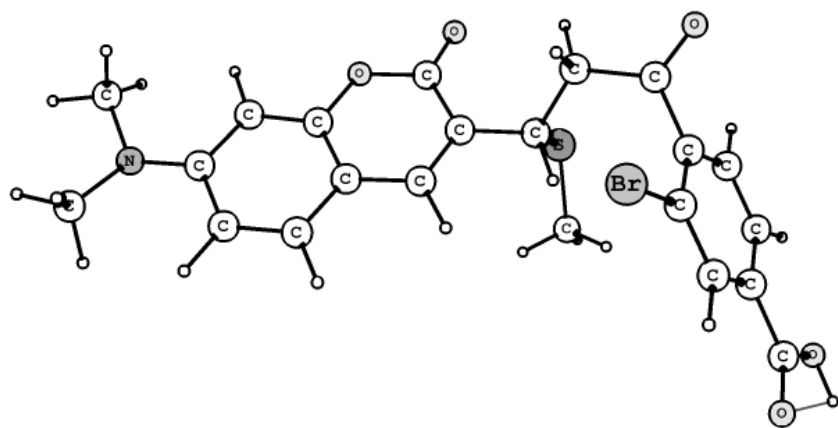

|    |              |              |              |
|----|--------------|--------------|--------------|
| 8  | 0.962777000  | 0.554080000  | 1.291212000  |
| 6  | 2.122836000  | 0.420320000  | 0.932575000  |
| 6  | 2.738810000  | -0.829052000 | 0.509913000  |
| 6  | 1.910884000  | -2.081439000 | 0.541657000  |
| 16 | 1.449444000  | -2.563721000 | 2.262444000  |
| 6  | 2.804481000  | -3.730967000 | 2.564899000  |
| 6  | 0.652485000  | -2.023004000 | -0.329075000 |
| 6  | -0.044104000 | -3.359396000 | -0.511960000 |
| 6  | 0.710499000  | -4.654866000 | -0.343730000 |
| 6  | 1.852860000  | -5.003019000 | -1.067293000 |
| 6  | 2.511934000  | -6.204024000 | -0.846351000 |
| 6  | 2.035575000  | -7.067139000 | 0.139771000  |
| 6  | 0.894530000  | -6.742626000 | 0.876572000  |
| 6  | 0.238983000  | -5.543235000 | 0.627534000  |
| 8  | -1.238978000 | -3.406747000 | -0.747498000 |
| 6  | 4.048869000  | -0.832345000 | 0.147103000  |
| 6  | 4.836148000  | 0.360760000  | 0.170171000  |
| 6  | 6.194345000  | 0.437465000  | -0.192996000 |
| 6  | 6.885768000  | 1.627823000  | -0.137849000 |
| 6  | 6.248326000  | 2.826982000  | 0.296163000  |
| 7  | 6.951371000  | 4.004242000  | 0.393672000  |
| 6  | 6.198338000  | 5.243095000  | 0.544388000  |
| 6  | 8.220672000  | 4.109585000  | -0.320049000 |
| 6  | 4.881944000  | 2.766263000  | 0.638431000  |
| 6  | 4.221867000  | 1.550850000  | 0.576319000  |
| 8  | 2.894957000  | 1.550077000  | 0.935516000  |
| 1  | 2.560704000  | -2.888349000 | 0.191570000  |
| 1  | 2.704456000  | -4.100641000 | 3.588239000  |
| 1  | 3.772298000  | -3.232034000 | 2.460835000  |
| 1  | 2.744818000  | -4.575947000 | 1.870256000  |
| 1  | 0.901987000  | -1.630252000 | -1.323819000 |
| 1  | -0.091190000 | -1.342666000 | 0.095377000  |
| 1  | 3.382867000  | -6.478742000 | -1.432395000 |
| 1  | 0.517598000  | -7.419810000 | 1.634911000  |
| 1  | -0.646178000 | -5.277106000 | 1.197737000  |
| 1  | 4.525955000  | -1.761021000 | -0.164119000 |
| 1  | 6.699470000  | -0.466499000 | -0.524067000 |
| 1  | 7.928671000  | 1.639296000  | -0.428656000 |
| 1  | 5.606997000  | 5.227386000  | 1.463185000  |
| 1  | 5.524803000  | 5.422576000  | -0.305885000 |
| 1  | 6.902041000  | 6.072059000  | 0.618340000  |
| 1  | 8.101844000  | 3.940798000  | -1.399198000 |



|    |             |              |              |
|----|-------------|--------------|--------------|
| 1  | 8.947755000 | 3.394825000  | 0.071940000  |
| 1  | 8.624077000 | 5.109915000  | -0.164072000 |
| 1  | 4.322531000 | 3.638497000  | 0.952580000  |
| 6  | 2.772294000 | -8.344579000 | 0.356198000  |
| 8  | 3.759094000 | -8.671981000 | -0.275940000 |
| 8  | 2.238032000 | -9.102792000 | 1.316848000  |
| 1  | 2.756362000 | -9.926921000 | 1.399070000  |
| 35 | 2.434721000 | -3.913889000 | -2.507661000 |

Frequencies

|           |           |           |           |           |           |
|-----------|-----------|-----------|-----------|-----------|-----------|
| 20.0944   | 23.6291   | 37.6949   | 44.5861   | 59.3957   | 60.1826   |
| 64.971    | 78.2306   | 91.8966   | 103.1792  | 109.934   | 118.2689  |
| 130.4389  | 142.8574  | 145.089   | 170.7941  | 171.8029  | 177.0518  |
| 205.0684  | 213.5274  | 225.5964  | 240.1425  | 253.8328  | 257.6957  |
| 274.3915  | 281.8617  | 294.3353  | 297.5018  | 335.0514  | 346.1663  |
| 361.194   | 399.9946  | 410.5077  | 435.2787  | 443.1772  | 466.9511  |
| 474.1782  | 481.3105  | 493.9861  | 504.9373  | 520.5605  | 536.994   |
| 552.7994  | 582.0795  | 608.418   | 620.8668  | 631.4985  | 640.5399  |
| 657.9498  | 685.9977  | 695.7917  | 704.7232  | 717.7364  | 726.0285  |
| 749.3666  | 756.7278  | 773.1559  | 791.3256  | 796.6867  | 816.1098  |
| 825.2639  | 854.6155  | 866.8156  | 891.1889  | 893.5895  | 951.3263  |
| 957.1361  | 968.8054  | 971.2642  | 989.1057  | 996.5342  | 1010.8027 |
| 1019.0369 | 1025.7203 | 1039.7045 | 1091.8942 | 1095.9197 | 1118.3771 |
| 1120.7346 | 1146.5251 | 1148.7357 | 1162.3499 | 1181.0953 | 1183.196  |
| 1190.2754 | 1198.4538 | 1219.1842 | 1227.6006 | 1236.283  | 1277.4373 |
| 1285.1389 | 1291.0324 | 1298.8152 | 1312.4207 | 1321.4476 | 1335.8367 |
| 1349.3875 | 1385.0281 | 1387.3454 | 1393.0127 | 1397.6546 | 1418.8752 |
| 1447.4483 | 1450.5272 | 1460.4415 | 1463.4589 | 1474.1871 | 1482.5058 |
| 1493.8595 | 1501.0829 | 1505.2339 | 1509.7751 | 1530.0822 | 1540.8857 |
| 1551.6934 | 1577.6881 | 1613.5064 | 1647.1284 | 1661.5832 | 1699.0422 |
| 1701.3768 | 1744.0588 | 1775.7202 | 1784.9233 | 3057.9042 | 3067.8308 |
| 3077.242  | 3093.2509 | 3143.1303 | 3149.7991 | 3157.0009 | 3162.1275 |
| 3164.0663 | 3183.5532 | 3197.2146 | 3206.1357 | 3207.9501 | 3221.8967 |
| 3251.2757 | 3264.7645 | 3266.0904 | 3275.0174 | 3282.0207 | 3702.4443 |

|                                              |                             |
|----------------------------------------------|-----------------------------|
| E(RM062X)=                                   | -4250.79425                 |
| Zero-point correction=                       | 0.386819 (Hartree/Particle) |
| Thermal correction to Energy=                | 0.415015                    |
| Thermal correction to Enthalpy=              | 0.415959                    |
| Thermal correction to Gibbs Free Energy=     | 0.326107                    |
| Sum of electronic and zero-point Energies=   | -4250.407431                |
| Sum of electronic and thermal Energies=      | -4250.379235                |
| Sum of electronic and thermal Enthalpies=    | -4250.378291                |
| Sum of electronic and thermal Free Energies= | -4250.468143                |

1-F

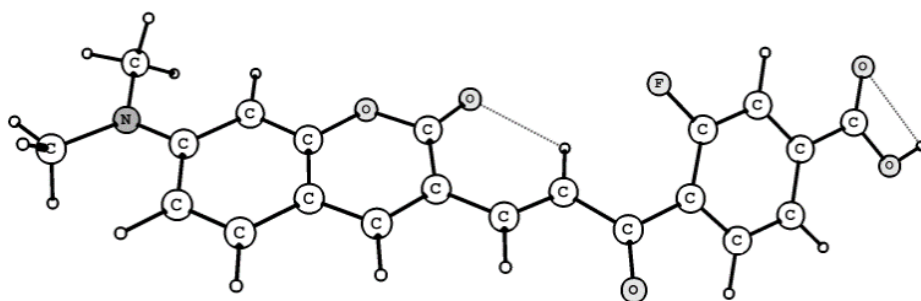

|   |              |              |              |
|---|--------------|--------------|--------------|
| 6 | -0.484024000 | -5.029083000 | -2.756953000 |
| 6 | -0.934061000 | -5.483862000 | -1.474471000 |
| 6 | -0.972460000 | -4.630555000 | -0.401579000 |
| 6 | -0.574769000 | -3.277919000 | -0.521432000 |
| 6 | -0.145400000 | -2.847383000 | -1.790597000 |
| 6 | -0.093496000 | -3.674167000 | -2.892818000 |
| 6 | -0.577010000 | -2.342522000 | 0.533677000  |
| 6 | -0.172814000 | -1.036689000 | 0.359608000  |
| 6 | 0.256695000  | -0.610224000 | -0.964826000 |
| 8 | 0.244375000  | -1.545279000 | -1.970918000 |
| 7 | -0.428507000 | -5.877120000 | -3.810903000 |
| 8 | 0.629373000  | 0.506628000  | -1.284288000 |
| 6 | -0.191385000 | -0.127853000 | 1.484527000  |
| 6 | 0.155912000  | 1.178675000  | 1.529612000  |
| 6 | 0.066442000  | 1.903558000  | 2.801633000  |
| 6 | 0.354938000  | 3.377934000  | 2.806755000  |
| 6 | -0.922366000 | -7.243072000 | -3.683193000 |
| 6 | -0.043857000 | -5.377738000 | -5.124002000 |
| 6 | 0.979820000  | 3.934571000  | 3.929086000  |
| 6 | 1.274805000  | 5.290311000  | 3.991568000  |
| 6 | 0.927285000  | 6.119770000  | 2.921139000  |
| 6 | 0.288757000  | 5.597171000  | 1.797126000  |
| 6 | 0.020634000  | 4.241459000  | 1.763426000  |
| 8 | -0.188783000 | 1.356918000  | 3.876114000  |
| 6 | 1.214842000  | 7.582335000  | 2.936991000  |
| 8 | 0.941620000  | 8.335618000  | 2.020967000  |
| 8 | 1.806691000  | 7.993096000  | 4.062168000  |
| 1 | -1.248108000 | -6.512111000 | -1.344096000 |
| 1 | -1.314025000 | -4.988850000 | 0.565994000  |
| 1 | 0.247082000  | -3.264001000 | -3.835323000 |
| 1 | -0.906358000 | -2.666899000 | 1.519602000  |
| 1 | -0.543604000 | -0.581924000 | 2.410955000  |
| 1 | 0.506142000  | 1.714075000  | 0.658201000  |
| 1 | -1.984348000 | -7.261641000 | -3.412216000 |
| 1 | -0.800653000 | -7.748366000 | -4.639953000 |
| 1 | -0.356770000 | -7.797604000 | -2.927458000 |
| 1 | -0.745546000 | -4.614807000 | -5.482753000 |
| 1 | 0.962067000  | -4.946099000 | -5.097419000 |
| 1 | -0.040629000 | -6.206983000 | -5.829756000 |
| 1 | 1.245743000  | 3.280263000  | 4.753519000  |
| 1 | 1.771252000  | 5.698589000  | 4.864579000  |
| 1 | -0.002796000 | 6.228082000  | 0.963810000  |
| 1 | 1.969665000  | 8.954831000  | 4.003735000  |
| 9 | -0.625991000 | 3.760976000  | 0.680978000  |

Frequencies

|           |           |           |           |           |           |
|-----------|-----------|-----------|-----------|-----------|-----------|
| 17.1917   | 26.6554   | 33.239    | 41.1345   | 45.917    | 78.4142   |
| 93.5219   | 99.2807   | 111.2135  | 121.1145  | 142.9133  | 155.3004  |
| 161.8803  | 178.484   | 193.022   | 201.2631  | 215.7213  | 237.3398  |
| 258.9432  | 277.9362  | 283.8766  | 301.9666  | 311.4648  | 330.1759  |
| 366.6333  | 383.1252  | 390.2165  | 433.6971  | 438.9254  | 462.91    |
| 471.2487  | 473.0376  | 486.1052  | 506.0925  | 533.7351  | 538.0267  |
| 551.988   | 569.2381  | 593.986   | 616.0354  | 631.4701  | 655.2734  |
| 662.3457  | 695.0455  | 702.7611  | 723.5896  | 732.7697  | 748.0166  |
| 759.2432  | 779.6601  | 796.0451  | 810.2331  | 821.9063  | 850.1921  |
| 864.9831  | 873.8392  | 894.7179  | 899.7094  | 931.2734  | 952.9892  |
| 957.9858  | 978.4479  | 1001.9374 | 1007.1214 | 1013.4578 | 1026.4829 |
| 1071.1196 | 1100.5446 | 1107.4787 | 1127.1655 | 1153.5458 | 1160.3945 |
| 1166.2254 | 1176.2798 | 1194.1893 | 1196.6199 | 1223.611  | 1235.7616 |
| 1245.3575 | 1271.7159 | 1284.9788 | 1287.1759 | 1315.2671 | 1326.0785 |
| 1346.7684 | 1365.9034 | 1374.7989 | 1398.6377 | 1405.4453 | 1422.8724 |
| 1446.9182 | 1468.69   | 1479.5428 | 1495.5262 | 1502.7478 | 1505.1103 |
| 1510.3227 | 1526.6168 | 1540.5777 | 1553.5216 | 1565.8929 | 1602.678  |
| 1611.0216 | 1646.9889 | 1662.4716 | 1682.5608 | 1713.366  | 1727.3158 |
| 1758.7538 | 1771.1947 | 3074.8266 | 3084.8295 | 3140.0707 | 3146.5294 |
| 3200.3134 | 3205.8561 | 3216.004  | 3217.6803 | 3232.9445 | 3239.7015 |
| 3255.2727 | 3255.83   | 3257.5015 | 3275.2929 | 3288.1233 | 3702.2073 |

|                                              |                             |
|----------------------------------------------|-----------------------------|
| E(RM062X)=                                   | -1340.13151                 |
| Zero-point correction=                       | 0.334953 (Hartree/Particle) |
| Thermal correction to Energy=                | 0.359254                    |
| Thermal correction to Enthalpy=              | 0.360198                    |
| Thermal correction to Gibbs Free Energy=     | 0.278846                    |
| Sum of electronic and zero-point Energies=   | -1339.796557                |
| Sum of electronic and thermal Energies=      | -1339.772256                |
| Sum of electronic and thermal Enthalpies=    | -1339.771312                |
| Sum of electronic and thermal Free Energies= | -1339.852664                |

## 2-F-a

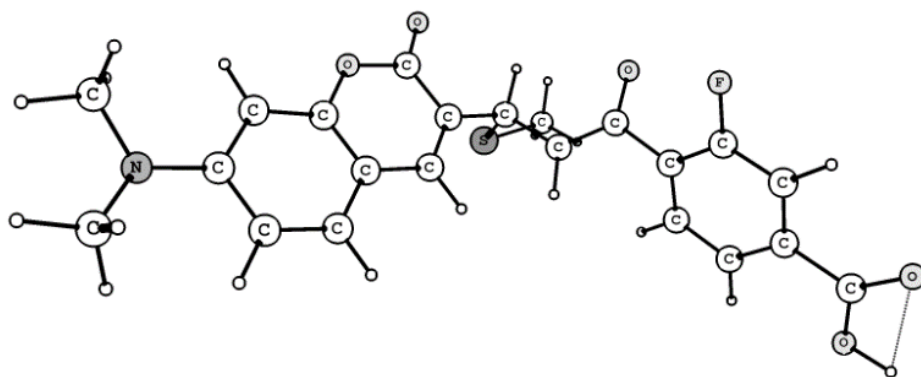

|    |              |              |              |
|----|--------------|--------------|--------------|
| 6  | 0.413541000  | -3.967956000 | -2.698245000 |
| 6  | 1.659865000  | -3.455733000 | -2.235414000 |
| 6  | 1.727065000  | -2.253929000 | -1.564273000 |
| 6  | 0.570621000  | -1.497169000 | -1.298871000 |
| 6  | -0.647128000 | -2.027975000 | -1.734528000 |
| 6  | -0.753410000 | -3.230862000 | -2.414718000 |
| 6  | 0.560250000  | -0.236151000 | -0.623254000 |
| 6  | -0.592783000 | 0.446444000  | -0.397103000 |
| 6  | -1.853402000 | -0.144447000 | -0.832014000 |
| 8  | -1.815551000 | -1.351023000 | -1.481784000 |
| 7  | 0.355229000  | -5.139090000 | -3.424313000 |
| 8  | -2.964451000 | 0.334300000  | -0.657745000 |
| 6  | -0.664864000 | 1.800427000  | 0.263943000  |
| 6  | 0.488999000  | 2.150567000  | 1.135435000  |
| 6  | 0.333660000  | 2.703232000  | 2.378085000  |
| 6  | 1.579961000  | 3.140612000  | 3.110771000  |
| 8  | -0.792551000 | 2.948064000  | 2.985786000  |
| 6  | 1.546382000  | 4.321933000  | 3.867674000  |
| 6  | 2.660342000  | 4.791113000  | 4.550999000  |
| 6  | 3.853656000  | 4.063923000  | 4.516046000  |
| 6  | 3.917493000  | 2.868333000  | 3.797801000  |
| 6  | 2.790828000  | 2.443089000  | 3.117112000  |
| 16 | -0.863118000 | 3.035947000  | -1.127714000 |
| 6  | -1.260161000 | 4.500358000  | -0.138010000 |
| 6  | 1.481999000  | -6.063301000 | -3.327476000 |
| 6  | -0.949591000 | -5.770555000 | -3.583763000 |
| 6  | 5.032444000  | 4.580536000  | 5.254429000  |
| 8  | 6.102011000  | 3.776899000  | 5.182657000  |
| 8  | 5.046412000  | 5.631369000  | 5.872220000  |
| 1  | 2.575926000  | -4.004668000 | -2.412727000 |
| 1  | 2.688418000  | -1.875643000 | -1.226204000 |
| 1  | -1.738584000 | -3.567157000 | -2.712642000 |
| 1  | 1.512777000  | 0.168818000  | -0.288736000 |
| 1  | -1.597145000 | 1.860234000  | 0.834205000  |
| 1  | 1.487664000  | 2.061280000  | 0.720253000  |
| 1  | 0.616514000  | 4.881460000  | 3.902474000  |
| 1  | 2.609786000  | 5.717551000  | 5.114091000  |
| 1  | 4.818588000  | 2.265403000  | 3.765098000  |
| 9  | 2.897436000  | 1.266735000  | 2.452215000  |
| 1  | -1.336429000 | 5.351145000  | -0.819974000 |
| 1  | -2.214075000 | 4.374521000  | 0.381273000  |
| 1  | -0.465371000 | 4.696121000  | 0.588128000  |
| 1  | 2.401430000  | -5.602048000 | -3.692816000 |
| 1  | 1.642560000  | -6.410443000 | -2.296893000 |

|   |              |              |              |
|---|--------------|--------------|--------------|
| 1 | 1.274891000  | -6.926385000 | -3.960379000 |
| 1 | -1.631486000 | -5.118615000 | -4.134782000 |
| 1 | -0.824551000 | -6.685692000 | -4.162802000 |
| 1 | -1.405279000 | -6.024576000 | -2.615696000 |
| 1 | 6.835449000  | 4.179313000  | 5.686643000  |

Frequencies

|           |           |           |           |           |           |
|-----------|-----------|-----------|-----------|-----------|-----------|
| 20.2367   | 25.0232   | 29.2116   | 38.5947   | 45.1166   | 53.656    |
| 61.3057   | 80.6276   | 96.1484   | 104.5585  | 112.8819  | 117.6311  |
| 129.2494  | 147.3289  | 161.363   | 176.1869  | 188.1839  | 198.9025  |
| 203.9757  | 208.4966  | 228.9318  | 241.5509  | 249.0675  | 265.0254  |
| 275.8026  | 294.0048  | 337.8889  | 350.6288  | 360.9007  | 387.9353  |
| 393.1804  | 405.2307  | 434.5343  | 439.425   | 468.914   | 476.3093  |
| 483.4827  | 488.3202  | 498.2126  | 532.015   | 545.9273  | 564.9864  |
| 582.5703  | 602.2036  | 639.7139  | 642.168   | 651.059   | 657.8496  |
| 668.904   | 688.7811  | 704.9428  | 726.1761  | 739.6257  | 744.3394  |
| 754.2315  | 761.0083  | 787.3329  | 793.725   | 807.9103  | 812.3663  |
| 830.0755  | 856.6018  | 860.1619  | 879.1936  | 918.5746  | 930.0257  |
| 952.5486  | 962.5716  | 966.3965  | 992.1288  | 996.6521  | 1001.8417 |
| 1010.0807 | 1013.3396 | 1051.7681 | 1094.3999 | 1101.3472 | 1124.7408 |
| 1136.1588 | 1139.5269 | 1160.7966 | 1181.2617 | 1184.4369 | 1186.2853 |
| 1192.392  | 1208.8695 | 1212.7221 | 1235.4992 | 1249.325  | 1264.1943 |
| 1284.16   | 1288.6929 | 1294.3829 | 1309.9945 | 1341.0502 | 1360.9818 |
| 1375.712  | 1384.4886 | 1395.3    | 1406.8512 | 1421.4598 | 1443.1682 |
| 1461.9536 | 1468.2517 | 1470.2184 | 1489.6026 | 1489.9389 | 1499.8338 |
| 1505.2363 | 1510.8423 | 1522.5283 | 1535.7135 | 1555.3698 | 1573.601  |
| 1617.8897 | 1625.5406 | 1654.9667 | 1663.6908 | 1701.2386 | 1704.9682 |
| 1743.3972 | 1759.2983 | 3057.0964 | 3062.3515 | 3082.2258 | 3130.0067 |
| 3150.8261 | 3159.6934 | 3171.3771 | 3180.5373 | 3192.9616 | 3204.4003 |
| 3226.5497 | 3232.6482 | 3232.7663 | 3239.1819 | 3246.5749 | 3262.6458 |

|                                              |                             |
|----------------------------------------------|-----------------------------|
| E(RM062X)=                                   | -1778.31505                 |
| Zero-point correction=                       | 0.374812 (Hartree/Particle) |
| Thermal correction to Energy=                | 0.40246                     |
| Thermal correction to Enthalpy=              | 0.403404                    |
| Thermal correction to Gibbs Free Energy=     | 0.314276                    |
| Sum of electronic and zero-point Energies=   | -1777.940238                |
| Sum of electronic and thermal Energies=      | -1777.91259                 |
| Sum of electronic and thermal Enthalpies=    | -1777.911646                |
| Sum of electronic and thermal Free Energies= | -1778.000774                |

## 2-F-b

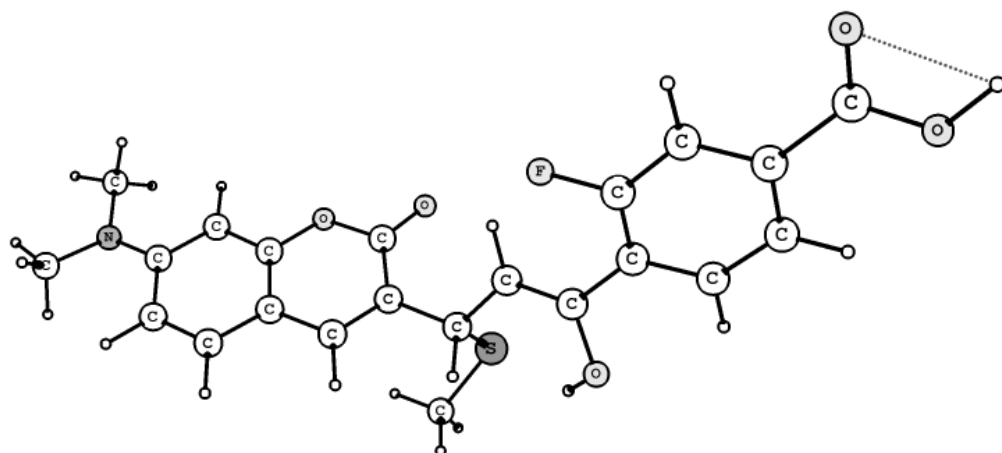

|    |              |              |              |
|----|--------------|--------------|--------------|
| 8  | 1.631349000  | 0.190282000  | 2.100507000  |
| 6  | 2.557118000  | 0.109427000  | 1.306988000  |
| 6  | 2.816479000  | -1.003398000 | 0.407519000  |
| 6  | 1.934022000  | -2.214652000 | 0.469766000  |
| 16 | 2.189131000  | -3.150408000 | 2.056685000  |
| 6  | 3.889680000  | -3.715582000 | 1.777875000  |
| 6  | 0.469679000  | -1.940380000 | 0.268270000  |
| 6  | -0.404459000 | -2.923908000 | -0.004508000 |
| 8  | -0.039193000 | -4.248555000 | -0.043958000 |
| 6  | -1.845930000 | -2.748808000 | -0.282317000 |
| 6  | -2.741938000 | -3.791830000 | -0.004848000 |
| 6  | -4.101915000 | -3.671161000 | -0.261190000 |
| 6  | -4.599555000 | -2.492062000 | -0.820615000 |
| 6  | -6.045386000 | -2.313841000 | -1.117705000 |
| 8  | -6.789278000 | -3.374318000 | -0.783975000 |
| 8  | -6.520579000 | -1.308804000 | -1.615410000 |
| 6  | -3.732852000 | -1.440632000 | -1.122514000 |
| 6  | -2.387885000 | -1.590103000 | -0.848797000 |
| 6  | 3.894837000  | -0.947935000 | -0.420788000 |
| 6  | 4.776311000  | 0.172396000  | -0.433492000 |
| 6  | 5.904448000  | 0.292943000  | -1.268503000 |
| 6  | 6.729576000  | 1.391748000  | -1.202904000 |
| 6  | 6.474745000  | 2.443208000  | -0.270179000 |
| 7  | 7.328114000  | 3.500179000  | -0.165198000 |
| 6  | 6.999362000  | 4.604891000  | 0.721490000  |
| 6  | 8.399290000  | 3.668472000  | -1.136120000 |
| 6  | 5.328465000  | 2.347447000  | 0.551144000  |
| 6  | 4.520846000  | 1.227911000  | 0.451918000  |
| 8  | 3.422194000  | 1.173959000  | 1.276462000  |
| 1  | 2.275436000  | -2.902653000 | -0.314853000 |
| 1  | 4.151039000  | -4.376575000 | 2.607820000  |
| 1  | 4.583601000  | -2.871179000 | 1.765943000  |
| 1  | 3.963209000  | -4.273691000 | 0.840599000  |
| 1  | 0.114724000  | -0.920753000 | 0.343973000  |
| 1  | 0.767604000  | -4.383393000 | 0.491312000  |
| 1  | -2.355764000 | -4.708835000 | 0.425984000  |
| 1  | -4.769512000 | -4.492697000 | -0.026700000 |
| 1  | -7.722057000 | -3.188885000 | -1.006175000 |
| 1  | -4.092224000 | -0.519608000 | -1.570227000 |
| 9  | -1.573793000 | -0.563369000 | -1.175206000 |
| 1  | 4.103030000  | -1.781868000 | -1.090046000 |

|   |             |              |              |
|---|-------------|--------------|--------------|
| 1 | 6.119604000 | -0.505492000 | -1.974268000 |
| 1 | 7.586673000 | 1.446158000  | -1.862663000 |
| 1 | 6.074824000 | 5.112823000  | 0.415821000  |
| 1 | 7.815524000 | 5.326307000  | 0.702605000  |
| 1 | 6.879128000 | 4.253537000  | 1.751348000  |
| 1 | 9.090190000 | 2.819726000  | -1.113427000 |
| 1 | 8.962095000 | 4.566058000  | -0.882855000 |
| 1 | 8.009471000 | 3.777524000  | -2.156309000 |
| 1 | 5.061985000 | 3.119472000  | 1.262756000  |

Frequencies

|           |           |           |           |           |           |
|-----------|-----------|-----------|-----------|-----------|-----------|
| 16.954    | 23.3987   | 28.9287   | 45.7229   | 50.2557   | 59.9541   |
| 66.9963   | 75.9448   | 93.7167   | 115.4528  | 122.6931  | 129.2129  |
| 144.9471  | 155.5231  | 163.6964  | 172.8874  | 183.5712  | 196.192   |
| 202.4067  | 211.2805  | 219.1802  | 237.5176  | 258.386   | 264.8681  |
| 276.9831  | 291.4333  | 319.3317  | 329.854   | 343.1828  | 374.935   |
| 386.0988  | 399.4907  | 406.2627  | 437.4212  | 457.2173  | 469.1287  |
| 473.1411  | 480.9495  | 499.6786  | 519.8179  | 537.8258  | 544.287   |
| 549.3751  | 576.2671  | 586.3029  | 616.1331  | 628.8968  | 649.9147  |
| 656.3724  | 660.2572  | 699.4377  | 709.8503  | 724.5288  | 737.135   |
| 742.7247  | 748.3458  | 759.0153  | 786.3804  | 802.0303  | 807.4683  |
| 816.8516  | 835.4556  | 837.8732  | 843.7955  | 879.8229  | 899.8174  |
| 923.724   | 953.484   | 956.4643  | 961.2153  | 987.7118  | 1001.2713 |
| 1010.6296 | 1011.8104 | 1015.5669 | 1037.4894 | 1103.2902 | 1108.6968 |
| 1122.8457 | 1143.5319 | 1157.3819 | 1162.8103 | 1165.561  | 1178.5465 |
| 1189.8805 | 1192.2642 | 1233.5869 | 1235.5924 | 1237.5926 | 1242.9954 |
| 1269.7657 | 1283.4847 | 1284.4704 | 1305.8284 | 1319.2411 | 1327.0151 |
| 1358.4384 | 1374.9076 | 1383.6081 | 1391.2657 | 1398.2001 | 1403.9547 |
| 1424.3177 | 1453.8464 | 1468.898  | 1470.5596 | 1481.3921 | 1489.0937 |
| 1496.6916 | 1502.3211 | 1505.1423 | 1509.4403 | 1530.3757 | 1542.6596 |
| 1563.7798 | 1583.1789 | 1611.192  | 1654.7401 | 1656.8328 | 1701.8481 |
| 1711.0535 | 1733.7209 | 1743.2554 | 1766.3834 | 3063.0847 | 3071.2628 |
| 3086.6515 | 3095.6437 | 3132.2623 | 3136.027  | 3180.1821 | 3187.4133 |
| 3200.8589 | 3210.1065 | 3211.6158 | 3221.0166 | 3249.8303 | 3251.5966 |
| 3255.5418 | 3265.9597 | 3266.3024 | 3270.2253 | 3629.5271 | 3726.3289 |

|                                              |                             |
|----------------------------------------------|-----------------------------|
| E(RM062X)=                                   | -1778.78002                 |
| Zero-point correction=                       | 0.387487 (Hartree/Particle) |
| Thermal correction to Energy=                | 0.415437                    |
| Thermal correction to Enthalpy=              | 0.416381                    |
| Thermal correction to Gibbs Free Energy=     | 0.327125                    |
| Sum of electronic and zero-point Energies=   | -1778.392533                |
| Sum of electronic and thermal Energies=      | -1778.364583                |
| Sum of electronic and thermal Enthalpies=    | -1778.363639                |
| Sum of electronic and thermal Free Energies= | -1778.452895                |

2-F

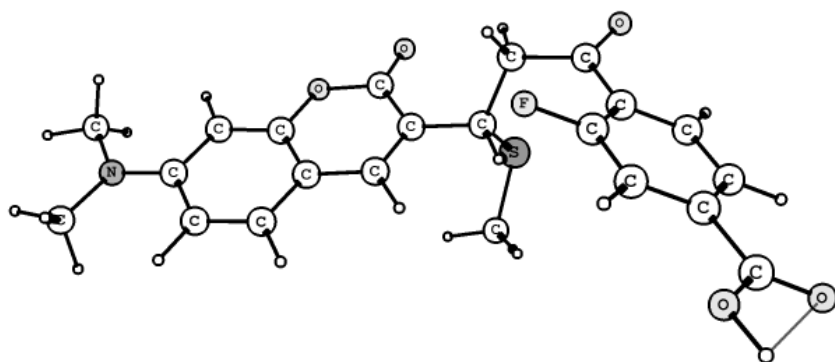

|    |              |              |              |
|----|--------------|--------------|--------------|
| 8  | 0.792658000  | 0.734545000  | 1.108301000  |
| 6  | 1.962586000  | 0.475244000  | 0.867730000  |
| 6  | 2.539182000  | -0.853752000 | 0.743476000  |
| 6  | 1.667924000  | -2.061909000 | 0.939487000  |
| 16 | 1.156366000  | -2.284607000 | 2.693578000  |
| 6  | 2.766146000  | -2.749811000 | 3.384113000  |
| 6  | 0.407404000  | -2.079512000 | 0.062526000  |
| 6  | -0.297726000 | -3.416583000 | 0.084290000  |
| 6  | 0.468070000  | -4.688945000 | -0.146984000 |
| 6  | 1.596005000  | -4.791008000 | -0.960422000 |
| 6  | 2.278289000  | -5.978653000 | -1.156197000 |
| 6  | 1.816299000  | -7.119771000 | -0.501243000 |
| 6  | 2.514716000  | -8.428142000 | -0.658364000 |
| 8  | 3.585010000  | -8.363720000 | -1.454850000 |
| 8  | 2.151961000  | -9.455485000 | -0.117464000 |
| 6  | 0.687842000  | -7.061290000 | 0.320993000  |
| 6  | 0.020997000  | -5.855899000 | 0.486308000  |
| 8  | -1.495049000 | -3.488589000 | 0.314294000  |
| 6  | 3.871670000  | -0.973765000 | 0.488304000  |
| 6  | 4.714706000  | 0.164746000  | 0.323231000  |
| 6  | 6.095803000  | 0.110880000  | 0.047555000  |
| 6  | 6.843123000  | 1.256709000  | -0.103886000 |
| 6  | 6.237433000  | 2.545261000  | 0.015708000  |
| 7  | 6.973825000  | 3.679319000  | -0.128941000 |
| 6  | 6.331041000  | 4.977942000  | -0.014846000 |
| 6  | 8.394430000  | 3.599292000  | -0.434827000 |
| 6  | 4.851827000  | 2.611795000  | 0.288460000  |
| 6  | 4.137069000  | 1.436517000  | 0.434066000  |
| 8  | 2.794294000  | 1.554027000  | 0.701652000  |
| 1  | 2.286928000  | -2.933623000 | 0.703496000  |
| 1  | 2.617942000  | -2.956912000 | 4.446608000  |
| 1  | 3.487297000  | -1.934411000 | 3.281533000  |
| 1  | 3.147861000  | -3.649766000 | 2.894208000  |
| 1  | 0.688050000  | -1.848597000 | -0.972130000 |
| 1  | -0.314352000 | -1.329181000 | 0.390713000  |
| 1  | 3.146410000  | -5.996181000 | -1.805939000 |
| 1  | 3.997182000  | -9.247952000 | -1.509109000 |
| 1  | 0.340906000  | -7.955963000 | 0.827058000  |
| 1  | -0.853633000 | -5.797647000 | 1.126810000  |
| 1  | 4.314269000  | -1.965612000 | 0.401715000  |
| 1  | 6.571090000  | -0.862100000 | -0.048328000 |
| 1  | 7.901918000  | 1.171821000  | -0.315783000 |
| 1  | 5.865685000  | 5.105305000  | 0.969651000  |
| 1  | 5.560336000  | 5.112395000  | -0.783828000 |



|   |             |              |              |
|---|-------------|--------------|--------------|
| 1 | 7.082136000 | 5.756483000  | -0.140769000 |
| 1 | 8.572171000 | 3.084677000  | -1.386542000 |
| 1 | 8.944008000 | 3.074615000  | 0.355080000  |
| 1 | 8.792580000 | 4.610108000  | -0.514518000 |
| 1 | 4.329248000 | 3.555316000  | 0.388711000  |
| 9 | 2.052436000 | -3.698074000 | -1.607616000 |

Frequencies

|           |           |           |           |           |           |
|-----------|-----------|-----------|-----------|-----------|-----------|
| 17.8546   | 22.887    | 33.1747   | 46.5993   | 57.2627   | 58.2437   |
| 65.5072   | 82.6627   | 89.7142   | 100.6599  | 110.4143  | 118.1121  |
| 121.9646  | 135.6814  | 142.1909  | 181.6802  | 187.8037  | 192.2448  |
| 203.0952  | 214.6847  | 232.7143  | 242.9754  | 255.5673  | 273.0716  |
| 289.9715  | 303.0698  | 306.1383  | 328.129   | 351.3439  | 375.4619  |
| 401.8139  | 416.137   | 432.288   | 447.3443  | 453.3744  | 474.6761  |
| 479.229   | 483.4433  | 493.118   | 538.1781  | 539.445   | 547.4243  |
| 561.5229  | 608.7741  | 618.9636  | 625.9207  | 632.5548  | 656.8091  |
| 662.6682  | 695.9457  | 702.6092  | 723.4675  | 730.6719  | 747.8059  |
| 753.7189  | 764.6913  | 769.449   | 787.5709  | 799.6966  | 816.6884  |
| 833.2698  | 850.1733  | 875.9656  | 892.0407  | 928.9874  | 952.0238  |
| 961.158   | 966.1408  | 980.299   | 995.6451  | 1002.3653 | 1007.9708 |
| 1011.1983 | 1017.0534 | 1062.8768 | 1091.8615 | 1102.7787 | 1116.7336 |
| 1127.9767 | 1148.6032 | 1162.0308 | 1166.9862 | 1171.483  | 1185.5706 |
| 1193.8826 | 1194.7208 | 1234.9813 | 1237.2033 | 1259.4833 | 1273.9691 |
| 1288.7609 | 1292.3319 | 1299.0852 | 1319.1328 | 1328.5993 | 1336.0298 |
| 1364.5606 | 1376.4024 | 1388.4604 | 1406.6555 | 1409.1152 | 1427.6268 |
| 1457.6305 | 1469.0883 | 1470.3984 | 1476.5959 | 1477.395  | 1488.7388 |
| 1498.0724 | 1501.2236 | 1507.727  | 1509.5179 | 1529.7399 | 1538.5141 |
| 1555.7851 | 1582.7336 | 1611.0918 | 1656.5524 | 1658.7036 | 1700.2439 |
| 1714.34   | 1747.6147 | 1766.3889 | 1776.4619 | 3069.5552 | 3075.8654 |
| 3084.4602 | 3110.1711 | 3125.0462 | 3129.4061 | 3132.8451 | 3173.1159 |
| 3178.1147 | 3189.7468 | 3200.5229 | 3216.551  | 3217.0945 | 3231.6509 |
| 3246.8641 | 3257.0945 | 3261.0299 | 3261.4843 | 3269.1825 | 3706.6957 |

|                                              |                            |
|----------------------------------------------|----------------------------|
| E(RM062X)=                                   | -1778.79645                |
| Zero-point correction=                       | 0.38861 (Hartree/Particle) |
| Thermal correction to Energy=                | 0.416362                   |
| Thermal correction to Enthalpy=              | 0.417307                   |
| Thermal correction to Gibbs Free Energy=     | 0.328343                   |
| Sum of electronic and zero-point Energies=   | -1778.40784                |
| Sum of electronic and thermal Energies=      | -1778.380088               |
| Sum of electronic and thermal Enthalpies=    | -1778.379143               |
| Sum of electronic and thermal Free Energies= | -1778.468107               |

1-NO<sub>2</sub>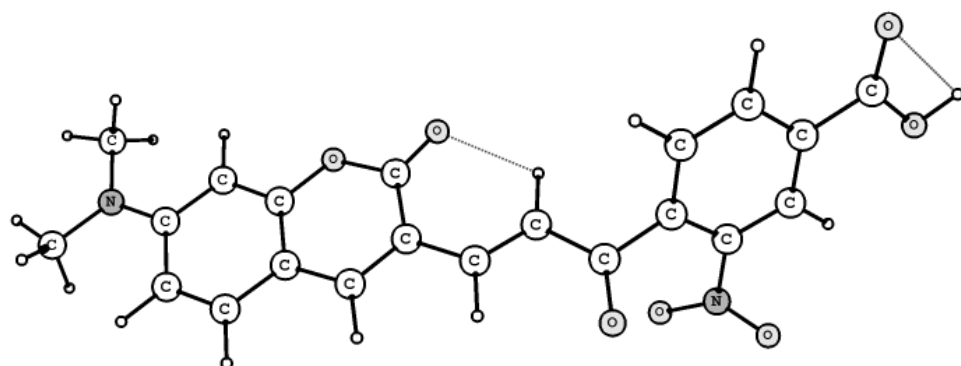

|   |              |              |              |
|---|--------------|--------------|--------------|
| 6 | -0.462096000 | -4.988646000 | -2.696763000 |
| 6 | -1.144380000 | -5.382225000 | -1.498388000 |
| 6 | -1.281736000 | -4.508645000 | -0.451456000 |
| 6 | -0.753871000 | -3.196742000 | -0.513241000 |
| 6 | -0.079082000 | -2.830838000 | -1.694314000 |
| 6 | 0.076670000  | -3.679396000 | -2.769327000 |
| 6 | -0.858546000 | -2.244172000 | 0.518125000  |
| 6 | -0.326275000 | -0.976616000 | 0.403930000  |
| 6 | 0.371235000  | -0.620050000 | -0.823499000 |
| 8 | 0.460840000  | -1.575528000 | -1.806705000 |
| 7 | -0.342260000 | -5.847075000 | -3.734150000 |
| 8 | 0.897396000  | 0.451450000  | -1.073608000 |
| 6 | -0.473822000 | -0.042878000 | 1.494297000  |
| 6 | -0.049567000 | 1.240280000  | 1.589067000  |
| 6 | -0.310958000 | 1.989110000  | 2.816134000  |
| 6 | 0.145279000  | 3.427684000  | 2.839434000  |
| 6 | -0.885626000 | -7.196804000 | -3.640982000 |
| 6 | 0.346414000  | -5.430519000 | -4.948219000 |
| 6 | 0.894136000  | 3.969407000  | 3.886537000  |
| 6 | 1.188772000  | 5.318289000  | 3.988251000  |
| 6 | 0.719219000  | 6.170044000  | 2.987935000  |
| 6 | -0.022779000 | 5.661371000  | 1.922268000  |
| 6 | -0.304529000 | 4.299650000  | 1.848976000  |
| 8 | -0.903950000 | 1.549092000  | 3.799716000  |
| 6 | 1.004871000  | 7.632845000  | 3.025719000  |
| 8 | 0.607375000  | 8.417204000  | 2.185740000  |
| 8 | 1.741176000  | 7.997823000  | 4.077666000  |
| 1 | -1.560812000 | -6.378285000 | -1.415051000 |
| 1 | -1.806167000 | -4.816211000 | 0.449567000  |
| 1 | 0.608296000  | -3.323399000 | -3.643234000 |
| 1 | -1.380605000 | -2.518588000 | 1.433562000  |
| 1 | -1.007591000 | -0.450593000 | 2.353415000  |
| 1 | 0.489112000  | 1.741159000  | 0.794789000  |
| 1 | -1.969034000 | -7.177960000 | -3.481111000 |
| 1 | -0.686271000 | -7.719249000 | -4.575236000 |
| 1 | -0.417664000 | -7.756259000 | -2.823580000 |
| 1 | -0.151388000 | -4.568837000 | -5.407124000 |
| 1 | 1.388884000  | -5.164399000 | -4.739321000 |
| 1 | 0.336159000  | -6.254850000 | -5.659563000 |
| 1 | 1.788392000  | 5.686197000  | 4.813684000  |
| 1 | -0.382818000 | 6.333613000  | 1.150066000  |
| 1 | -0.899755000 | 3.912700000  | 1.026856000  |
| 1 | 1.895253000  | 8.962200000  | 4.043022000  |
| 7 | 1.467239000  | 3.082165000  | 4.904689000  |

|   |             |             |             |
|---|-------------|-------------|-------------|
| 8 | 1.812594000 | 1.964539000 | 4.558144000 |
| 8 | 1.591863000 | 3.518704000 | 6.037310000 |

Frequencies

|           |           |           |           |           |           |
|-----------|-----------|-----------|-----------|-----------|-----------|
| 18.6166   | 26.8195   | 27.6482   | 37.7628   | 55.5243   | 61.4863   |
| 65.5969   | 72.8321   | 105.5281  | 109.9501  | 116.0273  | 116.9636  |
| 138.1518  | 152.6322  | 160.3088  | 164.9213  | 191.7014  | 201.6264  |
| 206.8712  | 225.8607  | 255.0834  | 280.3579  | 298.8004  | 303.0032  |
| 310.2252  | 328.5821  | 363.8465  | 368.9072  | 393.5194  | 417.6558  |
| 425.6523  | 437.7364  | 461.4909  | 472.7835  | 474.6911  | 485.481   |
| 510.7358  | 535.9348  | 551.9787  | 563.6596  | 601.0818  | 615.1148  |
| 633.0439  | 654.6278  | 667.2898  | 693.1344  | 701.3703  | 711.166   |
| 724.213   | 733.2065  | 752.3521  | 775.751   | 794.257   | 798.3592  |
| 808.6241  | 820.5069  | 835.5683  | 846.9972  | 871.4811  | 884.2353  |
| 897.4055  | 902.4304  | 946.2049  | 952.6352  | 954.9025  | 984.3121  |
| 1006.2207 | 1007.5237 | 1019.0235 | 1034.4876 | 1060.6406 | 1100.6924 |
| 1104.7714 | 1130.6598 | 1146.539  | 1150.7564 | 1166.534  | 1173.2581 |
| 1183.1993 | 1198.9712 | 1220.2903 | 1226.6868 | 1246.2556 | 1257.6951 |
| 1288.0922 | 1299.2327 | 1313.3305 | 1326.9008 | 1339.2209 | 1366.1781 |
| 1375.837  | 1405.2417 | 1408.332  | 1424.125  | 1448.0446 | 1452.7553 |
| 1467.6507 | 1478.6706 | 1491.0661 | 1497.3526 | 1504.5462 | 1509.9831 |
| 1527.9744 | 1544.1476 | 1557.3431 | 1563.5327 | 1598.9985 | 1609.6916 |
| 1635.5002 | 1647.2725 | 1656.1623 | 1684.1251 | 1714.8866 | 1732.6056 |
| 1760.5058 | 1779.9361 | 3075.9311 | 3081.5418 | 3141.227  | 3143.1717 |
| 3200.9848 | 3204.9643 | 3214.5167 | 3215.5836 | 3227.356  | 3234.6894 |
| 3253.5633 | 3261.3995 | 3262.5914 | 3273.8436 | 3289.5034 | 3697.9371 |

|                                              |                             |
|----------------------------------------------|-----------------------------|
| E(RM062X)=                                   | -1445.35042                 |
| Zero-point correction=                       | 0.345551 (Hartree/Particle) |
| Thermal correction to Energy=                | 0.371763                    |
| Thermal correction to Enthalpy=              | 0.372708                    |
| Thermal correction to Gibbs Free Energy=     | 0.286438                    |
| Sum of electronic and zero-point Energies=   | -1445.004869                |
| Sum of electronic and thermal Energies=      | -1444.978657                |
| Sum of electronic and thermal Enthalpies=    | -1444.977712                |
| Sum of electronic and thermal Free Energies= | -1445.063982                |

2-NO<sub>2</sub>-a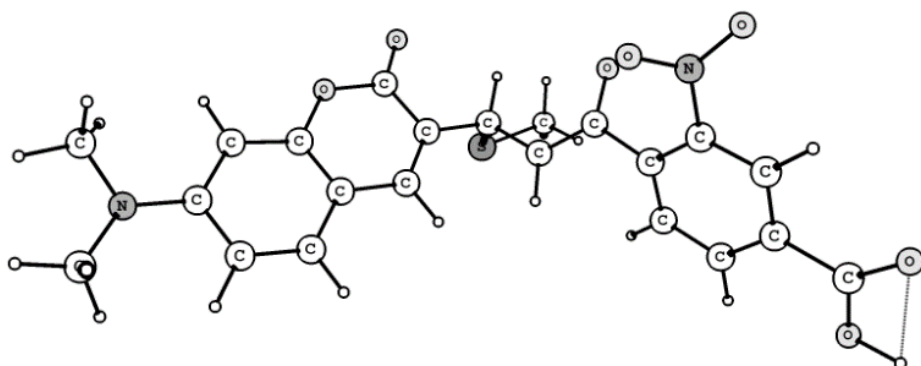

|    |              |              |              |
|----|--------------|--------------|--------------|
| 6  | 0.240901000  | -4.076456000 | -2.469659000 |
| 6  | 1.527479000  | -3.597669000 | -2.083649000 |
| 6  | 1.682189000  | -2.338033000 | -1.547183000 |
| 6  | 0.581149000  | -1.482876000 | -1.352291000 |
| 6  | -0.674812000 | -1.973546000 | -1.724667000 |
| 6  | -0.871342000 | -3.234414000 | -2.263087000 |
| 6  | 0.659157000  | -0.167232000 | -0.798472000 |
| 6  | -0.446565000 | 0.604392000  | -0.624534000 |
| 6  | -1.743235000 | 0.071767000  | -1.023050000 |
| 8  | -1.791269000 | -1.191720000 | -1.551752000 |
| 7  | 0.090861000  | -5.317100000 | -3.037198000 |
| 8  | -2.816600000 | 0.649429000  | -0.921438000 |
| 6  | -0.424874000 | 2.011714000  | -0.084162000 |
| 6  | 0.649001000  | 2.309235000  | 0.903053000  |
| 6  | 0.397943000  | 2.996362000  | 2.058777000  |
| 6  | 1.579668000  | 3.266140000  | 2.956171000  |
| 8  | -0.742022000 | 3.454956000  | 2.483144000  |
| 6  | 1.511153000  | 3.093999000  | 4.343751000  |
| 6  | 2.523324000  | 3.449014000  | 5.218263000  |
| 6  | 3.695372000  | 3.987125000  | 4.688553000  |
| 6  | 3.813626000  | 4.170041000  | 3.307616000  |
| 6  | 2.764224000  | 3.823584000  | 2.462506000  |
| 16 | -0.321166000 | 3.120899000  | -1.586037000 |
| 6  | -0.635712000 | 4.714522000  | -0.782670000 |
| 6  | 1.189877000  | -6.270561000 | -2.935997000 |
| 6  | -1.251332000 | -5.873492000 | -3.142273000 |
| 6  | 4.787496000  | 4.347569000  | 5.628849000  |
| 8  | 5.861161000  | 4.863511000  | 5.021346000  |
| 8  | 4.725125000  | 4.192930000  | 6.835496000  |
| 1  | 2.402224000  | -4.223412000 | -2.209435000 |
| 1  | 2.671128000  | -1.990443000 | -1.259107000 |
| 1  | -1.881141000 | -3.535739000 | -2.512957000 |
| 1  | 1.640093000  | 0.206071000  | -0.511811000 |
| 1  | -1.400792000 | 2.224559000  | 0.362729000  |
| 1  | 1.670956000  | 2.027144000  | 0.666623000  |
| 1  | 2.413788000  | 3.286706000  | 6.286106000  |
| 1  | 4.720075000  | 4.597714000  | 2.892350000  |
| 1  | 2.848606000  | 4.009469000  | 1.395910000  |
| 1  | -0.569819000 | 5.490006000  | -1.550247000 |
| 1  | -1.634817000 | 4.736928000  | -0.339015000 |
| 1  | 0.117761000  | 4.910740000  | -0.014414000 |
| 1  | 2.080017000  | -5.895606000 | -3.446890000 |
| 1  | 1.447353000  | -6.493699000 | -1.891406000 |
| 1  | 0.892052000  | -7.196333000 | -3.428162000 |

|   |              |              |              |
|---|--------------|--------------|--------------|
| 1 | -1.884166000 | -5.247206000 | -3.776374000 |
| 1 | -1.185361000 | -6.857538000 | -3.605799000 |
| 1 | -1.731016000 | -5.978112000 | -2.158727000 |
| 1 | 6.535739000  | 5.073642000  | 5.696022000  |
| 7 | 0.335849000  | 2.450816000  | 4.941789000  |
| 8 | -0.105621000 | 1.447753000  | 4.409540000  |
| 8 | -0.116104000 | 2.932740000  | 5.970187000  |

Frequencies

|           |           |           |           |           |           |
|-----------|-----------|-----------|-----------|-----------|-----------|
| 14.7834   | 21.7768   | 32.3894   | 37.286    | 42.5801   | 60.8224   |
| 63.0486   | 71.5134   | 81.2497   | 93.706    | 106.1296  | 112.4947  |
| 125.8126  | 129.4072  | 138.257   | 149.9494  | 156.1911  | 162.9107  |
| 178.3621  | 187.8383  | 198.801   | 205.431   | 232.8221  | 242.6119  |
| 252.2527  | 254.5319  | 284.3264  | 296.4427  | 324.0475  | 334.4214  |
| 343.8655  | 367.5985  | 386.0642  | 403.9646  | 410.2747  | 437.8451  |
| 446.1002  | 471.2821  | 476.9644  | 481.825   | 491.3478  | 515.7273  |
| 530.3357  | 562.3431  | 588.1683  | 609.103   | 640.6176  | 643.6987  |
| 653.9989  | 658.3333  | 673.4132  | 683.4264  | 696.6853  | 705.0091  |
| 729.4247  | 731.6256  | 748.1651  | 758.0073  | 767.7018  | 792.7106  |
| 796.9231  | 802.7328  | 810.0073  | 815.3457  | 818.2468  | 854.6416  |
| 868.7085  | 890.56    | 918.5821  | 944.2776  | 953.8366  | 955.3397  |
| 960.6167  | 983.5917  | 988.7932  | 1000.0514 | 1010.5565 | 1022.1622 |
| 1050.5968 | 1093.931  | 1100.9597 | 1131.1794 | 1147.866  | 1153.2674 |
| 1155.9807 | 1177.5096 | 1181.1504 | 1182.7579 | 1189.2367 | 1208.7915 |
| 1222.1047 | 1230.1522 | 1237.4845 | 1260.9264 | 1278.4419 | 1289.8438 |
| 1296.2457 | 1311.0916 | 1340.4502 | 1356.4797 | 1372.7495 | 1389.748  |
| 1397.9355 | 1406.9938 | 1426.9518 | 1447.6866 | 1461.494  | 1464.8474 |
| 1471.1888 | 1481.6366 | 1490.5025 | 1491.4252 | 1500.9721 | 1506.4791 |
| 1507.5657 | 1527.1956 | 1541.8646 | 1546.8686 | 1574.5082 | 1614.8046 |
| 1625.9555 | 1631.4445 | 1654.0759 | 1657.0434 | 1702.6476 | 1706.7436 |
| 1735.5079 | 1764.2434 | 3061.1696 | 3067.6078 | 3083.1812 | 3139.0416 |
| 3148.227  | 3153.6876 | 3173.387  | 3182.4755 | 3194.9925 | 3207.0702 |
| 3216.2403 | 3217.9465 | 3226.7054 | 3233.1431 | 3255.8104 | 3255.9067 |

|                                              |                             |
|----------------------------------------------|-----------------------------|
| E(RM062X)=                                   | -1883.53748                 |
| Zero-point correction=                       | 0.385332 (Hartree/Particle) |
| Thermal correction to Energy=                | 0.414834                    |
| Thermal correction to Enthalpy=              | 0.415778                    |
| Thermal correction to Gibbs Free Energy=     | 0.322179                    |
| Sum of electronic and zero-point Energies=   | -1883.152148                |
| Sum of electronic and thermal Energies=      | -1883.122646                |
| Sum of electronic and thermal Enthalpies=    | -1883.121702                |
| Sum of electronic and thermal Free Energies= | -1883.215301                |

2-NO<sub>2</sub>-b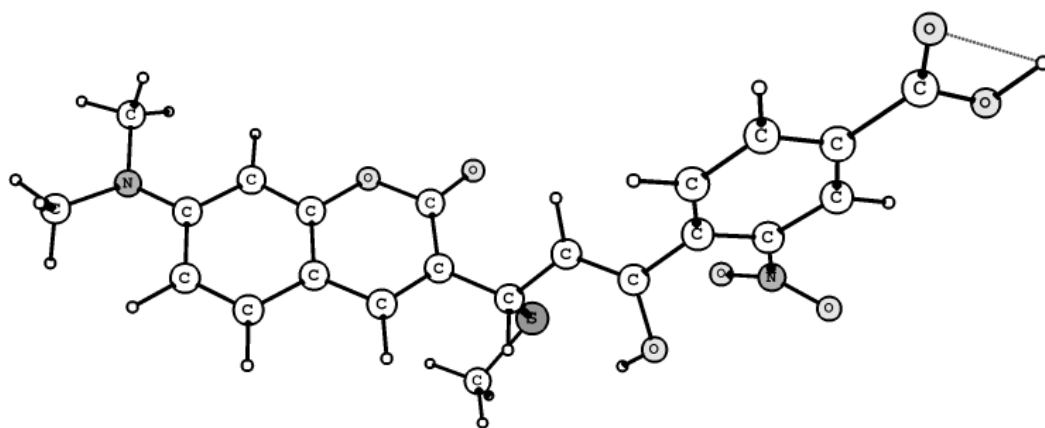

|    |              |              |              |
|----|--------------|--------------|--------------|
| 8  | 1.645073000  | -0.057729000 | 2.101358000  |
| 6  | 2.577918000  | -0.076804000 | 1.313097000  |
| 6  | 2.878981000  | -1.144951000 | 0.370471000  |
| 6  | 2.008738000  | -2.366682000 | 0.352070000  |
| 16 | 2.254439000  | -3.400591000 | 1.876538000  |
| 6  | 3.952739000  | -3.956663000 | 1.566201000  |
| 6  | 0.541181000  | -2.092385000 | 0.179699000  |
| 6  | -0.330313000 | -3.060264000 | -0.134381000 |
| 8  | 0.005809000  | -4.377253000 | -0.316994000 |
| 6  | -1.770821000 | -2.805864000 | -0.362143000 |
| 6  | -2.774747000 | -3.642133000 | 0.143389000  |
| 6  | -4.120133000 | -3.474744000 | -0.139793000 |
| 6  | -4.497126000 | -2.399300000 | -0.943108000 |
| 6  | -5.926299000 | -2.148822000 | -1.275744000 |
| 8  | -6.759135000 | -3.039011000 | -0.729596000 |
| 8  | -6.304423000 | -1.228056000 | -1.975312000 |
| 6  | -3.527892000 | -1.530255000 | -1.447015000 |
| 6  | -2.182001000 | -1.743195000 | -1.171434000 |
| 6  | 3.975816000  | -1.034854000 | -0.426366000 |
| 6  | 4.830351000  | 0.108180000  | -0.375728000 |
| 6  | 5.973451000  | 0.294592000  | -1.176273000 |
| 6  | 6.747457000  | 1.428657000  | -1.067966000 |
| 6  | 6.420159000  | 2.453209000  | -0.130993000 |
| 7  | 7.219317000  | 3.560372000  | 0.011979000  |
| 6  | 6.686699000  | 4.704939000  | 0.740128000  |
| 6  | 8.191085000  | 3.861842000  | -1.034554000 |
| 6  | 5.263258000  | 2.287236000  | 0.658559000  |
| 6  | 4.512961000  | 1.131520000  | 0.524781000  |
| 8  | 3.404168000  | 1.016436000  | 1.327859000  |
| 1  | 2.350384000  | -3.001343000 | -0.476490000 |
| 1  | 4.217935000  | -4.649414000 | 2.368508000  |
| 1  | 4.647865000  | -3.113000000 | 1.582902000  |
| 1  | 4.020986000  | -4.477763000 | 0.607525000  |
| 1  | 0.165925000  | -1.086419000 | 0.332383000  |
| 1  | 0.802212000  | -4.593632000 | 0.207870000  |
| 1  | -4.853627000 | -4.152794000 | 0.282715000  |
| 1  | -7.675503000 | -2.818824000 | -0.987244000 |
| 1  | -3.828156000 | -0.696006000 | -2.072851000 |
| 1  | -1.429243000 | -1.094335000 | -1.607783000 |
| 1  | 4.217717000  | -1.835375000 | -1.124159000 |
| 1  | 6.239995000  | -0.476777000 | -1.894409000 |
| 1  | 7.614753000  | 1.532048000  | -1.707964000 |

|   |              |              |              |
|---|--------------|--------------|--------------|
| 1 | 5.770758000  | 5.096376000  | 0.275046000  |
| 1 | 7.439675000  | 5.492644000  | 0.750984000  |
| 1 | 6.467737000  | 4.440128000  | 1.777539000  |
| 1 | 8.926599000  | 3.059492000  | -1.126405000 |
| 1 | 8.727067000  | 4.769296000  | -0.756905000 |
| 1 | 7.713604000  | 4.018585000  | -2.011562000 |
| 1 | 4.936004000  | 3.030801000  | 1.374640000  |
| 7 | -2.438634000 | -4.715309000 | 1.085905000  |
| 8 | -3.053487000 | -5.766247000 | 0.994453000  |
| 8 | -1.590224000 | -4.491506000 | 1.932258000  |

#### Frequencies

|           |           |           |           |           |           |
|-----------|-----------|-----------|-----------|-----------|-----------|
| 9.5816    | 22.333    | 24.5369   | 41.758    | 49.7752   | 52.1085   |
| 58.5863   | 66.1253   | 79.0691   | 82.0321   | 92.5773   | 116.9202  |
| 122.1397  | 127.8063  | 139.7044  | 152.7181  | 157.2856  | 160.2999  |
| 168.5548  | 190.2297  | 204.4296  | 215.356   | 226.9123  | 241.9384  |
| 255.9451  | 257.2629  | 273.5293  | 287.9004  | 318.4825  | 331.5164  |
| 341.5671  | 365.837   | 381.4601  | 386.5058  | 405.4591  | 424.8425  |
| 433.1513  | 458.9234  | 465.6234  | 474.2648  | 479.255   | 509.6431  |
| 515.2575  | 534.5049  | 544.0841  | 555.332   | 599.1164  | 614.392   |
| 632.3838  | 652.9916  | 656.5835  | 659.4658  | 691.24    | 697.9748  |
| 708.1908  | 728.4898  | 739.964   | 746.7392  | 755.5575  | 785.888   |
| 795.8223  | 801.6597  | 808.292   | 817.3047  | 818.8989  | 845.3782  |
| 853.0486  | 854.0115  | 891.8277  | 901.6098  | 945.4622  | 951.6249  |
| 962.0277  | 966.8642  | 990.0096  | 999.837   | 1004.7003 | 1008.61   |
| 1024.4309 | 1032.9927 | 1088.2339 | 1107.5089 | 1124.3692 | 1138.1236 |
| 1139.0725 | 1147.8553 | 1156.6696 | 1181.5751 | 1184.1927 | 1188.6713 |
| 1220.0326 | 1229.7159 | 1233.8503 | 1239.3019 | 1249.2982 | 1278.3866 |
| 1292.1169 | 1307.0374 | 1308.0852 | 1325.2298 | 1356.3509 | 1371.6768 |
| 1385.9571 | 1389.836  | 1390.7885 | 1406.4438 | 1417.2479 | 1447.9389 |
| 1456.6375 | 1457.8666 | 1469.7102 | 1482.9671 | 1488.5133 | 1493.4306 |
| 1495.665  | 1501.9757 | 1509.2648 | 1520.9714 | 1534.5017 | 1563.3529 |
| 1572.4485 | 1612.9592 | 1630.2609 | 1650.6283 | 1658.7639 | 1704.5147 |
| 1711.2839 | 1743.2784 | 1746.0382 | 1774.8551 | 3056.279  | 3066.0098 |
| 3085.0559 | 3091.7869 | 3150.5535 | 3152.7539 | 3178.6133 | 3186.7719 |
| 3193.3756 | 3201.3628 | 3207.2258 | 3218.9134 | 3243.7512 | 3248.38   |
| 3259.4352 | 3259.8859 | 3261.3392 | 3274.3472 | 3663.7542 | 3715.5367 |

|                                              |                             |
|----------------------------------------------|-----------------------------|
| E(RM062X)=                                   | -1884.00019                 |
| Zero-point correction=                       | 0.397648 (Hartree/Particle) |
| Thermal correction to Energy=                | 0.42762                     |
| Thermal correction to Enthalpy=              | 0.428564                    |
| Thermal correction to Gibbs Free Energy=     | 0.333463                    |
| Sum of electronic and zero-point Energies=   | -1883.602542                |
| Sum of electronic and thermal Energies=      | -1883.57257                 |
| Sum of electronic and thermal Enthalpies=    | -1883.571626                |
| Sum of electronic and thermal Free Energies= | -1883.666727                |

2-NO<sub>2</sub>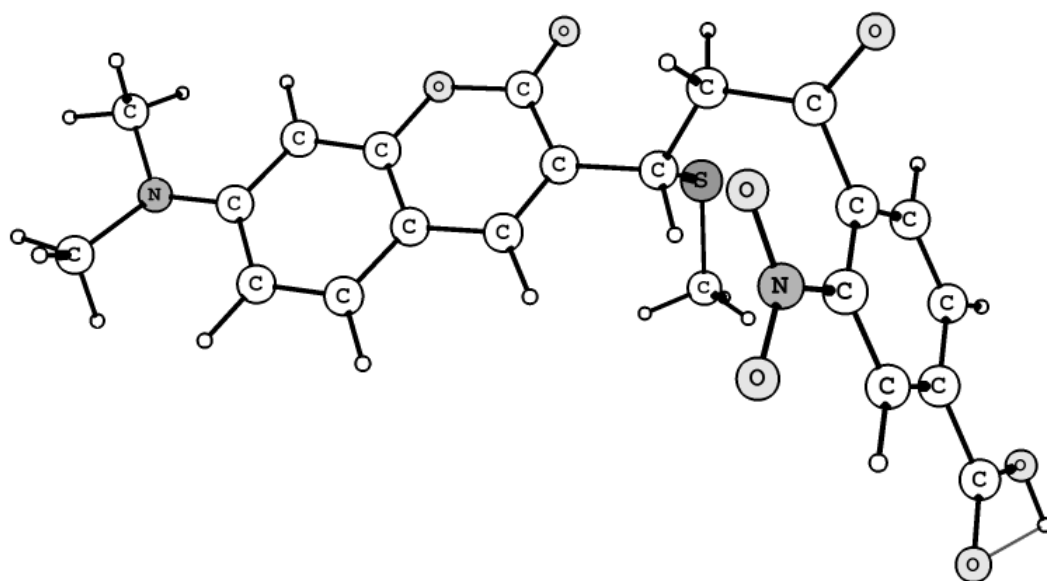

|    |              |              |              |
|----|--------------|--------------|--------------|
| 8  | 0.967943000  | 0.559072000  | 1.364044000  |
| 6  | 2.124664000  | 0.426769000  | 0.993664000  |
| 6  | 2.736673000  | -0.820231000 | 0.559982000  |
| 6  | 1.906523000  | -2.072113000 | 0.577227000  |
| 16 | 1.515039000  | -2.614519000 | 2.295901000  |
| 6  | 2.920346000  | -3.734941000 | 2.538903000  |
| 6  | 0.615021000  | -1.982784000 | -0.239285000 |
| 6  | 0.001473000  | -3.317035000 | -0.621743000 |
| 6  | 0.749288000  | -4.622133000 | -0.414336000 |
| 6  | 1.837262000  | -5.077719000 | -1.165853000 |
| 6  | 2.479782000  | -6.278762000 | -0.906381000 |
| 6  | 2.018229000  | -7.066446000 | 0.143008000  |
| 6  | 0.922135000  | -6.651427000 | 0.902689000  |
| 6  | 0.295272000  | -5.441392000 | 0.620175000  |
| 8  | -1.143698000 | -3.378466000 | -1.029470000 |
| 6  | 4.043382000  | -0.822031000 | 0.185790000  |
| 6  | 4.831164000  | 0.371015000  | 0.205637000  |
| 6  | 6.186470000  | 0.448266000  | -0.167625000 |
| 6  | 6.877395000  | 1.639342000  | -0.118818000 |
| 6  | 6.242349000  | 2.838302000  | 0.318956000  |
| 7  | 6.945316000  | 4.016219000  | 0.410493000  |
| 6  | 6.192427000  | 5.255797000  | 0.555668000  |
| 6  | 8.215944000  | 4.117788000  | -0.301084000 |
| 6  | 4.878711000  | 2.776611000  | 0.672334000  |
| 6  | 4.219382000  | 1.560285000  | 0.617911000  |
| 8  | 2.895940000  | 1.557622000  | 0.990271000  |
| 1  | 2.542007000  | -2.861561000 | 0.162247000  |
| 1  | 2.849279000  | -4.141712000 | 3.550544000  |
| 1  | 3.867134000  | -3.196455000 | 2.438611000  |
| 1  | 2.880696000  | -4.557353000 | 1.816555000  |
| 1  | 0.801327000  | -1.443378000 | -1.176012000 |
| 1  | -0.161876000 | -1.427360000 | 0.294469000  |
| 1  | 3.315860000  | -6.599437000 | -1.517740000 |
| 1  | 0.552891000  | -7.269009000 | 1.714439000  |
| 1  | -0.552549000 | -5.118813000 | 1.216169000  |
| 1  | 4.511690000  | -1.750374000 | -0.139242000 |
| 1  | 6.689685000  | -0.455570000 | -0.501861000 |



|   |             |              |              |
|---|-------------|--------------|--------------|
| 1 | 7.918075000 | 1.651285000  | -0.417382000 |
| 1 | 5.604734000 | 5.246865000  | 1.476916000  |
| 1 | 5.515316000 | 5.428783000  | -0.293129000 |
| 1 | 6.895963000 | 6.085654000  | 0.620321000  |
| 1 | 8.099524000 | 3.946221000  | -1.380070000 |
| 1 | 8.940960000 | 3.402859000  | 0.094562000  |
| 1 | 8.620637000 | 5.117867000  | -0.146820000 |
| 1 | 4.321286000 | 3.648675000  | 0.990543000  |
| 6 | 2.718351000 | -8.356078000 | 0.406611000  |
| 8 | 3.687812000 | -8.735489000 | -0.221802000 |
| 8 | 2.172092000 | -9.055453000 | 1.403041000  |
| 1 | 2.667406000 | -9.890054000 | 1.517730000  |
| 7 | 2.317693000 | -4.287764000 | -2.302872000 |
| 8 | 3.325358000 | -4.649553000 | -2.883980000 |
| 8 | 1.674538000 | -3.293810000 | -2.608326000 |

#### Frequencies

|           |           |           |           |           |           |
|-----------|-----------|-----------|-----------|-----------|-----------|
| 14.6403   | 19.4779   | 31.0278   | 34.6845   | 40.5568   | 56.3735   |
| 61.3405   | 79.8821   | 84.945    | 92.0888   | 105.0642  | 111.6225  |
| 121.0595  | 127.5482  | 142.2758  | 154.6257  | 160.2661  | 173.6929  |
| 177.564   | 204.9022  | 209.7392  | 217.3115  | 239.5889  | 251.5448  |
| 253.2408  | 275.8852  | 278.0359  | 297.6758  | 301.4458  | 341.6621  |
| 352.1089  | 371.079   | 400.5661  | 408.7826  | 417.3757  | 440.8212  |
| 449.8627  | 464.7188  | 470.3587  | 478.8377  | 485.7203  | 513.603   |
| 531.2368  | 536.3144  | 566.1625  | 584.7455  | 614.5483  | 619.9098  |
| 628.0168  | 639.0745  | 660.7735  | 697.7646  | 699.2639  | 707.9511  |
| 717.8368  | 729.0901  | 742.3335  | 749.9013  | 759.6485  | 786.5267  |
| 799.5724  | 802.9384  | 815.8008  | 826.8615  | 828.3439  | 854.1862  |
| 883.6654  | 891.8891  | 941.3507  | 950.8626  | 958.6937  | 960.8307  |
| 976.6753  | 996.5048  | 1001.7539 | 1010.1643 | 1016.5625 | 1025.5542 |
| 1056.2477 | 1095.4964 | 1103.0367 | 1120.9462 | 1131.4164 | 1149.1394 |
| 1150.1128 | 1161.6717 | 1180.6936 | 1182.2491 | 1190.49   | 1203.3794 |
| 1217.4211 | 1228.1667 | 1236.0684 | 1276.8905 | 1284.0688 | 1291.3349 |
| 1298.3387 | 1308.7938 | 1312.947  | 1336.9711 | 1366.1449 | 1385.8432 |
| 1391.6484 | 1393.3409 | 1393.8311 | 1418.8881 | 1450.4557 | 1455.8506 |
| 1457.596  | 1463.7171 | 1464.0102 | 1470.509  | 1481.7538 | 1494.3155 |
| 1499.9294 | 1505.1798 | 1510.2365 | 1529.9092 | 1540.8531 | 1554.4662 |
| 1577.4165 | 1613.4585 | 1630.5189 | 1658.5079 | 1661.5053 | 1701.6609 |
| 1715.81   | 1743.6458 | 1777.5394 | 1787.0562 | 3057.0367 | 3067.4155 |
| 3078.6339 | 3098.8572 | 3121.2763 | 3148.6802 | 3156.3231 | 3161.7343 |
| 3165.9567 | 3186.0821 | 3196.7834 | 3206.1467 | 3214.6072 | 3222.0184 |
| 3251.0226 | 3260.7189 | 3273.4112 | 3277.8921 | 3281.6848 | 3688.6915 |

|                                              |                             |
|----------------------------------------------|-----------------------------|
| E(RM062X)=                                   | -1884.01485                 |
| Zero-point correction=                       | 0.399029 (Hartree/Particle) |
| Thermal correction to Energy=                | 0.428495                    |
| Thermal correction to Enthalpy=              | 0.429439                    |
| Thermal correction to Gibbs Free Energy=     | 0.336052                    |
| Sum of electronic and zero-point Energies=   | -1883.615821                |
| Sum of electronic and thermal Energies=      | -1883.586355                |
| Sum of electronic and thermal Enthalpies=    | -1883.585411                |
| Sum of electronic and thermal Free Energies= | -1883.678798                |

1-OH

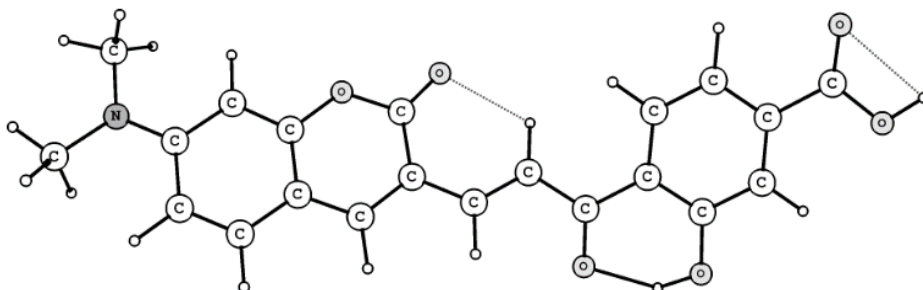

|   |              |             |              |
|---|--------------|-------------|--------------|
| 6 | 11.391625000 | 4.156438000 | -0.165392000 |
| 6 | 11.236373000 | 2.847044000 | 0.396799000  |
| 6 | 10.060909000 | 2.476836000 | 0.997804000  |
| 6 | 8.964750000  | 3.367566000 | 1.081275000  |
| 6 | 9.134560000  | 4.648309000 | 0.522025000  |
| 6 | 10.302058000 | 5.059182000 | -0.086197000 |
| 6 | 7.725785000  | 3.060107000 | 1.678802000  |
| 6 | 6.685878000  | 3.963087000 | 1.723054000  |
| 6 | 6.882343000  | 5.281145000 | 1.137564000  |
| 8 | 8.104040000  | 5.551990000 | 0.569992000  |
| 7 | 12.552207000 | 4.519369000 | -0.757932000 |
| 8 | 6.066580000  | 6.187794000 | 1.097563000  |
| 6 | 5.437641000  | 3.579288000 | 2.344524000  |
| 6 | 4.281488000  | 4.276148000 | 2.435636000  |
| 6 | 3.139254000  | 3.665344000 | 3.122855000  |
| 6 | 1.793264000  | 4.292118000 | 3.030746000  |
| 6 | 13.666998000 | 3.583938000 | -0.836659000 |
| 6 | 12.700313000 | 5.859278000 | -1.308941000 |
| 6 | 0.712190000  | 3.748515000 | 3.763858000  |
| 6 | -0.559847000 | 4.323321000 | 3.680962000  |
| 6 | -0.766169000 | 5.429049000 | 2.867875000  |
| 6 | 0.286415000  | 5.979341000 | 2.125774000  |
| 6 | 1.544450000  | 5.410093000 | 2.213082000  |
| 8 | 3.279135000  | 2.618972000 | 3.786012000  |
| 6 | -2.114281000 | 6.057266000 | 2.759262000  |
| 8 | -2.345714000 | 7.054731000 | 2.101039000  |
| 8 | -3.058514000 | 5.416917000 | 3.455972000  |
| 1 | 12.053937000 | 2.138525000 | 0.350853000  |
| 1 | 9.955378000  | 1.481654000 | 1.421818000  |
| 1 | 10.355819000 | 6.063003000 | -0.489223000 |
| 1 | 7.586271000  | 2.073033000 | 2.116807000  |
| 1 | 5.454243000  | 2.580142000 | 2.779802000  |
| 1 | 4.185625000  | 5.262521000 | 2.007398000  |
| 1 | 13.389838000 | 2.684164000 | -1.396620000 |
| 1 | 14.493024000 | 4.069019000 | -1.353974000 |
| 1 | 14.009924000 | 3.287490000 | 0.160857000  |
| 1 | 11.968383000 | 6.044667000 | -2.103210000 |
| 1 | 12.574866000 | 6.622320000 | -0.532365000 |
| 1 | 13.698977000 | 5.958592000 | -1.731112000 |
| 1 | -1.365983000 | 3.882312000 | 4.257573000  |
| 1 | 0.111911000  | 6.838970000 | 1.487966000  |
| 1 | 2.345222000  | 5.841018000 | 1.623927000  |
| 1 | -3.908789000 | 5.884618000 | 3.343129000  |
| 8 | 0.837842000  | 2.668689000 | 4.569115000  |
| 1 | 1.773200000  | 2.354923000 | 4.493132000  |

Frequencies

|           |           |           |           |           |           |
|-----------|-----------|-----------|-----------|-----------|-----------|
| 20.7605   | 33.2931   | 39.4836   | 47.8358   | 56.6905   | 81.9718   |
| 88.2654   | 99.9752   | 110.3845  | 123.9418  | 144.9413  | 151.191   |
| 162.8803  | 177.4736  | 200.1188  | 212.9754  | 224.4415  | 231.3333  |
| 280.4969  | 284.6961  | 308.3473  | 316.5718  | 324.8639  | 342.0137  |
| 364.424   | 392.9796  | 426.465   | 439.3171  | 446.4557  | 467.4347  |
| 472.6422  | 482.2255  | 483.7963  | 499.8233  | 537.0734  | 545.1028  |
| 555.8212  | 581.9014  | 585.875   | 604.7723  | 633.2262  | 665.1796  |
| 667.4599  | 687.423   | 702.4951  | 727.1989  | 735.7988  | 752.2485  |
| 753.4523  | 762.7329  | 775.5491  | 797.0743  | 810.6227  | 824.9542  |
| 857.0381  | 859.1794  | 863.8246  | 899.3769  | 902.5397  | 915.8589  |
| 953.4065  | 963.7983  | 990.019   | 997.0432  | 1010.0904 | 1012.8206 |
| 1033.0783 | 1057.0918 | 1102.6509 | 1106.0766 | 1124.786  | 1153.689  |
| 1169.5151 | 1171.41   | 1174.7862 | 1188.3276 | 1195.7721 | 1226.5658 |
| 1230.9671 | 1247.8033 | 1263.9196 | 1293.1184 | 1297.2203 | 1312.2065 |
| 1326.5884 | 1350.4361 | 1356.7189 | 1386.3575 | 1395.0603 | 1406.9524 |
| 1413.8054 | 1429.8495 | 1449.1176 | 1460.0269 | 1469.3001 | 1499.3263 |
| 1502.3451 | 1507.328  | 1511.3467 | 1530.2965 | 1538.5507 | 1554.9805 |
| 1569.8824 | 1599.3536 | 1609.797  | 1642.2919 | 1649.7312 | 1685.1774 |
| 1698.0213 | 1709.7595 | 1757.537  | 1774.9538 | 3075.0665 | 3080.8016 |
| 3137.4986 | 3138.9485 | 3205.7423 | 3210.0804 | 3223.5836 | 3235.4109 |
| 3238.0112 | 3246.9754 | 3253.3363 | 3259.9447 | 3261.0512 | 3265.7715 |

|                                              |                             |
|----------------------------------------------|-----------------------------|
| E(RM062X)=                                   | -1316.13306                 |
| Zero-point correction=                       | 0.348154 (Hartree/Particle) |
| Thermal correction to Energy=                | 0.372262                    |
| Thermal correction to Enthalpy=              | 0.373206                    |
| Thermal correction to Gibbs Free Energy=     | 0.293023                    |
| Sum of electronic and zero-point Energies=   | -1315.784906                |
| Sum of electronic and thermal Energies=      | -1315.760798                |
| Sum of electronic and thermal Enthalpies=    | -1315.759854                |
| Sum of electronic and thermal Free Energies= | -1315.840037                |

2-OH-a

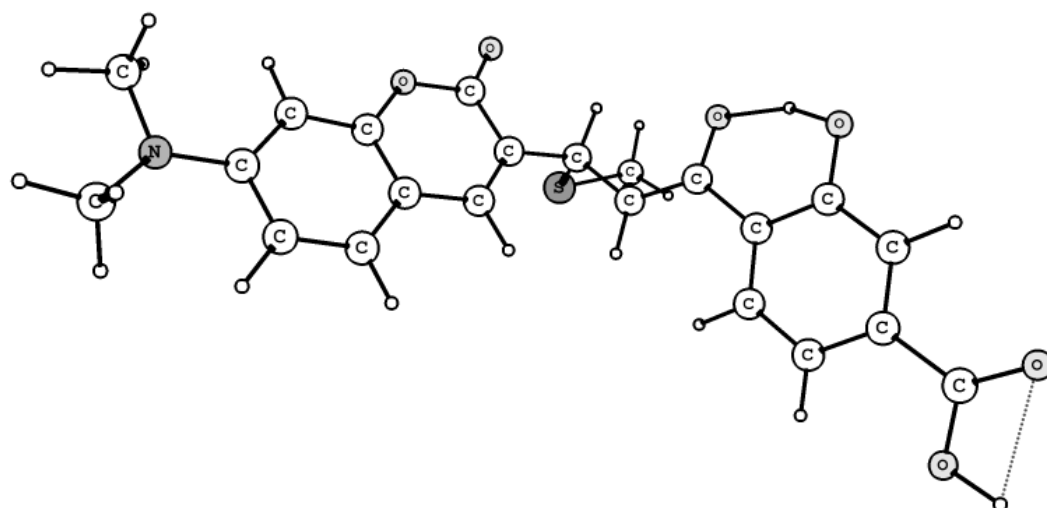

|    |              |              |              |
|----|--------------|--------------|--------------|
| 6  | 0.352277000  | -4.023412000 | -2.563856000 |
| 6  | 1.626392000  | -3.498883000 | -2.197272000 |
| 6  | 1.740302000  | -2.248909000 | -1.629169000 |
| 6  | 0.608262000  | -1.450239000 | -1.379000000 |
| 6  | -0.634268000 | -1.985164000 | -1.733708000 |
| 6  | -0.789111000 | -3.235952000 | -2.308838000 |
| 6  | 0.643309000  | -0.153106000 | -0.778159000 |
| 6  | -0.490544000 | 0.558969000  | -0.543858000 |
| 6  | -1.774284000 | -0.024039000 | -0.915366000 |
| 8  | -1.780224000 | -1.265381000 | -1.496047000 |
| 7  | 0.240904000  | -5.257609000 | -3.156608000 |
| 8  | -2.869748000 | 0.492165000  | -0.746070000 |
| 6  | -0.523318000 | 1.938583000  | 0.063661000  |
| 6  | 0.620621000  | 2.278887000  | 0.954392000  |
| 6  | 0.439592000  | 2.831819000  | 2.186466000  |
| 6  | 1.627252000  | 3.209093000  | 3.027073000  |
| 8  | -0.744944000 | 3.054722000  | 2.741754000  |
| 6  | 1.461967000  | 3.353174000  | 4.424916000  |
| 6  | 2.550915000  | 3.656558000  | 5.241323000  |
| 6  | 3.813494000  | 3.844573000  | 4.680406000  |
| 6  | 3.992756000  | 3.742655000  | 3.296178000  |
| 6  | 2.902964000  | 3.432918000  | 2.492133000  |
| 16 | -0.645661000 | 3.135784000  | -1.364502000 |
| 6  | -1.082643000 | 4.625754000  | -0.429854000 |
| 6  | 1.363788000  | -6.183960000 | -3.051996000 |
| 6  | -1.084269000 | -5.854039000 | -3.260779000 |
| 6  | 4.940714000  | 4.166315000  | 5.589716000  |
| 8  | 6.109402000  | 4.340811000  | 4.955371000  |
| 8  | 4.842140000  | 4.267308000  | 6.801727000  |
| 1  | 2.524512000  | -4.079582000 | -2.366637000 |
| 1  | 2.720585000  | -1.865149000 | -1.357814000 |
| 1  | -1.791134000 | -3.576617000 | -2.538329000 |
| 1  | 1.614167000  | 0.253031000  | -0.502828000 |
| 1  | -1.462938000 | 2.050875000  | 0.611967000  |
| 1  | 1.624550000  | 2.141748000  | 0.567200000  |
| 1  | 2.399693000  | 3.747342000  | 6.312932000  |
| 1  | 4.967647000  | 3.907197000  | 2.850921000  |
| 1  | 3.049271000  | 3.372633000  | 1.418020000  |
| 1  | -1.127116000 | 5.459674000  | -1.134882000 |

|   |              |              |              |
|---|--------------|--------------|--------------|
| 1 | -2.058523000 | 4.511725000  | 0.049640000  |
| 1 | -0.320165000 | 4.838261000  | 0.325334000  |
| 1 | 2.249077000  | -5.784950000 | -3.552542000 |
| 1 | 1.616897000  | -6.406885000 | -2.006292000 |
| 1 | 1.093830000  | -7.113343000 | -3.553246000 |
| 1 | -1.741515000 | -5.232407000 | -3.874151000 |
| 1 | -0.993034000 | -6.824416000 | -3.748500000 |
| 1 | -1.550262000 | -5.996555000 | -2.275309000 |
| 1 | 6.797420000  | 4.549676000  | 5.616001000  |
| 8 | 0.240846000  | 3.186769000  | 4.997585000  |
| 1 | -0.393559000 | 3.118359000  | 4.179050000  |

Frequencies

|           |           |           |           |           |           |
|-----------|-----------|-----------|-----------|-----------|-----------|
| 19.5939   | 21.6607   | 32.3034   | 38.3145   | 56.1809   | 58.2522   |
| 69.546    | 84.4478   | 92.3672   | 101.8494  | 108.5927  | 122.7633  |
| 130.1675  | 148.9631  | 172.9316  | 177.2109  | 193.2638  | 201.0564  |
| 208.8316  | 222.3517  | 240.5692  | 246.3896  | 255.3085  | 266.5323  |
| 292.9356  | 323.0146  | 325.8156  | 336.4337  | 364.371   | 385.7013  |
| 398.8166  | 411.423   | 438.175   | 452.7239  | 464.1538  | 475.269   |
| 479.6916  | 496.9993  | 509.7871  | 529.1034  | 558.0151  | 565.0945  |
| 585.8351  | 590.746   | 638.2086  | 643.1136  | 652.5626  | 654.1854  |
| 667.1926  | 680.2544  | 706.9668  | 728.4473  | 739.5828  | 747.1348  |
| 752.3874  | 761.0158  | 784.2757  | 796.3631  | 809.7992  | 814.1636  |
| 816.6263  | 839.2952  | 857.7659  | 864.2197  | 913.5133  | 918.4877  |
| 952.6025  | 953.573   | 957.4911  | 983.9438  | 992.2932  | 997.1936  |
| 1000.3469 | 1004.7547 | 1013.1041 | 1039.251  | 1090.2575 | 1099.4261 |
| 1121.4631 | 1150.8964 | 1152.1449 | 1156.163  | 1176.6373 | 1184.5425 |
| 1190.2333 | 1198.5202 | 1206.9527 | 1216.0941 | 1238.1325 | 1245.1237 |
| 1265.6551 | 1275.6834 | 1289.5865 | 1297.5463 | 1308.8708 | 1331.6457 |
| 1338.1685 | 1379.9674 | 1382.261  | 1385.6703 | 1391.943  | 1410.3957 |
| 1437.6921 | 1445.4246 | 1470.1886 | 1474.0995 | 1490.0337 | 1491.6684 |
| 1497.1041 | 1501.0578 | 1504.5389 | 1508.2054 | 1526.7847 | 1541.888  |
| 1572.4986 | 1574.3942 | 1614.1695 | 1649.9734 | 1657.5332 | 1665.7982 |
| 1696.8096 | 1705.0189 | 1740.8567 | 1753.8874 | 2473.4091 | 3061.3886 |
| 3067.4877 | 3087.8367 | 3138.9044 | 3148.1661 | 3153.7182 | 3179.8361 |
| 3182.4417 | 3192.8753 | 3207.072  | 3218.6081 | 3221.8907 | 3230.0099 |
| 3238.3561 | 3246.7653 | 3259.1842 | 3263.6874 | 3265.1683 | 3711.7416 |

|                                              |                             |
|----------------------------------------------|-----------------------------|
| E(RM062X)=                                   | -1754.31905                 |
| Zero-point correction=                       | 0.386117 (Hartree/Particle) |
| Thermal correction to Energy=                | 0.413626                    |
| Thermal correction to Enthalpy=              | 0.41457                     |
| Thermal correction to Gibbs Free Energy=     | 0.326023                    |
| Sum of electronic and zero-point Energies=   | -1753.932933                |
| Sum of electronic and thermal Energies=      | -1753.905424                |
| Sum of electronic and thermal Enthalpies=    | -1753.90448                 |
| Sum of electronic and thermal Free Energies= | -1753.993027                |

2-OH-b

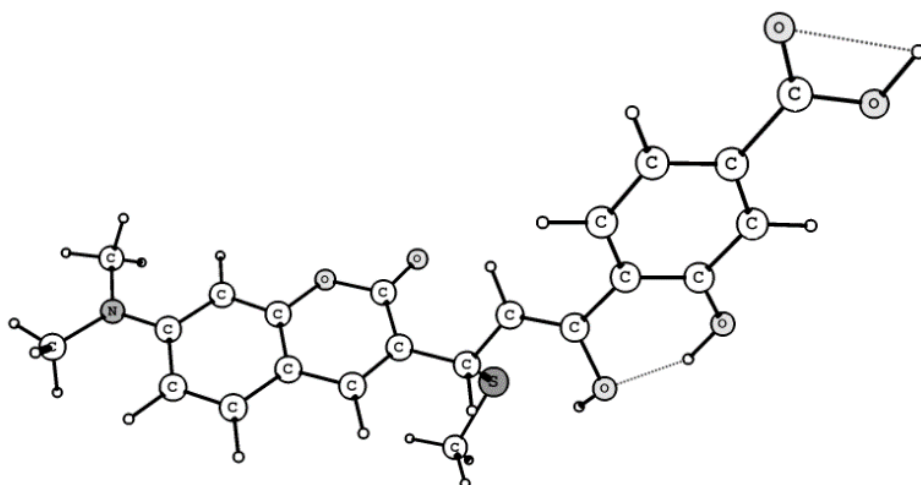

|    |              |              |              |
|----|--------------|--------------|--------------|
| 8  | 1.705217000  | -0.008163000 | 2.249872000  |
| 6  | 2.614273000  | -0.053693000 | 1.434129000  |
| 6  | 2.889664000  | -1.152892000 | 0.523320000  |
| 6  | 2.016301000  | -2.371773000 | 0.566306000  |
| 16 | 2.264156000  | -3.343999000 | 2.130204000  |
| 6  | 3.948271000  | -3.942132000 | 1.820953000  |
| 6  | 0.553390000  | -2.086704000 | 0.368448000  |
| 6  | -0.329683000 | -3.049917000 | 0.063329000  |
| 8  | 0.025996000  | -4.383733000 | 0.006336000  |
| 6  | -1.751043000 | -2.810248000 | -0.266014000 |
| 6  | -2.756420000 | -3.748672000 | 0.041534000  |
| 6  | -4.091562000 | -3.473896000 | -0.252671000 |
| 6  | -4.439348000 | -2.267531000 | -0.854980000 |
| 6  | -5.855826000 | -1.950265000 | -1.174656000 |
| 8  | -6.705135000 | -2.947659000 | -0.898632000 |
| 8  | -6.227239000 | -0.888585000 | -1.644178000 |
| 6  | -3.455007000 | -1.329287000 | -1.180257000 |
| 6  | -2.129176000 | -1.613389000 | -0.893821000 |
| 6  | 3.953645000  | -1.062601000 | -0.320862000 |
| 6  | 4.791026000  | 0.090390000  | -0.353955000 |
| 6  | 5.886277000  | 0.259970000  | -1.224042000 |
| 6  | 6.637805000  | 1.412113000  | -1.214406000 |
| 6  | 6.331586000  | 2.477778000  | -0.312914000 |
| 7  | 7.071585000  | 3.618248000  | -0.307597000 |
| 6  | 6.742770000  | 4.692177000  | 0.615472000  |
| 6  | 8.151808000  | 3.795830000  | -1.266033000 |
| 6  | 5.237608000  | 2.317103000  | 0.568450000  |
| 6  | 4.503476000  | 1.145323000  | 0.522837000  |
| 8  | 3.440108000  | 1.040794000  | 1.387940000  |
| 1  | 2.357143000  | -3.043763000 | -0.232383000 |
| 1  | 4.214751000  | -4.603534000 | 2.648857000  |
| 1  | 4.655631000  | -3.109159000 | 1.791922000  |
| 1  | 3.994036000  | -4.504971000 | 0.884852000  |
| 1  | 0.202714000  | -1.065124000 | 0.460569000  |
| 1  | 0.791755000  | -4.546254000 | 0.595333000  |
| 1  | -4.842039000 | -4.215065000 | 0.002334000  |
| 1  | -7.610559000 | -2.664571000 | -1.131175000 |
| 1  | -3.727463000 | -0.398364000 | -1.666020000 |
| 1  | -1.357470000 | -0.901129000 | -1.170428000 |
| 1  | 4.173910000  | -1.885934000 | -0.999201000 |

|   |              |              |              |
|---|--------------|--------------|--------------|
| 1 | 6.131717000  | -0.541534000 | -1.916336000 |
| 1 | 7.469633000  | 1.504444000  | -1.901815000 |
| 1 | 5.735386000  | 5.086140000  | 0.431728000  |
| 1 | 7.459224000  | 5.501947000  | 0.484145000  |
| 1 | 6.795715000  | 4.349806000  | 1.655481000  |
| 1 | 8.937496000  | 3.044322000  | -1.127480000 |
| 1 | 8.592589000  | 4.780753000  | -1.118164000 |
| 1 | 7.785266000  | 3.733964000  | -2.297436000 |
| 1 | 4.946149000  | 3.087352000  | 1.272221000  |
| 8 | -2.506123000 | -4.940776000 | 0.660695000  |
| 1 | -1.541846000 | -5.104072000 | 0.659491000  |

Frequencies

|           |           |           |           |           |           |
|-----------|-----------|-----------|-----------|-----------|-----------|
| 16.6736   | 26.4725   | 34.3083   | 47.8541   | 54.6441   | 59.4265   |
| 62.6071   | 81.209    | 83.591    | 91.2011   | 116.4486  | 124.3565  |
| 132.9134  | 144.3411  | 157.2469  | 168.5822  | 174.2342  | 196.8938  |
| 209.4734  | 211.3345  | 221.2565  | 235.3932  | 255.6643  | 288.7188  |
| 290.3451  | 301.3832  | 319.7078  | 324.8558  | 351.5386  | 373.8079  |
| 403.4781  | 423.9669  | 426.4612  | 452.2416  | 462.8482  | 471.8522  |
| 475.3219  | 481.2082  | 501.4571  | 516.5941  | 536.6628  | 546.4503  |
| 552.6792  | 567.2386  | 581.5338  | 596.0671  | 618.4276  | 630.7664  |
| 653.9199  | 658.1093  | 664.7974  | 699.2505  | 710.5161  | 729.3078  |
| 742.6076  | 749.0133  | 749.3281  | 761.234   | 782.6887  | 803.244   |
| 806.8367  | 819.2265  | 835.2347  | 842.6496  | 845.6837  | 865.3326  |
| 899.8876  | 911.9988  | 953.2774  | 960.0948  | 964.6077  | 990.3569  |
| 994.0292  | 999.6004  | 1009.1439 | 1010.5353 | 1035.1246 | 1104.5843 |
| 1109.4348 | 1122.5623 | 1139.3179 | 1151.1835 | 1152.4539 | 1161.6875 |
| 1176.7852 | 1188.0484 | 1191.5604 | 1219.661  | 1234.8045 | 1237.4712 |
| 1242.4676 | 1254.2271 | 1282.5354 | 1284.95   | 1296.8242 | 1321.8164 |
| 1327.2038 | 1330.5318 | 1370.9552 | 1376.3502 | 1384.2929 | 1389.3391 |
| 1399.2975 | 1406.3479 | 1425.0603 | 1454.6703 | 1466.8419 | 1469.7639 |
| 1486.6078 | 1488.6965 | 1493.6147 | 1498.0507 | 1501.2731 | 1505.3588 |
| 1527.5261 | 1541.1147 | 1561.6841 | 1585.6512 | 1610.7532 | 1650.8747 |
| 1652.6635 | 1702.3653 | 1704.9289 | 1739.5035 | 1741.6836 | 1761.8108 |
| 3066.4832 | 3074.859  | 3085.3211 | 3091.8922 | 3125.2148 | 3131.8461 |
| 3178.9963 | 3187.5627 | 3205.554  | 3207.4066 | 3216.4764 | 3216.9364 |
| 3227.858  | 3242.2442 | 3245.0298 | 3250.1944 | 3251.4181 | 3259.7651 |

|                                              |                             |
|----------------------------------------------|-----------------------------|
| E(RM062X)=                                   | -1754.77715                 |
| Zero-point correction=                       | 0.399732 (Hartree/Particle) |
| Thermal correction to Energy=                | 0.427833                    |
| Thermal correction to Enthalpy=              | 0.428777                    |
| Thermal correction to Gibbs Free Energy=     | 0.339264                    |
| Sum of electronic and zero-point Energies=   | -1754.377418                |
| Sum of electronic and thermal Energies=      | -1754.349317                |
| Sum of electronic and thermal Enthalpies=    | -1754.348373                |
| Sum of electronic and thermal Free Energies= | -1754.437886                |

2-OH

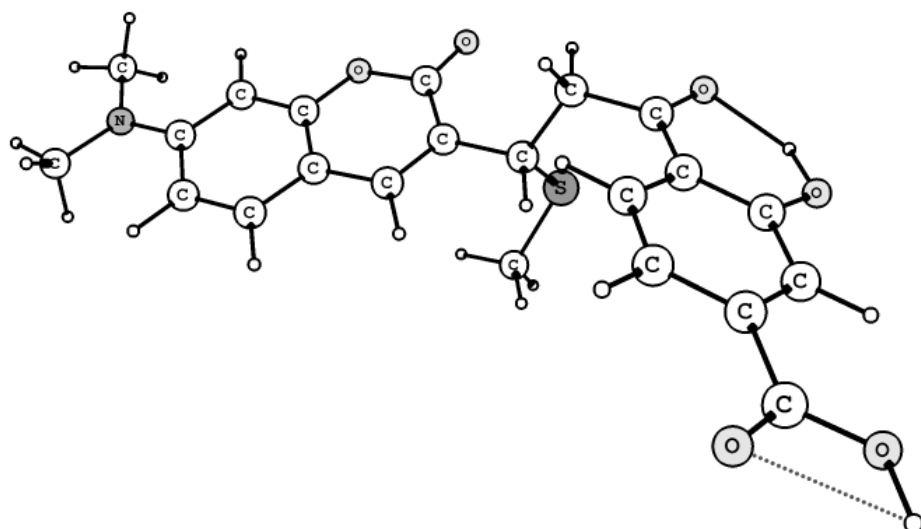

|    |              |              |              |
|----|--------------|--------------|--------------|
| 8  | 1.284383000  | 0.676442000  | 1.095152000  |
| 6  | 2.454963000  | 0.397926000  | 0.882062000  |
| 6  | 3.032676000  | -0.936962000 | 0.864276000  |
| 6  | 2.177986000  | -2.127030000 | 1.198570000  |
| 16 | 1.701939000  | -2.163037000 | 2.977646000  |
| 6  | 3.347752000  | -2.414206000 | 3.692525000  |
| 6  | 0.907014000  | -2.249116000 | 0.336117000  |
| 6  | 0.167654000  | -3.538707000 | 0.609943000  |
| 6  | 0.784260000  | -4.840292000 | 0.254318000  |
| 6  | 1.912899000  | -4.906309000 | -0.582743000 |
| 6  | 2.504509000  | -6.115445000 | -0.900524000 |
| 6  | 1.972210000  | -7.295766000 | -0.364875000 |
| 6  | 0.855329000  | -7.266971000 | 0.459500000  |
| 6  | 0.248348000  | -6.044285000 | 0.762877000  |
| 8  | -0.936929000 | -3.500665000 | 1.158391000  |
| 6  | 4.362168000  | -1.075091000 | 0.601853000  |
| 6  | 5.203822000  | 0.046730000  | 0.344835000  |
| 6  | 6.584233000  | -0.029139000 | 0.071150000  |
| 6  | 7.336976000  | 1.102985000  | -0.141794000 |
| 6  | 6.738845000  | 2.399469000  | -0.085462000 |
| 7  | 7.484595000  | 3.520355000  | -0.276240000 |
| 6  | 6.859381000  | 4.829115000  | -0.180433000 |
| 6  | 8.909489000  | 3.417552000  | -0.553703000 |
| 6  | 5.352445000  | 2.487273000  | 0.177512000  |
| 6  | 4.631231000  | 1.324817000  | 0.382509000  |
| 8  | 3.288048000  | 1.461262000  | 0.637318000  |
| 1  | 2.800235000  | -3.014761000 | 1.041848000  |
| 1  | 3.218370000  | -2.517017000 | 4.772622000  |
| 1  | 3.998156000  | -1.557980000 | 3.494924000  |
| 1  | 3.803644000  | -3.327337000 | 3.300034000  |
| 1  | 1.197912000  | -2.195702000 | -0.718976000 |
| 1  | 0.217711000  | -1.428858000 | 0.542884000  |
| 1  | 0.429260000  | -8.175554000 | 0.871314000  |
| 1  | 4.806416000  | -2.069964000 | 0.592716000  |
| 1  | 7.055578000  | -1.008020000 | 0.031507000  |
| 1  | 8.395670000  | 1.001587000  | -0.347058000 |
| 1  | 6.399914000  | 4.978219000  | 0.803984000  |
| 1  | 6.087181000  | 4.960933000  | -0.948087000 |



|   |              |               |              |
|---|--------------|---------------|--------------|
| 1 | 7.619495000  | 5.595862000   | -0.323026000 |
| 1 | 9.098518000  | 2.854763000   | -1.475089000 |
| 1 | 9.444597000  | 2.929400000   | 0.269321000  |
| 1 | 9.315323000  | 4.420731000   | -0.678010000 |
| 1 | 4.833835000  | 3.437051000   | 0.227324000  |
| 6 | 2.629821000  | -8.587854000  | -0.718577000 |
| 8 | 3.591443000  | -8.673996000  | -1.459432000 |
| 8 | 2.062236000  | -9.651593000  | -0.142339000 |
| 1 | 2.539273000  | -10.457700000 | -0.420835000 |
| 1 | 3.370924000  | -6.153712000  | -1.551384000 |
| 1 | 2.323646000  | -3.994465000  | -1.004680000 |
| 8 | -0.846527000 | -6.087538000  | 1.555930000  |
| 1 | -1.209214000 | -5.175795000  | 1.628370000  |

#### Frequencies

|           |           |           |           |           |           |
|-----------|-----------|-----------|-----------|-----------|-----------|
| 15.9907   | 25.181    | 32.2191   | 51.7146   | 52.8933   | 66.1466   |
| 69.109    | 89.945    | 97.1863   | 105.632   | 117.456   | 121.433   |
| 128.3825  | 138.6896  | 141.179   | 173.4877  | 179.0595  | 193.7937  |
| 201.0128  | 207.3494  | 222.1817  | 254.5453  | 265.6034  | 277.2596  |
| 281.6133  | 302.0695  | 313.5445  | 327.0344  | 355.8472  | 396.8665  |
| 402.7952  | 421.3114  | 440.5367  | 448.8853  | 458.6026  | 472.1407  |
| 475.5391  | 481.1419  | 497.1568  | 536.8886  | 540.73    | 551.8112  |
| 554.418   | 584.8052  | 611.6365  | 620.4162  | 625.7192  | 653.1305  |
| 661.7253  | 672.0366  | 688.3524  | 701.3737  | 726.6633  | 735.9052  |
| 744.2524  | 751.8056  | 758.4308  | 778.6426  | 790.4744  | 798.8171  |
| 818.1673  | 826.0026  | 841.0575  | 868.862   | 890.7533  | 931.4087  |
| 951.135   | 957.9427  | 965.016   | 977.3704  | 990.3333  | 1000.9396 |
| 1006.8674 | 1011.6181 | 1016.9169 | 1048.6506 | 1082.7856 | 1098.4029 |
| 1110.4308 | 1125.1709 | 1158.7715 | 1163.0186 | 1167.5514 | 1169.1483 |
| 1177.7689 | 1191.376  | 1194.1651 | 1233.5129 | 1234.7029 | 1244.7368 |
| 1266.3242 | 1282.0988 | 1286.3255 | 1299.8126 | 1319.9719 | 1322.2445 |
| 1333.247  | 1364.6486 | 1378.5663 | 1385.439  | 1395.2869 | 1403.0478 |
| 1405.5063 | 1423.3916 | 1452.8621 | 1466.1877 | 1467.9732 | 1469.0383 |
| 1489.1748 | 1496.1447 | 1497.5515 | 1500.0501 | 1506.4145 | 1510.4858 |
| 1526.6651 | 1537.8431 | 1556.7529 | 1581.1734 | 1611.1007 | 1645.2812 |
| 1656.06   | 1698.9193 | 1709.6143 | 1720.8053 | 1746.2734 | 1775.149  |
| 3070.6025 | 3077.0082 | 3088.4206 | 3115.7    | 3123.4061 | 3129.2064 |
| 3132.2394 | 3178.4465 | 3186.8652 | 3192.0583 | 3203.9187 | 3207.9787 |
| 3217.8138 | 3219.2679 | 3246.9691 | 3256.7146 | 3257.4238 | 3260.4302 |

|                                              |                            |
|----------------------------------------------|----------------------------|
| E(RM062X)=                                   | -1754.79679                |
| Zero-point correction=                       | 0.40084 (Hartree/Particle) |
| Thermal correction to Energy=                | 0.428653                   |
| Thermal correction to Enthalpy=              | 0.429597                   |
| Thermal correction to Gibbs Free Energy=     | 0.340832                   |
| Sum of electronic and zero-point Energies=   | -1754.39595                |
| Sum of electronic and thermal Energies=      | -1754.368137               |
| Sum of electronic and thermal Enthalpies=    | -1754.367193               |
| Sum of electronic and thermal Free Energies= | -1754.455958               |

## References

- S1 Jiang, X.; Yu, Y.; Chen, J.; Zhao, M.; Chen, H.; Song, X.; Matzuk, A. J.; Carroll, S. L.; Tan, X.; Sizovs, A.; Cheng, N.; Wang, M. C.; Wang, J., *ACS chemical biology* **2015**, *10*, 864.
- S2 Microbes, R.; Niedzwiecki, A.; Harakeh, S.; PCT Int. Appl., 2008114054, **2008**
- S3 Salerno, C. P.; Cleaves, H. J. *Synthetic communications* **2004**, *34*,2379.
- S4 Gharat, L. A.; Muthukaman, N.; Khairatkar-Joshi, N.; Kattige, V. G.; WO2013186692A1, **2013**.
- S5 M. J. Frisch, G. W. Trucks, H. B. Schlegel, G. E. Scuseria, M. A. Robb, J. R. Cheeseman, G. Scalmani, V. Barone, B. Mennucci, G. A. Petersson, H. Nakatsuji, M. Caricato, X. Li, H. P. Hratchian, A. F. Izmaylov, J. Bloino, G. Zheng, J. L. Sonnenberg, M. Hada, M. Ehara, K. Toyota, R. Fukuda, J. Hasegawa, M. Ishida, T. Nakajima, Y. Honda, O. Kitao, H. Nakai, T. Vreven, J. A. Montgomery, Jr., J. E. Peralta, F. Ogliaro, M. Bearpark, J. J. Heyd, E. Brothers, K. N. Kudin, V. N. Staroverov, T. Keith, R. Kobayashi, J. Normand, K. Raghavachari, A. Rendell, J. C. Burant, S. S. Iyengar, J. Tomasi, M. Cossi, N. Rega, J. M. Millam, M. Klene, J. E. Knox, J. B. Cross, V. Bakken, C. Adamo, J. Jaramillo, R. Gomperts, R. E. Stratmann, O. Yazyev, A. J. Austin, R. Cammi, C. Pomelli, J. W. Ochterski, R. L. Martin, K. Morokuma, V. G. Zakrzewski, G. A. Voth, P. Salvador, J. J. Dannenberg, S. Dapprich, A. D. Daniels, O. Farkas, J. B. Foresman, J. V. Ortiz, J. Cioslowski, and D. J. Fox, Gaussian, Inc., Wallingford CT, 2013.
